# Supplementary material for: Pd(ii)-Catalyzed asymmetric intramolecular arylation of unbiased methylene C(sp3)–H bonds using readily accessible 3,3′-F2-BINOL as a chiral ligand
Source: Royal Society of Chemistry journal article supplement (doi:10.1039/d1qo00302j), 2021-01-01
Supplement: d1qo00302j1.pdf [file d1qo00302j1.pdf]

## Supporting Information

# Pd(II)-Catalyzed Asymmetric Intramolecular Arylation of Unbiased Methylene C(sp<sup>3</sup>)-H Bonds Using Readily Accessible 3,3'-F<sub>2</sub>-BINOL as Chiral Ligand

Meng-Xue Jiang,<sup>a</sup> Xu Yang,<sup>a</sup> Ye-Qiang Han,<sup>b</sup> Tao Zhou,<sup>\*b</sup> Xue-Tao Xu,<sup>a</sup> Kun Zhang,<sup>a</sup> Bing-Feng Shi<sup>\*b,c</sup>

<sup>a</sup> School of Biotechnology and Health Sciences, Wuyi University, Jiangmen, 529020,

<sup>b</sup> Department of Chemistry, Zhejiang University, Hangzhou, Zhejiang, 310027 China

E-mail: [skybasket@126.com](mailto:skybasket@126.com); [bfshi@zju.edu.cn](mailto:bfshi@zju.edu.cn)

<sup>c</sup> College of Chemistry and Molecular Engineering, Zhengzhou University, Zhengzhou 450001,  
China

## Table of contents

|                                                                                  |    |
|----------------------------------------------------------------------------------|----|
| 1. General Information .....                                                     | 2  |
| 2. Experiment Detail and Characterization Date .....                             | 3  |
| 2.1 Preparation of Substrates. ....                                              | 3  |
| 2.2 General Procedure for the Enantioselective Intramolecular C-H Arylation..... | 15 |
| 3. Derivatizations .....                                                         | 29 |
| 4. X-Ray Crystallographic Data .....                                             | 32 |
| 5. References .....                                                              | 33 |
| 6. NMR Spectra .....                                                             | 34 |
| 7. HPLC Charts .....                                                             | 89 |

## 1. General Information

All the materials and solvent were purchased from commercial suppliers and used without additional purification. Pd(OAc)<sub>2</sub>, PdBr<sub>2</sub> was purchased from Laajoo (China), PdI<sub>2</sub> was purchased from Strem. (*S*)-BIONL and derivatives were purchased from Laajoo (China) and Daicel (China). NMR spectra were recorded on a Bruker Avance operating for <sup>1</sup>H NMR at 400 MHz, <sup>13</sup>C NMR at 100 MHz, <sup>19</sup>F NMR at 376 MHz using TMS as internal standard. The peaks were internally referenced to residual undeuterated chloroform in CDCl<sub>3</sub> (δ H = 7.26 ppm, δ C = 77.16 ppm). The following abbreviations (or combinations thereof) were used to explain multiplicities: s = singlet, d = doublet, t = triplet, q = quartet, m = multiplet. Mass spectroscopy data of the products were collected on an HRMS-TOF instrument. The ee value was determined on Shimadzu HPLC using CHIRALPAK column with hexane and 2-propanol as eluent, Wavelength = 254 nm.

## 2. Experiment Detail and Characterization Data

### 2.1 Preparation of Substrates.

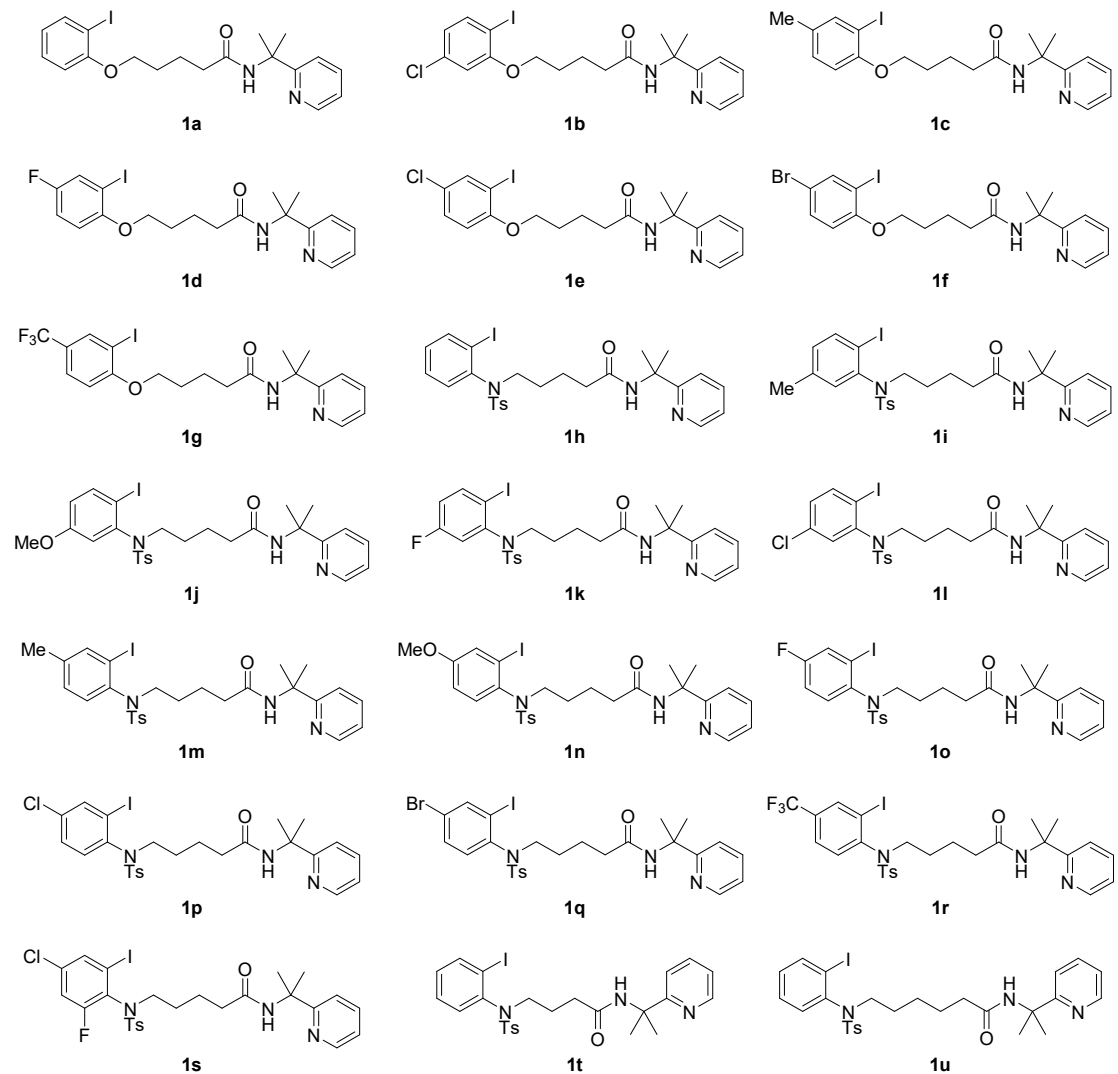

Aliphatic amides (**1a-1x**) were prepared according to the following procedure according to the literature<sup>1</sup> and the synthesis of **1a** was presented as a typical example (**GP**).

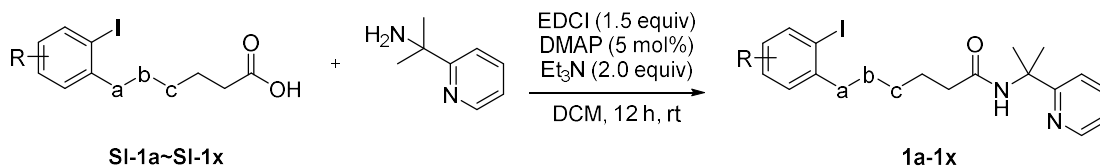

for example

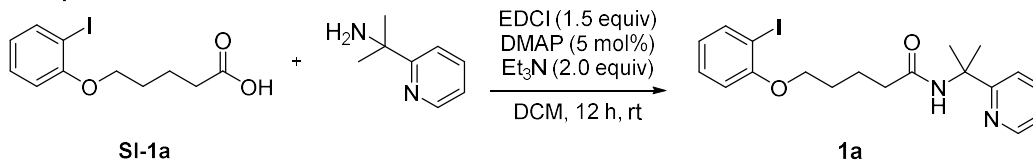

### General Procedure (GP):

A mixture of compound **SI-1a**, PIP-NH<sub>2</sub> (1.2 equiv), EDCI (1.5 equiv), DMAP (5 mol%), Et<sub>3</sub>N (2.0 equiv) in DCM (30 mL) was stirred at rt for 12 h. The reaction mixture was then diluted with H<sub>2</sub>O, and extracted with DCM (20 mL x 3). The organic layers were combined, washed with brine, dried over anhydrous Na<sub>2</sub>SO<sub>4</sub>. Compound **1a** was purified by flash chromatography and obtained as a white solid.

### 5-(2-iodophenoxy)-N-(2-(pyridin-2-yl)propan-2-yl)pentanamide 1a

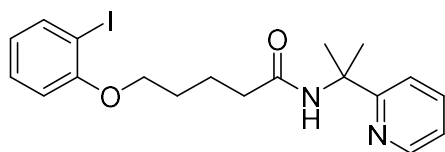

**1a** was prepared following **GP** and purified by flash chromatography in petroleum ether: ethyl acetate = 2:1 to give as white solid (2.4 g, 78% yield).

<sup>1</sup>H NMR (400 MHz, CDCl<sub>3</sub>) δ 8.50 (d, *J* = 4.8 Hz, 1H), 7.80 – 7.66 (m, 3H), 7.40 (d, *J* = 8.1 Hz, 1H), 7.28 (d, *J* = 8.2 Hz, 1H), 7.22 – 7.16 (m, 1H), 6.80 (dd, *J* = 8.3, 1.5 Hz, 1H), 6.69 (td, *J* = 7.5, 1.4 Hz, 1H), 4.07 – 4.00 (m, 2H), 2.43 – 2.35 (m, 2H), 1.96 – 1.88 (m, 4H), 1.75 (s, 6H).

<sup>13</sup>C NMR (101 MHz, CDCl<sub>3</sub>) δ 172.1, 164.7, 157.6, 147.7, 139.5, 137.2, 129.5, 122.5, 121.9, 119.6, 112.2, 86.8, 69.0, 56.5, 37.3, 28.6, 27.7, 22.6.

HRMS (ESI) *m/z*: [M + H]<sup>+</sup> Calcd for C<sub>19</sub>H<sub>23</sub>IN<sub>2</sub>O<sub>2</sub>H 439.0877; found: 439.0878.

### 5-(5-chloro-2-iodophenoxy)-N-(2-(pyridin-2-yl)propan-2-yl)pentanamide 1b

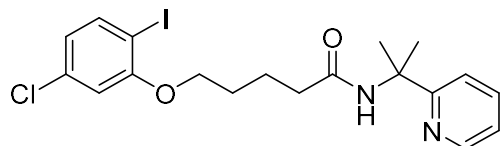

**1b** was prepared following **GP** and purified by flash chromatography in petroleum ether: ethyl acetate = 2:1 to give as white solid (0.72 g, 46% yield).

**<sup>1</sup>H NMR (400 MHz, CDCl<sub>3</sub>)** δ 8.52-8.47 (m, 1H), 7.76 (s, 1H), 7.71 (td, *J* = 7.7, 1.8 Hz, 1H), 7.64 (d, *J* = 8.3 Hz, 1H), 7.39 (dt, *J* = 8.1, 1.1 Hz, 1H), 7.21-7.15 (m, 1H), 6.76 (d, *J* = 2.2 Hz, 1H), 6.70 (dd, *J* = 8.3, 2.2 Hz, 1H), 4.05 – 3.99 (m, 2H), 2.41 – 2.35 (m, 2H), 1.94 – 1.88 (m, 4H), 1.75 (s, 6H).

**<sup>13</sup>C NMR (101 MHz, CDCl<sub>3</sub>)** δ 171.9, 164.7, 158.2, 147.7, 139.8, 137.2, 135.2, 122.5, 122.0, 119.6, 112.7, 84.0, 69.3, 56.5, 37.3, 28.5, 27.6, 22.5.

HRMS (ESI) *m/z*: [M + H]<sup>+</sup> Calcd for C<sub>19</sub>H<sub>22</sub>ClIN<sub>2</sub>O<sub>2</sub>H 473.0487; found: 473.0491.

**5-(2-iodo-4-methylphenoxy)-N-(2-(pyridin-2-yl)propan-2-yl)pentanamide 1c**

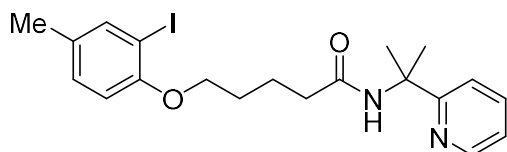

**1c** was prepared following **GP** and purified by flash chromatography in petroleum ether: ethyl acetate = 2:1 to give as white solid (1.90 g, 55% yield).

**<sup>1</sup>H NMR (400 MHz, CDCl<sub>3</sub>)** δ 8.54 – 8.46 (m, 1H), 7.79 – 7.66 (m, 2H), 7.58 (d, *J* = 2.1 Hz, 1H), 7.39 (dt, *J* = 8.1, 1.1 Hz, 1H), 7.21 – 7.14 (m, 1H), 7.05 (dd, *J* = 8.5, 2.2 Hz, 1H), 6.69 (d, *J* = 8.3 Hz, 1H), 4.05 – 3.96 (m, 2H), 2.42 – 2.32 (m, 2H), 2.24 (s, 3H), 1.94 – 1.84 (m, 4H), 1.75 (s, 6H).

**<sup>13</sup>C NMR (101 MHz, CDCl<sub>3</sub>)** δ 172.1, 164.7, 155.6, 147.8, 139.8, 137.2, 132.1, 130.0, 122.0, 119.6, 112.2, 86.7, 69.2, 56.5, 37.4, 28.7, 27.7, 22.7, 20.1.

HRMS (ESI) *m/z*: [M + H]<sup>+</sup> Calcd for C<sub>20</sub>H<sub>25</sub>IN<sub>2</sub>O<sub>2</sub>H 453.1033; found: 453.1036.

**5-(4-fluoro-2-iodophenoxy)-N-(2-(pyridin-2-yl)propan-2-yl)pentanamide 1d**

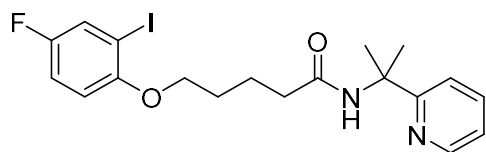

**1d** was prepared following **GP** and purified by flash chromatography in petroleum ether: ethyl acetate = 2:1 to give as white solid (0.82 g, 31% yield).

**<sup>1</sup>H NMR (400 MHz, CDCl<sub>3</sub>)** δ 8.52 – 8.46 (m, 1H), 7.76 (s, 1H), 7.71 (td, *J* = 7.8, 1.8 Hz, 1H), 7.47 (dd, *J* = 7.6, 3.0 Hz, 1H), 7.40 (dt, *J* = 8.2, 1.1 Hz, 1H), 7.22 – 7.15 (m, 1H), 7.03 – 6.94 (m, 1H), 6.72 (dd, *J* = 9.0, 4.6 Hz, 1H), 4.02 – 3.96 (m, 2H), 2.38 (t, *J* = 6.8 Hz, 2H), 1.95-1.84 (m, 4H), 1.75 (s, 6H).

**<sup>13</sup>C NMR (101 MHz, CDCl<sub>3</sub>)** δ 172.0, 164.7, 156.8 (d, <sup>1</sup>*J*<sub>C-F</sub> = 244.4 Hz), 154.3, 147.7, 137.2, 126.1 (d, <sup>2</sup>*J*<sub>C-F</sub> = 25.2 Hz), 122.0, 119.6, 115.7 (d, <sup>2</sup>*J*<sub>C-F</sub> = 22.2 Hz), 112.4 (d, <sup>3</sup>*J*<sub>C-F</sub> = 9.0 Hz), 86.2 (d, <sup>3</sup>*J*<sub>C-F</sub> = 8.0 Hz), 69.8, 56.5, 37.3, 29.4, 28.7, 27.7, 22.6.

**<sup>19</sup>F NMR (376 MHz, CDCl<sub>3</sub>)** δ -122.42.

HRMS (ESI) *m/z*: [M + H]<sup>+</sup> Calcd for C<sub>19</sub>H<sub>22</sub>FIN<sub>2</sub>O<sub>2</sub>H 457.0783; found: 457.0784.

**5-(4-chloro-2-iodophenoxy)-*N*-(2-(pyridin-2-yl)propan-2-yl)pentanamide 1e**

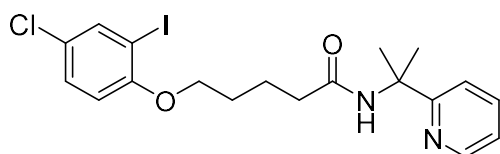

**1e** was prepared following **GP** and purified by flash chromatography in petroleum ether: ethyl acetate = 2:1 to give as white solid (0.42 g, 16% yield).

**<sup>1</sup>H NMR (400 MHz, CDCl<sub>3</sub>)** δ 8.52 – 8.48 (m, 1H), 7.76 (s, 1H), 7.73 – 7.68 (m, 3H), 7.39 (d, *J* = 8.1 Hz, 1H), 7.25 – 7.15 (m, 2H), 6.69 (d, *J* = 8.8 Hz, 1H), 4.00 – 3.97 (m, 2H), 2.43 – 2.32 (m, 2H), 1.94 – 1.86 (m, 4H), 1.75 (s, 6H).

**<sup>13</sup>C NMR (101 MHz, CDCl<sub>3</sub>)** δ 172.0, 164.7, 156.6, 147.7, 138.6, 137.2, 129.3, 126.3, 122.0, 119.6, 112.6, 86.9, 69.5, 56.5, 37.3, 28.6, 27.7, 22.6.

HRMS (ESI) *m/z*: [M + H]<sup>+</sup> Calcd for C<sub>19</sub>H<sub>22</sub>ClIN<sub>2</sub>O<sub>2</sub>H 473.0487; found: 473.0489.

**5-(4-bromo-2-iodophenoxy)-*N*-(2-(pyridin-2-yl)propan-2-yl)pentanamide 1f**

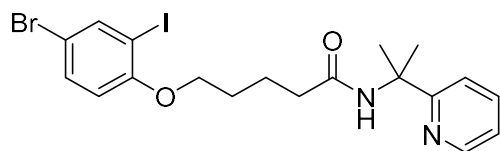

**1f** was prepared following **GP** and purified by flash chromatography in petroleum ether: ethyl acetate = 2:1 to give as white solid (2.76 g, 92% yield).

**<sup>1</sup>H NMR (400 MHz, CDCl<sub>3</sub>)** δ 8.53-8.45 (m, 1H), 7.84 (d, *J* = 2.4 Hz, 1H), 7.75 (s, 1H), 7.70 (td, *J* = 7.8, 1.8 Hz, 1H), 7.42 – 7.33 (m, 2H), 7.21 – 7.15 (m, 1H), 6.65 (d, *J* = 8.7 Hz, 1H), 4.02 – 3.97 (m, 2H), 2.42 – 2.33 (m, 2H), 1.93 – 1.86 (m, 4H), 1.75 (s, 6H).

$^{13}\text{C}$  NMR (101 MHz,  $\text{CDCl}_3$ )  $\delta$  172.0, 164.7, 157.0, 147.7, 141.2, 137.2, 132.2, 122.0, 119.6, 113.4, 113.2, 87.5, 69.4, 56.5, 37.3, 28.5, 27.6, 22.5.

HRMS (ESI)  $m/z$ :  $[\text{M} + \text{H}]^+$  Calcd for  $\text{C}_{19}\text{H}_{22}\text{BrIN}_2\text{O}_2\text{H}$  516.9982; found: 516.9985.

**5-(2-iodo-4-(trifluoromethyl)phenoxy)-N-(2-(pyridin-2-yl)propan-2-yl)pentanamide 1g**

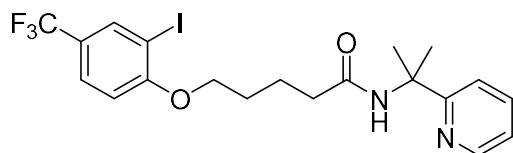

**1g** was prepared following **GP** and purified by flash chromatography in petroleum ether: ethyl acetate = 2:1 to give as white solid (0.65 g, 49% yield).

$^1\text{H}$  NMR (400 MHz,  $\text{CDCl}_3$ )  $\delta$  8.52-8.48 (m, 1H), 7.99 (dd,  $J = 2.2, 0.8$  Hz, 1H), 7.78 (s, 1H), 7.73 – 7.69 (m, 2H), 7.56 – 7.50 (m, 1H), 7.40 (dt,  $J = 8.1, 1.1$  Hz, 1H), 7.22 – 7.17 (m, 1H), 6.82 (d,  $J = 8.6$  Hz, 1H), 4.12 – 4.06 (m, 2H), 2.42-2.35 (m, 2H), 1.96 – 1.89 (m, 4H), 1.75 (s, 6H).

$^{13}\text{C}$  NMR (101 MHz,  $\text{CDCl}_3$ )  $\delta$  171.9, 164.7, 160.1, 147.7, 137.3, 136.6 (q,  $^3J_{\text{C-F}} = 4.0$  Hz), 127.0 (q,  $^3J_{\text{C-F}} = 4.0$  Hz), 126.1 (q,  $^1J_{\text{C-F}} = 271.69$  Hz), 124.4 (q,  $^2J_{\text{C-F}} = 32.3$  Hz), 122.0, 119.6, 111.2, 86.3, 69.4, 56.5, 37.2, 28.4, 27.6, 22.5.

$^{19}\text{F}$  NMR (376 MHz,  $\text{CDCl}_3$ )  $\delta$  -61.62.

HRMS (ESI)  $m/z$ :  $[\text{M} + \text{H}]^+$  Calcd for  $\text{C}_{20}\text{H}_{22}\text{F}_3\text{IN}_2\text{O}_2\text{H}$  507.0751; found: 507.0749.

**5-((N-(2-iodophenyl)-4-methylphenyl)sulfonamido)-N-(2-(pyridin-2-yl)propan-2-yl)pentanamide 1h**

**1h**

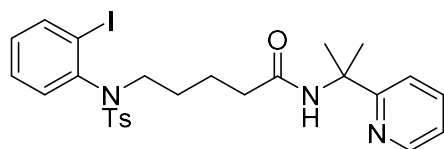

**1h** was prepared following **GP** and purified by flash chromatography in petroleum ether: ethyl acetate = 2:1 to give as white solid (2.88 g, 61% yield).

$^1\text{H}$  NMR (400 MHz,  $\text{CDCl}_3$ )  $\delta$  8.47 (d,  $J = 4.8$  Hz, 1H), 7.87 (dd,  $J = 8.0, 1.6$  Hz, 1H), 7.72 – 7.64 (m, 2H), 7.60 (d,  $J = 8.0$  Hz, 2H), 7.35 (d,  $J = 8.1$  Hz, 1H), 7.25 – 7.13 (m, 4H), 6.98 (t,  $J = 7.7$  Hz, 1H), 6.87 (dd,  $J = 8.0, 1.6$  Hz, 1H), 3.71 – 3.60 (m, 1H), 3.37 – 3.29 (m, 1H), 2.41 (s, 3H), 2.26 – 2.13 (m, 2H), 1.74 – 1.64 (m, 7H), 1.63 – 1.40 (m, 3H).

<sup>13</sup>C NMR (101 MHz, CDCl<sub>3</sub>) δ 171.7, 164.6, 147.7, 143.8, 141.7, 140.6, 137.2, 136.0, 130.2, 129.9, 129.6, 128.9, 128.3, 121.9, 119.5, 103.5, 56.5, 51.7, 37.2, 27.8, 27.6, 23.1, 21.7.

HRMS (ESI) m/z: [M + H]<sup>+</sup> Calcd for C<sub>26</sub>H<sub>30</sub>IN<sub>3</sub>O<sub>3</sub>SH 592.1125; found: 592.1128.

**5-((N-(2-iodo-5-methylphenyl)-4-methylphenyl)sulfonamido)-N-(2-(pyridin-2-yl)propan-2-yl)pentanamide 1i**

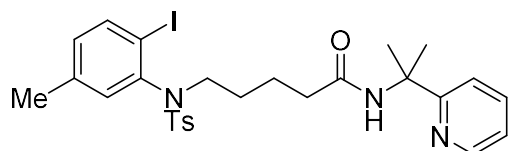

**1i** was prepared following **GP** and purified by flash chromatography in petroleum ether: ethyl acetate = 2:1 to give as light yellow oil (1.89 g, 82% yield).

<sup>1</sup>H NMR (400 MHz, CDCl<sub>3</sub>) δ 8.52 – 8.47 (m, 1H), 7.76 – 7.67 (m, 3H), 7.66 – 7.62 (m, 2H), 7.37 (dt, *J* = 8.1, 1.1 Hz, 1H), 7.27 (d, *J* = 6.8 Hz, 2H), 7.22-7.16 (m, 1H), 6.82 (dd, *J* = 8.2, 2.1 Hz, 1H), 6.74 (d, *J* = 2.1 Hz, 1H), 3.67 – 3.58 (m, 1H), 3.40 – 3.31 (m, 1H), 2.43 (s, 3H), 2.24 – 2.17 (m, 5H), 1.74 – 1.65 (m, 7H), 1.62 – 1.42 (m, 3H).

<sup>13</sup>C NMR (101 MHz, CDCl<sub>3</sub>) δ 171.8, 164.6, 147.7, 143.8, 141.4, 140.1, 139.2, 137.2, 136.2, 131.3, 131.0, 129.5, 128.4, 122.0, 119.6, 98.9, 56.5, 51.7, 37.3, 27.9, 27.6, 23.2, 21.7, 20.9.

HRMS (ESI) m/z: [M + H]<sup>+</sup> Calcd for C<sub>27</sub>H<sub>32</sub>IN<sub>3</sub>O<sub>3</sub>SH 606.1282; found: 606.1286.

**5-((N-(2-iodo-5-methoxyphenyl)-4-methylphenyl)sulfonamido)-N-(2-(pyridin-2-yl)propan-2-yl)pentanamide 1j**

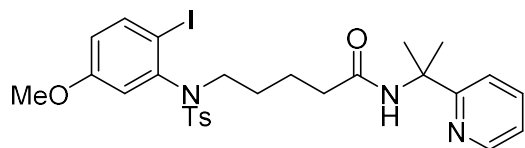

**1j** was prepared following **GP** and purified by flash chromatography in petroleum ether: ethyl acetate = 2:1 to give as light yellow oil (1.02 g, 62% yield).

<sup>1</sup>H NMR (400 MHz, CDCl<sub>3</sub>) δ 8.52-8.48 (m, 1H), 7.73 – 7.63 (m, 5H), 7.37 (dt, *J* = 8.1, 1.1 Hz, 1H), 7.30 – 7.26 (m, 2H), 7.21 – 7.15 (m, 1H), 6.62 (dd, *J* = 8.8, 2.9 Hz, 1H), 6.47 (d, *J* = 2.9 Hz, 1H), 3.70 – 3.60 (m, 4H), 3.39 – 3.30 (m, 1H), 2.42 (s, 3H), 2.24 – 2.18 (m, 2H), 1.76 – 1.68 (m, 7H), 1.62 – 1.41 (m, 3H).



$^{13}\text{C}$  NMR (101 MHz,  $\text{CDCl}_3$ )  $\delta$  171.8, 164.6, 160.3, 147.7, 143.8, 142.5, 140.5, 137.2, 136.1, 129.6, 128.4, 122.0, 119.6, 116.3, 91.6, 56.5, 55.6, 51.8, 37.3, 27.9, 27.6, 23.2, 21.7.

HRMS (ESI)  $m/z$ :  $[\text{M} + \text{H}]^+$  Calcd for  $\text{C}_{27}\text{H}_{32}\text{IN}_3\text{O}_4\text{SH}$  622.1231; found: 622.1232.

**5-((N-(5-fluoro-2-iodophenyl)-4-methylphenyl)sulfonamido)-N-(2-(pyridin-2-yl)propan-2-yl)pentanamide 1k**

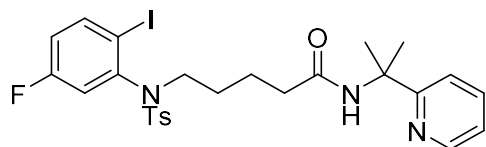

**1k** was prepared following **GP** and purified by flash chromatography in petroleum ether: ethyl acetate = 2:1 to give as white solid (1.39 g, 85% yield).

$^1\text{H}$  NMR (400 MHz,  $\text{CDCl}_3$ )  $\delta$  8.52 – 8.47 (m, 1H), 7.83 (dd,  $J$  = 8.8, 6.1 Hz, 1H), 7.70 (td,  $J$  = 7.8, 1.8 Hz, 2H), 7.65 – 7.61 (m, 2H), 7.37 (dt,  $J$  = 8.1, 1.1 Hz, 1H), 7.29 (d,  $J$  = 8.0 Hz, 2H), 7.22 – 7.15 (m, 1H), 6.85 – 6.76 (m, 1H), 6.67 (dd,  $J$  = 9.2, 2.9 Hz, 1H), 3.71 – 3.60 (m, 1H), 3.39–3.28 (m, 1H), 2.44 (s, 3H), 2.22 (td,  $J$  = 7.2, 2.2 Hz, 2H), 1.76 – 1.67 (m, 7H), 1.62 – 1.39 (m, 3H).

$^{13}\text{C}$  NMR (101 MHz, Chloroform-*d*)  $\delta$  171.6, 164.6, 162.7 (d,  $^1J_{\text{C-F}}$  = 251.49 Hz), 147.7, 144.2, 143.2 (d,  $^3J_{\text{C-F}}$  = 9.1 Hz), 141.0 (d,  $^3J_{\text{C-F}}$  = 8.1 Hz), 135.6, 129.8, 128.3, 122.0, 119.6, 117.8 (d,  $^2J_{\text{C-F}}$  = 23.2 Hz), 117.7 (d,  $^2J_{\text{C-F}}$  = 22.2 Hz), 96.8 (d,  $^4J_{\text{C-F}}$  = 4.0 Hz), 56.5, 51.8, 37.2, 27.8, 27.6, 23.1, 21.7.

$^{19}\text{F}$  NMR (376 MHz,  $\text{CDCl}_3$ )  $\delta$  -112.00.

HRMS (ESI)  $m/z$ :  $[\text{M} + \text{H}]^+$  Calcd for  $\text{C}_{26}\text{H}_{29}\text{FIN}_3\text{O}_3\text{SH}$  610.1031; found: 610.1033.

**5-((N-(5-chloro-2-iodophenyl)-4-methylphenyl)sulfonamido)-N-(2-(pyridin-2-yl)propan-2-yl)pentanamide 1l**

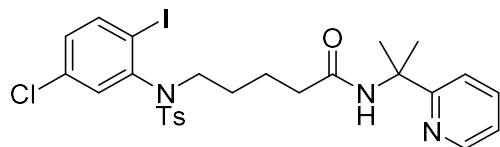

**1l** was prepared following **GP** and purified by flash chromatography in petroleum ether: ethyl acetate = 2:1 to give as light yellow oil (1.05 g, 53% yield).

$^1\text{H}$  NMR (400 MHz,  $\text{CDCl}_3$ )  $\delta$  8.51 – 8.46 (m, 1H), 7.80 (d,  $J$  = 8.5 Hz, 1H), 7.74 – 7.67 (m, 2H), 7.65 – 7.60 (m, 2H), 7.37 (dt,  $J$  = 8.0, 1.1 Hz, 1H), 7.30 (d,  $J$  = 8.1 Hz, 2H), 7.21 – 7.16 (m, 1H), 7.01 (dd,  $J$  = 8.5, 2.4 Hz, 1H), 6.86 (d,  $J$  = 2.4 Hz, 1H), 3.68–3.60 (m, 1H), 3.37 – 3.26 (m, 1H), 2.44 (s, 3H), 2.22 (td,  $J$  = 7.2, 1.7 Hz, 2H), 1.74 – 1.66 (m, 7H), 1.62 – 1.39 (m, 3H).

$^{13}\text{C}$  NMR (101 MHz,  $\text{CDCl}_3$ )  $\delta$  171.7, 164.6, 147.7, 144.2, 143.1, 141.1, 137.2, 135.6, 134.7, 130.4, 130.2, 129.8, 128.3, 122.0, 119.6, 100.9, 56.5, 51.8, 37.2, 27.8, 27.6, 23.1, 21.7.

HRMS (ESI)  $m/z$ :  $[\text{M} + \text{H}]^+$  Calcd for  $\text{C}_{26}\text{H}_{29}\text{ClIN}_3\text{O}_3\text{SH}$  626.0736; found: 626.0739.

**5-((N-(2-iodo-4-methylphenyl)-4-methylphenyl)sulfonamido)-N-(2-(pyridin-2-yl)propan-2-yl)pentanamide 1m**

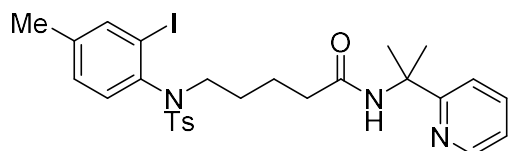

**1m** was prepared following **GP** and purified by flash chromatography in petroleum ether: ethyl acetate = 2:1 to give as light yellow oil (1.58 g, 64% yield).

$^1\text{H}$  NMR (400 MHz,  $\text{CDCl}_3$ )  $\delta$  8.49 (dt,  $J = 4.9, 1.4$  Hz, 1H), 7.73 – 7.67 (m, 3H), 7.65 – 7.60 (m, 2H), 7.37 (dd,  $J = 8.0, 1.2$  Hz, 1H), 7.29 – 7.24 (m, 3H), 7.21 – 7.15 (m, 1H), 7.02 (dd,  $J = 8.1, 2.0$  Hz, 1H), 6.74 (d,  $J = 8.1$  Hz, 1H), 3.70-3.60 (m, 1H), 3.37 – 3.27 (m, 1H), 2.42 (s, 3H), 2.27 (s, 3H), 2.24 – 2.17 (m, 2H), 1.69 (s, 3H), 1.68 (s, 1H), 1.67 – 1.35 (m, 4H).

$^{13}\text{C}$  NMR (101 MHz,  $\text{CDCl}_3$ )  $\delta$  171.8, 147.7, 143.7, 141.0, 140.3, 139.0, 137.2, 136.2, 129.7, 129.6, 128.3, 122.0, 119.6, 103.2, 56.5, 51.7, 37.3, 27.8, 27.6, 23.2, 21.7, 20.6.

HRMS (ESI)  $m/z$ :  $[\text{M} + \text{H}]^+$  Calcd for  $\text{C}_{27}\text{H}_{32}\text{IN}_3\text{O}_3\text{SH}$  606.1282; found: 606.1280.

**5-((N-(2-iodo-4-methoxyphenyl)-4-methylphenyl)sulfonamido)-N-(2-(pyridin-2-yl)propan-2-yl)pentanamide 1n**

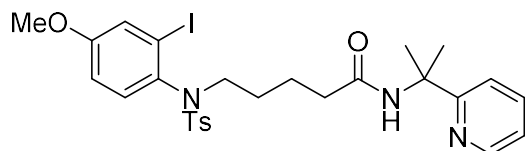

**1n** was prepared following **GP** and purified by flash chromatography in petroleum ether: ethyl acetate = 2:1 to give as yellow oil (1.20 g, 54% yield).

$^1\text{H}$  NMR (400 MHz,  $\text{CDCl}_3$ )  $\delta$  8.50 (d,  $J = 4.8$  Hz, 1H), 7.76 – 7.67 (m, 2H), 7.62 (d,  $J = 7.8$  Hz, 2H), 7.41 – 7.34 (m, 2H), 7.28 (s, 2H), 7.19 (dd,  $J = 7.4, 5.0$  Hz, 1H), 6.79 – 6.71 (m, 2H), 3.77 (s, 3H), 3.70 – 3.60 (m, 1H), 3.36-3.25 (m, 1H), 2.43 (s, 3H), 2.27 – 2.15 (m, 2H), 1.76 – 1.68 (dm, 7H), 1.66 – 1.39 (m, 3H).

$^{13}\text{C}$  NMR (101 MHz,  $\text{CDCl}_3$ )  $\delta$  171.8, 164.6, 159.4, 147.7, 143.7, 137.2, 136.1, 134.2, 130.1, 129.6, 128.2, 125.2, 121.9, 119.5, 114.8, 56.4, 55.7, 51.7, 37.2, 27.8, 27.6, 23.1, 21.7.

HRMS (ESI)  $m/z$ :  $[\text{M} + \text{H}]^+$  Calcd for  $\text{C}_{27}\text{H}_{32}\text{IN}_3\text{O}_4\text{SH}$  622.1231; found: 622.1233.

**5-((N-(4-fluoro-2-iodophenyl)-4-methylphenyl)sulfonamido)-N-(2-(pyridin-2-yl)propan-2-yl)pentanamide 1o**

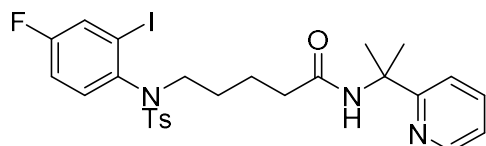

**1o** was prepared following **GP** and purified by flash chromatography in petroleum ether: ethyl acetate = 2:1 to give as white solid (0.25 g, 13% yield).

$^1\text{H}$  NMR (400 MHz,  $\text{CDCl}_3$ )  $\delta$  8.52-8.47 (m, 1H), 7.76 – 7.67 (m, 2H), 7.59 (td,  $J = 8.0, 2.3$  Hz, 3H), 7.38 (dt,  $J = 8.1, 1.1$  Hz, 1H), 7.28 (d,  $J = 8.1$  Hz, 2H), 7.22-7.17 (m, 1H), 6.99 – 6.92 (m, 1H), 6.84 (dd,  $J = 8.8, 5.4$  Hz, 1H), 3.70 – 3.3.60 (m, 1H), 3.38 – 3.28 (m, 1H), 2.43 (s, 3H), 2.25 – 2.18 (m, 2H), 1.76 – 1.67 (m, 7H), 1.61 – 1.38 (m, 3H).

$^{13}\text{C}$  NMR (101 MHz,  $\text{CDCl}_3$ )  $\delta$  171.7, 164.6, 161.4 (d,  $^1J_{\text{C-F}} = 255.5$  Hz), 147.7, 144.0, 138.1 (d,  $^4J_{\text{C-F}} = 3.0$  Hz), 137.3, 135.8, 130.8 (d,  $^3J_{\text{C-F}} = 9.0$  Hz), 129.7, 128.3, 127.4 (d,  $^2J_{\text{C-F}} = 24.2$  Hz), 122.0, 119.6, 115.9 (d,  $^2J_{\text{C-F}} = 22.2$  Hz), 103.5 (d,  $^3J_{\text{C-F}} = 9.1$  Hz), 56.5, 51.8, 37.2, 27.8, 27.6, 23.1, 21.7.

$^{19}\text{F}$  NMR (376 MHz,  $\text{CDCl}_3$ )  $\delta$  -111.17.

HRMS (ESI)  $m/z$ :  $[\text{M} + \text{H}]^+$  Calcd for  $\text{C}_{26}\text{H}_{29}\text{FIN}_3\text{O}_3\text{SH}$  610.1031; found: 610.1033.

**5-((N-(4-chloro-2-iodophenyl)-4-methylphenyl)sulfonamido)-N-(2-(pyridin-2-yl)propan-2-yl)pentanamide 1p**

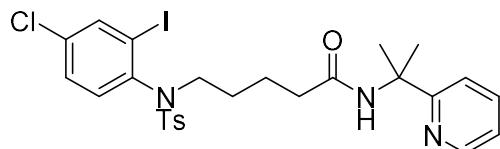

**1p** was prepared following **GP** and purified by flash chromatography in petroleum ether: ethyl acetate = 2:1 to give as yellow oil (1.40 g, 64% yield).

$^1\text{H}$  NMR (400 MHz,  $\text{CDCl}_3$ )  $\delta$  8.49 (d,  $J = 4.9$  Hz, 1H), 7.86 (d,  $J = 2.4$  Hz, 1H), 7.76 – 7.67 (m, 2H), 7.60 (d,  $J = 7.9$  Hz, 2H), 7.37 (d,  $J = 8.1$  Hz, 1H), 7.28 (d,  $J = 7.9$  Hz, 2H), 7.20 (td,  $J = 8.3, 3.7$  Hz, 2H),

6.79 (d,  $J = 8.5$  Hz, 1H), 3.70 – 3.59 (m, 1H), 3.37 – 3.27 (m, 1H), 2.43 (s, 3H), 2.25 – 2.17 (m, 2H), 1.69 (s, 3H), 1.68 (s, 1H), 1.66 – 1.35 (m, 4H).

$^{13}\text{C}$  NMR (101 MHz,  $\text{CDCl}_3$ )  $\delta$  171.6, 164.5, 147.7, 144.0, 140.5, 139.9, 137.2, 135.7, 134.9, 130.6, 129.7, 129.1, 128.2, 122.0, 119.6, 103.8, 56.5, 51.7, 37.1, 27.8, 27.6, 27.5, 23.1, 21.7.

HRMS (ESI)  $m/z$ :  $[\text{M} + \text{H}]^+$  Calcd for  $\text{C}_{26}\text{H}_{29}\text{ClIN}_3\text{O}_3\text{SH}$  626.0736; found: 626.0736.

**5-((N-(4-bromo-2-iodophenyl)-4-methylphenyl)sulfonamido)-N-(2-(pyridin-2-yl)propan-2-yl)pentanamide 1q**

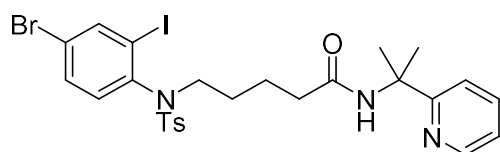

**1q** was prepared following **GP** and purified by flash chromatography in petroleum ether: ethyl acetate = 2:1 to give as yellow oil (2.48 g, 70% yield).

$^1\text{H}$  NMR (400 MHz,  $\text{CDCl}_3$ )  $\delta$  8.51 – 8.46 (m, 1H), 8.01 (d,  $J = 2.2$  Hz, 1H), 7.76 – 7.67 (m, 2H), 7.63 – 7.58 (m, 2H), 7.36 (td,  $J = 8.3, 1.7$  Hz, 2H), 7.28 (d,  $J = 8.1$  Hz, 2H), 7.22–7.16 (m, 1H), 6.73 (d,  $J = 8.4$  Hz, 1H), 3.69 – 3.59 (m, 1H), 3.36–3.26 (m, 1H), 2.43 (s, 3H), 2.24 – 2.17 (m, 2H), 1.69 (s, 3H), 1.68 (s, 1H), 1.66 – 1.38 (m, 4H).

$^{13}\text{C}$  NMR (101 MHz,  $\text{CDCl}_3$ )  $\delta$  171.6, 164.5, 147.7, 144.0, 142.6, 141.0, 137.2, 135.7, 132.1, 131.0, 129.7, 128.2, 122.9, 122.0, 119.6, 104.3, 56.4, 51.6, 37.1, 27.8, 27.6, 27.5, 23.0, 21.7.

HRMS (ESI)  $m/z$ :  $[\text{M} + \text{H}]^+$  Calcd for  $\text{C}_{26}\text{H}_{29}\text{BrIN}_3\text{O}_3\text{SH}$  670.0230; found: 670.0228.

**5-((N-(2-iodo-4-(trifluoromethyl)phenyl)-4-methylphenyl)sulfonamido)-N-(2-(pyridin-2-yl)propan-2-yl)pentanamide 1r**

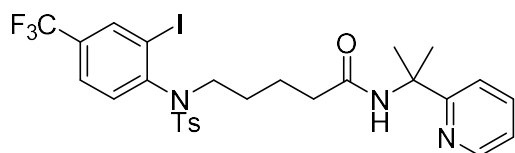

**1r** was prepared following **GP** and purified by flash chromatography in petroleum ether: ethyl acetate = 2:1 to give as light yellow oil (1.78 g, 72% yield).

$^1\text{H}$  NMR (400 MHz,  $\text{CDCl}_3$ )  $\delta$  8.48 (dt,  $J = 4.8, 1.4$  Hz, 1H), 8.12 (d,  $J = 2.1$  Hz, 1H), 7.75 (s, 1H), 7.71 (td,  $J = 4.0$  Hz, 2H), 7.64 – 7.59 (m, 2H), 7.49 (dd,  $J = 8.3, 2.1$  Hz, 1H), 7.37 (dt,  $J = 8.1, 1.1$  Hz, 1H),

7.30 (d,  $J = 8.1$  Hz, 2H), 7.23 – 7.15 (m, 1H), 7.00 (d,  $J = 8.2$  Hz, 1H), 3.73 – 3.63 (m, 1H), 3.42 – 3.30 (m, 1H), 2.44 (s, 3H), 2.25 – 2.18 (m, 2H), 1.67 (d,  $J = 8.3$  Hz, 7H), 1.64 – 1.39 (m, 3H).

$^{13}\text{C}$  NMR (101 MHz,  $\text{CDCl}_3$ )  $\delta$  171.5, 164.5, 147.6, 145.3, 144.2, 137.5 (q,  $^3J_{\text{C-F}} = 4.0$  Hz), 137.2, 135.6, 131.6 (q,  $^2J_{\text{C-F}} = 32.3$  Hz), 130.4, 129.8, 128.2, 125.9 (q,  $^3J_{\text{C-F}} = 4.0$  Hz), 122.6 (q,  $^1J_{\text{C-F}} = 274.7$  Hz), 122.0, 119.5, 103.4, 56.4, 51.7, 37.0, 27.8, 27.5, 23.0, 21.7.

$^{19}\text{F}$  NMR (376 MHz,  $\text{CDCl}_3$ )  $\delta$  -62.73.

HRMS (ESI)  $m/z$ :  $[\text{M} + \text{H}]^+$  Calcd for  $\text{C}_{27}\text{H}_{29}\text{F}_3\text{IN}_3\text{O}_3\text{SH}$  660.0999; found: 660.0998.

**5-((*N*-(4-chloro-2-fluoro-6-iodophenyl)-4-methylphenyl)sulfonamido)-*N*-(2-(pyridin-2-yl)propan-2-yl)pentanamide 1s**

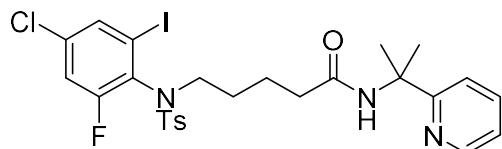

**1s** was prepared following **GP** and purified by flash chromatography in petroleum ether: ethyl acetate = 2:1 to give as light yellow oil (0.65 g, 55% yield).

$^1\text{H}$  NMR (400 MHz,  $\text{CDCl}_3$ )  $\delta$  8.49 (dt,  $J = 4.8, 1.4$  Hz, 1H), 7.77 – 7.65 (m, 5H), 7.37 (d,  $J = 8.1$  Hz, 1H), 7.28 (d,  $J = 8.1$  Hz, 2H), 7.21 – 7.15 (m, 1H), 7.05 (dd,  $J = 9.5, 2.3$  Hz, 1H), 3.68 – 3.58 (m, 1H), 3.43 – 3.32 (m, 1H), 2.42 (s, 3H), 2.22 (t,  $J = 7.1$  Hz, 2H), 1.69 (s, 6H), 1.66 – 1.44 (m, 4H).

$^{13}\text{C}$  NMR (101 MHz,  $\text{CDCl}_3$ )  $\delta$  171.6, 164.5, 159.4 (d,  $^1J_{\text{C-F}} = 259.6$  Hz), 147.6, 144.0, 137.2, 136.9, 135.9 (d,  $^3J_{\text{C-F}} = 11.1$  Hz), 135.6 (d,  $^4J_{\text{C-F}} = 3.0$  Hz), 129.7, 129.3 (d,  $^3J_{\text{C-F}} = 14.1$  Hz), 128.0, 122.0, 119.6, 117.7 (d,  $^2J_{\text{C-F}} = 25.2$  Hz), 104.9, 56.5, 50.4, 37.2, 28.2, 27.5, 23.1, 21.7.

$^{19}\text{F}$  NMR (376 MHz,  $\text{CDCl}_3$ )  $\delta$  -108.10.

HRMS (ESI)  $m/z$ :  $[\text{M} + \text{H}]^+$  Calcd for  $\text{C}_{26}\text{H}_{28}\text{ClFIN}_3\text{O}_3\text{SH}$  666.0461; found: 666.0465.

**4-((*N*-(2-iodophenyl)-4-methylphenyl)sulfonamido)-*N*-(2-(pyridin-2-yl)propan-2-yl)butanamide 1t**

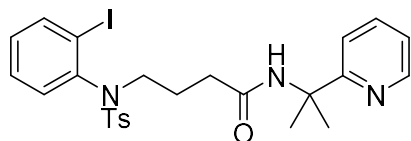

**1t** was prepared following **GP** and purified by flash chromatography in petroleum ether: ethyl acetate = 2:1 to give as white solid (1.67 g, 81% yield).

**<sup>1</sup>H NMR (400 MHz, CDCl<sub>3</sub>)** δ 8.54 – 8.48 (m, 1H), 7.91 (dd, *J* = 7.9, 1.5 Hz, 1H), 7.69 (td, *J* = 7.7, 1.8 Hz, 1H), 7.66 – 7.58 (m, 3H), 7.40 (dt, *J* = 8.1, 1.1 Hz, 1H), 7.28 (t, *J* = 2.5 Hz, 2H), 7.24 (d, *J* = 1.5 Hz, 1H), 7.22 – 7.14(m, 1H), 7.01 (td, *J* = 7.7, 1.6 Hz, 1H), 6.87 (dd, *J* = 7.9, 1.6 Hz, 1H), 3.83 – 3.72 (m, 1H), 3.46 – 3.35 (m, 1H), 2.48 – 2.32 (m, 5H), 1.84 – 1.76 (m, 2H), 1.73 (s, 3H), 1.71 (s, 3H).

**<sup>13</sup>C NMR (101 MHz, CDCl<sub>3</sub>)** δ 171.4, 164.7, 147.9, 143.9, 142.0, 140.7, 137.1, 130.1, 130.0, 129.7, 129.1, 128.4, 121.9, 119.6, 103.6, 56.7, 51.6 34.8, 27.8, 27.6, 24.4, 21.7.

HRMS (ESI) *m/z*: [M + H]<sup>+</sup> Calcd for C<sub>25</sub>H<sub>28</sub>IN<sub>3</sub>O<sub>3</sub>SH 578.0969; found: 578.0969.

**6-((*N*-(2-iodophenyl)-4-methylphenyl)sulfonamido)-*N*-(2-(pyridin-2-yl)propan-2-yl)hexanamide**

**1u**

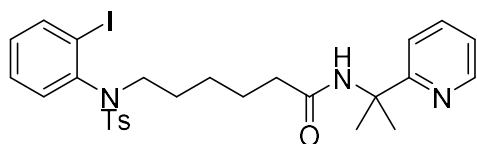

**1u** was prepared following **GP** and purified by flash chromatography in petroleum ether: ethyl acetate = 2:1 to give as white solid (1.72 g, 84% yield).

**<sup>1</sup>H NMR (400 MHz, CDCl<sub>3</sub>)** δ 8.52-8.46 (m, 1H), 7.90 (dd, *J* = 7.9, 1.5 Hz, 1H), 7.70 (td, *J* = 7.8, 1.8 Hz, 1H), 7.65 (s, 1H), 7.61 (dt, *J* = 8.6, 2.1 Hz, 1H), 7.38 (dt, *J* = 8.1, 1.1 Hz, 1H), 7.28 (d, *J* = 1.6 Hz, 2H), 7.24 (d, *J* = 1.5 Hz, 1H), 7.20 – 7.15 (m, 1H), 7.01 (td, *J* = 7.6, 1.6 Hz, 1H), 6.90 (dd, *J* = 7.9, 1.6 Hz, 1H), 3.68-3.57 (m, 1H), 3.41 – 3.30 (m, 1H), 2.43 (s, 3H), 2.19 (t, *J* = 7.5 Hz, 2H), 1.72 (d, *J* = 1.2 Hz, 6H), 1.63 – 1.53 (m, 2H), 1.48 – 1.22 (m, 4H).

**<sup>13</sup>C NMR (101 MHz, CDCl<sub>3</sub>)** δ 172.1, 164.7, 147.7, 143.7, 141.8, 140.6, 137.2, 136.2, 130.3, 129.9, 129.6, 128.9, 128.3, 122.0, 119.6, 103.5, 56.5, 51.9, 37.6, 28.1, 27.6, 26.6, 25.3, 21.7.

HRMS (ESI) *m/z*: [M + H]<sup>+</sup> Calcd for C<sub>27</sub>H<sub>32</sub>IN<sub>3</sub>O<sub>3</sub>SH 606.1282; found: 606.1280.

## 2.2 General Procedure for the Enantioselective Intramolecular C-H Arylation

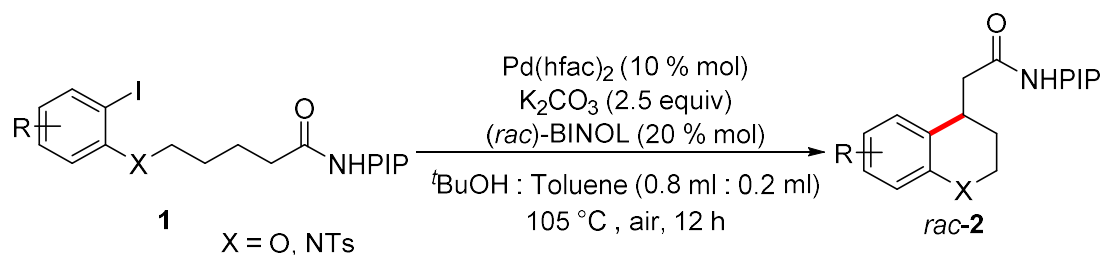

**General Procedure for the Synthesis of Racemic Product *rac-2*:** To a 50 mL Schlenk tube was added aliphatic amide **1** (0.10 mmol, 1.0 equiv), *rac*-BINOL (5.7 mg, 20 mol%),  $K_2CO_3$  (34.5 mg, 2.5 equiv),  $Pd(hfac)_2$  (5.2 mg, 10 mol%) and toluene: *t*-BuOH (0.2 mL: 0.8 mL). The mixture was stirred at 105 °C (aluminum heat transfer block) for 12 h under air. After cooling to room temperature, the mixture was diluted with ethyl acetate, filtrated through celite. After concentration, the resulting residue was purified by preparative TLC using Hexane/EtOAc as the eluent to afford the desired racemic product *rac-2*.

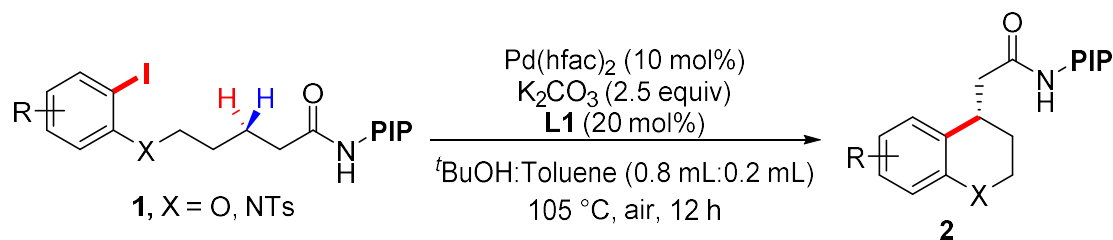

**General Procedure for the Synthesis of Chiral Product **2**:** To a 50 mL Schlenk tube was added aliphatic amide **1** (0.10 mmol, 1.0 equiv), **L1** (6.4 mg, 20 mol%),  $K_2CO_3$  (34.5 mg, 2.5 equiv),  $Pd(hfac)_2$  (5.2 mg, 10 mol%) and toluene: *t*-BuOH (0.2 mL: 0.8 mL). The mixture was stirred at 105 °C (aluminum heat transfer block) for 12 h under air. After cooling to room temperature, the mixture was diluted with ethyl acetate, filtrated through celite. After concentration, the resulting residue was purified by preparative TLC using Hexane/EtOAc as the eluent to afford the desired product **2**.

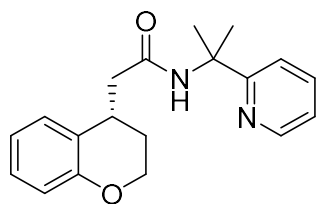

**(S)-2-(chroman-4-yl)-N-(2-(pyridin-2-yl)propan-2-yl)acetamide 2a:**

A purification by flash chromatography in petroleum ether: ethyl acetate = 1:1 to give **2a** as a white solid (26.7 mg, 86%). The ee value was determined by HPLC analysis on a Chiralcel OD-H column (hexane/isopropanol = 85/15, flow = 0.8 mL/min) with  $t_r$  = 9.7 min (minor), 10.9 min (major): 97% ee.

**<sup>1</sup>H NMR (400 MHz, CDCl<sub>3</sub>)**  $\delta$  8.51 – 8.45 (m, 1H), 7.81 (s, 1H), 7.72 (td,  $J$  = 7.8, 1.8 Hz, 1H), 7.40 (d,  $J$  = 8.1 Hz, 1H), 7.23 – 7.16 (m, 2H), 7.13-7.04 (m, 1H), 6.84 (td,  $J$  = 7.5, 1.3 Hz, 1H), 6.80 (dd,  $J$  = 8.2, 1.3 Hz, 1H), 4.26 – 4.14 (m, 2H), 3.51-3.40 (m, 1H), 2.77 (dd,  $J$  = 14.4, 5.4 Hz, 1H), 2.42 (dd,  $J$  = 14.5, 9.5 Hz, 1H), 2.22 – 2.11 (m, 1H), 1.89 – 1.83 (m, 1H), 1.77 (s, 6H).

**<sup>13</sup>C NMR (101 MHz, CDCl<sub>3</sub>)**  $\delta$  170.5, 164.4, 154.7, 147.7, 137.3, 129.0, 127.7, 125.4, 122.1, 120.4, 119.6, 117.0, 63.7, 56.8, 44.7, 30.8, 27.6, 27.5, 27.5.

HRMS (ESI)  $m/z$ :  $[M + H]^+$  Calcd for C<sub>19</sub>H<sub>22</sub>N<sub>2</sub>O<sub>2</sub>H 311.1754; found: 311.1755.

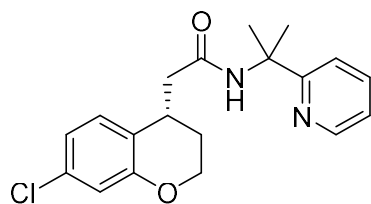

**(S)-2-(7-chlorochroman-4-yl)-N-(2-(pyridin-2-yl)propan-2-yl)acetamide 2b:**

A purification by flash chromatography in petroleum ether: ethyl acetate = 1:1 to give **2b** as a white solid (26.5 mg, 77%). The ee value was determined by HPLC analysis on a Chiralcel OD-H column (hexane/isopropanol = 80/20, flow = 1.0 mL/min) with  $t_r$  = 5.7 min (minor), 6.8 min (major): 90% ee.

**<sup>1</sup>H NMR (400 MHz, CDCl<sub>3</sub>)**  $\delta$  8.51 – 8.45 (m, 1H), 7.85 (s, 1H), 7.74 (td,  $J$  = 7.8, 1.8 Hz, 1H), 7.43 – 7.38 (m, 1H), 7.24 – 7.18 (m, 1H), 7.13 – 7.06 (m, 1H), 6.84 – 6.75 (m, 2H), 4.23 – 4.14 (m, 2H), 3.47 – 3.37 (m, 1H), 2.70 (dd,  $J$  = 14.5, 5.7 Hz, 1H), 2.41 (dd,  $J$  = 14.5, 9.0 Hz, 1H), 2.18 – 2.08 (m, 1H), 1.89 – 1.80 (m, 1H), 1.77 (s, 6H).

**<sup>13</sup>C NMR (101 MHz, CDCl<sub>3</sub>)**  $\delta$  170.2, 164.3, 155.4, 147.6, 137.5, 132.7, 130.0, 124.0, 122.2, 120.6, 119.7, 117.1, 63.9, 56.7, 44.5, 30.4, 27.6, 27.5, 27.3.

HRMS (ESI)  $m/z$ :  $[M + H]^+$  Calcd for C<sub>19</sub>H<sub>21</sub>ClN<sub>2</sub>O<sub>2</sub>H 345.1364; found: 345.1364.



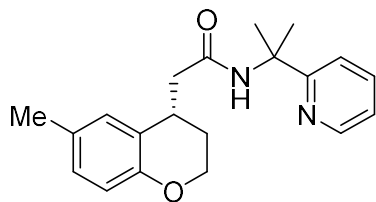

**(S)-2-(6-methylchroman-4-yl)-N-(2-(pyridin-2-yl)propan-2-yl)acetamide 2c:**

A purification by flash chromatography in petroleum ether: ethyl acetate = 1:1 to give **2c** as a white solid (26.6 mg, 82%). The ee value was determined by HPLC analysis on a Chiralcel AS-H column (hexane/isopropanol = 80/20, flow = 1.0 mL/min) with  $t_r$  = 5.7 min (minor), 9.3 min (major): 95% ee.

**<sup>1</sup>H NMR (400 MHz, CDCl<sub>3</sub>)**  $\delta$  8.51 – 8.43 (m, 1H), 7.84 (s, 1H), 7.72 (td,  $J$  = 7.8, 1.8 Hz, 1H), 7.40 (dt,  $J$  = 8.1, 1.0 Hz, 1H), 7.22 – 7.16 (m, 1H), 6.99 (d,  $J$  = 2.2 Hz, 1H), 6.89 (dd,  $J$  = 8.2, 2.2 Hz, 1H), 6.70 (d,  $J$  = 8.3 Hz, 1H), 4.22 – 4.10 (m, 2H), 3.47 – 3.36 (m, 1H), 2.74 (dd,  $J$  = 14.4, 5.6 Hz, 1H), 2.42 (dd,  $J$  = 14.4, 9.1 Hz, 1H), 2.22 (s, 3H), 2.19 – 2.08 (m, 1H), 1.87 – 1.81 (m, 1H), 1.77 (s, 3H), 1.76 (s, 3H).

**<sup>13</sup>C NMR (101 MHz, CDCl<sub>3</sub>)**  $\delta$  170.6, 164.4, 152.4, 147.7, 137.3, 129.5, 129.3, 128.4, 125.0, 122.1, 119.6, 116.8, 63.6, 56.7, 44.9, 30.8, 27.7, 27.6, 27.5, 20.7.

HRMS (ESI)  $m/z$ :  $[M + H]^+$  Calcd for C<sub>20</sub>H<sub>24</sub>N<sub>2</sub>O<sub>2</sub>H 325.1911; found: 325.1909.

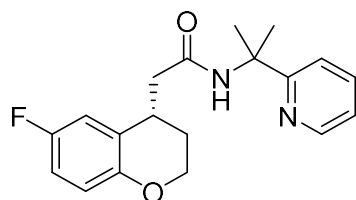

**(S)-2-(6-fluorochroman-4-yl)-N-(2-(pyridin-2-yl)propan-2-yl)acetamide 2d:**

A purification by flash chromatography in petroleum ether: ethyl acetate = 1:1 to give **2d** as a white solid (26.2 mg, 80%). The ee value was determined by HPLC analysis on a Chiralcel OD-H column (hexane/isopropanol = 85/15, flow = 1.0 mL/min) with  $t_r$  = 6.6 min (minor), 8.2 min (major): 96% ee.

**<sup>1</sup>H NMR (400 MHz, CDCl<sub>3</sub>)**  $\delta$  8.50 – 8.42 (m, 1H), 7.88 (s, 1H), 7.72 (td,  $J$  = 7.8, 1.8 Hz, 1H), 7.39 (dt,  $J$  = 8.1, 1.1 Hz, 1H), 7.22 – 7.15 (m, 1H), 6.89 (dd,  $J$  = 9.4, 3.0 Hz, 1H), 6.78 (td,  $J$  = 8.4, 8.0, 3.0 Hz, 1H), 6.72 (dd,  $J$  = 9.0, 5.0 Hz, 1H), 4.23 – 4.09 (m, 2H), 3.48 – 3.34 (m, 1H), 2.71 (dd,

$J = 14.5, 5.8$  Hz, 1H), 2.42 (dd,  $J = 14.5, 8.9$  Hz, 1H), 2.20 – 2.06 (m, 1H), 1.88 – 1.79 (m, 1H), 1.77 (s, 3H), 1.76 (s, 3H).

$^{13}\text{C}$  NMR (101 MHz,  $\text{CDCl}_3$ )  $\delta$  170.1, 164.3, 156.8 (d,  $^1J_{\text{C-F}} = 238.36$ ), 150.7, 147.7, 137.3, 126.4 (d,  $^3J_{\text{C-F}} = 7.1$  Hz), 122.1, 119.6, 117.9 (d,  $^3J_{\text{C-F}} = 8.1$  Hz), 114.8 (d,  $^2J_{\text{C-F}} = 23.2$  Hz), 114.5 (d,  $^2J_{\text{C-F}} = 23.2$  Hz), 63.8, 56.7, 44.6, 31.0, 27.6, 27.5, 27.4.

$^{19}\text{F}$  NMR (376 MHz,  $\text{CDCl}_3$ )  $\delta$  -123.94.

HRMS (ESI)  $m/z$ :  $[\text{M} + \text{H}]^+$  Calcd. for  $\text{C}_{19}\text{H}_{21}\text{FN}_2\text{O}_2\text{H}$  329.1660; found: 329.1661.

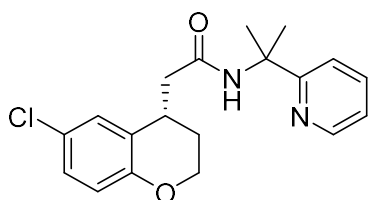

**(S)-2-(6-chlorochroman-4-yl)-N-(2-(pyridin-2-yl)propan-2-yl)acetamide 2e:**

A purification by flash chromatography in petroleum ether: ethyl acetate = 1:1 to give **2e** as a pale yellow solid (21.3 mg, 62%). The ee value was determined by HPLC analysis on a Chiralcel AS-H column (hexane/isopropanol = 70/30, flow = 1.0 mL/min) with  $t_r = 4.2$  min (minor), 5.0 min (major): 92% ee.

$^1\text{H}$  NMR (400 MHz,  $\text{CDCl}_3$ )  $\delta$  8.54 – 8.40 (m, 1H), 7.87 (s, 1H), 7.72 (td,  $J = 7.8, 1.8$  Hz, 1H), 7.40 (d,  $J = 8.1$  Hz, 1H), 7.23 – 7.14 (m, 2H), 7.02 (dd,  $J = 8.7, 2.6$  Hz, 1H), 6.72 (d,  $J = 8.7$  Hz, 1H), 4.26 – 4.08 (m, 2H), 3.48 – 3.35 (m, 1H), 2.70 (dd,  $J = 14.5, 6.0$  Hz, 1H), 2.43 (dd,  $J = 14.4, 8.7$  Hz, 1H), 2.20 – 2.06 (m, 1H), 1.88 – 1.81 (m, 2H), 1.78 (s, 3H), 1.77 (s, 3H).

$^{13}\text{C}$  NMR (101 MHz,  $\text{CDCl}_3$ )  $\delta$  170.1, 164.3, 153.3, 147.6, 137.4, 128.6, 127.7, 126.9, 125.1, 122.1, 119.6, 118.3, 63.8, 56.7, 44.5, 30.8, 27.6, 27.3.

HRMS (ESI)  $m/z$ :  $[\text{M} + \text{H}]^+$  Calcd. for  $\text{C}_{19}\text{H}_{21}\text{ClN}_2\text{O}_2\text{H}$  345.1364; found: 345.1365.

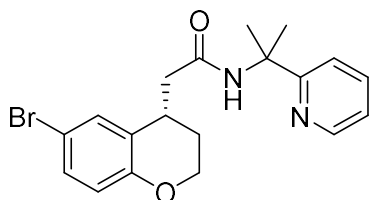

**(S)-2-(6-bromochroman-4-yl)-N-(2-(pyridin-2-yl)propan-2-yl)acetamide 2f:**

A purification by flash chromatography in petroleum ether: ethyl acetate = 2:1 to give **2f** as a pale yellow solid (32.2 mg, 83%). The ee value was determined by HPLC analysis on a Chiralcel IA column (hexane/isopropanol = 80/20, flow = 1.0 mL/min) with  $t_r$  = 13.6 min (minor), 15.9 min (major): 97% ee.

**<sup>1</sup>H NMR (400 MHz, CDCl<sub>3</sub>)**  $\delta$  8.51 – 8.43 (m, 1H), 7.90 (s, 1H), 7.72 (td,  $J$  = 7.8, 1.8 Hz, 1H), 7.39 (d,  $J$  = 8.1 Hz, 1H), 7.30 (d,  $J$  = 2.4 Hz, 1H), 7.22 – 7.12 (m, 2H), 6.67 (d,  $J$  = 8.7 Hz, 1H), 4.2 – 4.12 (m, 2H), 3.48 – 3.36 (m,  $J$  = 8.4, 5.8 Hz, 1H), 2.69 (dd,  $J$  = 14.4, 6.0 Hz, 1H), 2.42 (dd,  $J$  = 14.4, 8.7 Hz, 1H), 2.18 – 2.06 (m, 1H), 1.89 – 1.80 (m, 1H), 1.77 (s, 3H), 1.76 (s, 3H).

**<sup>13</sup>C NMR (101 MHz, CDCl<sub>3</sub>)**  $\delta$  167.0, 164.3, 153.8, 147.6, 137.3, 131.6, 130.6, 127.5, 122.1, 119.6, 118.9, 112.4, 63.8, 56.7, 44.5, 30.7, 27.6, 27.5, 27.2.

HRMS (ESI)  $m/z$ :  $[M + H]^+$  Calcd. for C<sub>19</sub>H<sub>21</sub>BrN<sub>2</sub>O<sub>2</sub>H 389.0859; found: 389.0858.

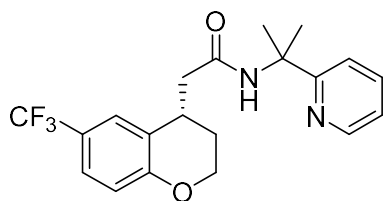

**(S)-N-(2-(pyridin-2-yl)propan-2-yl)-2-(6-(trifluoromethyl)chroman-4-yl)acetamide 2g:**

A purification by flash chromatography in petroleum ether: ethyl acetate = 1:1 to give **2g** as a white solid (32.6 mg, 86%). The ee value was determined by HPLC analysis on a Chiralcel AS-H column (hexane/isopropanol = 80/20, flow = 1.0 mL/min) with  $t_r$  = 4.3 min (minor), 5.3 min (major): 96% ee.

**<sup>1</sup>H NMR (400 MHz, CDCl<sub>3</sub>)**  $\delta$  8.50 – 8.42 (m, 1H), 7.92 (s, 1H), 7.72 (td,  $J$  = 7.8, 1.8 Hz, 1H), 7.46 (d,  $J$  = 2.3 Hz, 1H), 7.40 (dt,  $J$  = 8.0, 1.1 Hz, 1H), 7.32 (dd,  $J$  = 8.6, 2.3 Hz, 1H), 7.22 – 7.15 (m, 1H), 6.85 (d,  $J$  = 8.5 Hz, 1H), 4.31 – 4.16 (m, 2H), 3.56 – 3.43 (m, 1H), 2.74 (dd,  $J$  = 14.5, 6.1 Hz, 1H), 2.46 (dd,  $J$  = 14.5, 8.6 Hz, 1H), 2.23 – 2.10 (m, 1H), 1.93 – 1.85 (m, 2H), 1.77 (s, 3H), 1.76 (s, 3H).

**<sup>13</sup>C NMR (101 MHz, CDCl<sub>3</sub>)**  $\delta$  169.9, 164.3, 157.3, 147.6, 137.4, 126.4 (q,  $^3J_{C-F}$  = 3.8 Hz), 125.7, 124.6 (q,  $^1J_{C-F}$  = 271.7 Hz), 124.9 (q,  $^3J_{C-F}$  = 4.0 Hz), 122.5 (q,  $^2J_{C-F}$  = 32.3 Hz), 122.1, 119.6, 117.4, 64.1, 56.7, 44.4, 30.7, 27.5, 27.5, 27.2.

**<sup>19</sup>F NMR (376 MHz, CDCl<sub>3</sub>)**  $\delta$  -61.39.

HRMS (ESI) m/z: [M + H]<sup>+</sup> Calcd. for C<sub>20</sub>H<sub>21</sub>F<sub>3</sub>N<sub>2</sub>O<sub>2</sub>H 379.1628; found: 379.1629.

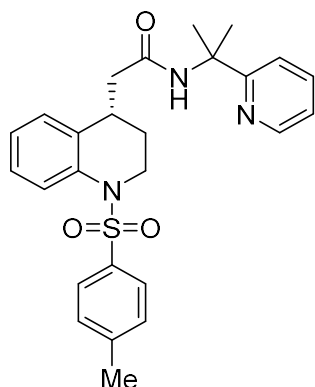

**(S)-N-(2-(pyridin-2-yl)propan-2-yl)-2-(1-tosyl-1,2,3,4-tetrahydroquinolin-4-yl)acetamide 2h:**

A purification by flash chromatography in petroleum ether: ethyl acetate = 1:1 to give **2h** as a pale-yellow oil (45.9 mg, 99%). The ee value was determined by HPLC analysis on a Chiralcel AS-H column (hexane/isopropanol = 70/30, flow = 0.8 mL/min) with *t<sub>r</sub>* = 13.5 min (minor), 16.5 min (major): 95% ee.

<sup>1</sup>H NMR (400 MHz, CDCl<sub>3</sub>) δ 8.55 – 8.46 (m, 1H), 7.81 (dd, *J* = 8.3, 1.2 Hz, 1H), 7.73 (td, *J* = 7.8, 1.8 Hz, 1H), 7.57 (s, 1H), 7.53 – 7.47 (m, 2H), 7.38 (dt, *J* = 8.1, 1.0 Hz, 1H), 7.24 – 7.11 (m, 5H), 7.08 (td, *J* = 7.4, 1.3 Hz, 1H), 3.81 (t, *J* = 6.0 Hz, 2H), 3.25 – 3.14 (m, 1H), 2.36 (s, 3H), 2.36 – 2.31 (m, 1H), 1.86 – 1.77 (m, 2H), 1.71 (s, 6H), 1.58 – 1.48 (m, 1H).

<sup>13</sup>C NMR (101 MHz, CDCl<sub>3</sub>) δ 170.1, 164.3, 147.6, 143.8, 137.4, 136.7, 136.7, 133.3, 129.7, 128.8, 127.4, 127.0, 125.2, 124.9, 122.2, 119.7, 56.7, 44.4, 44.3, 32.7, 27.5, 26.5, 21.6.

HRMS (ESI) m/z: [M + H]<sup>+</sup> Calcd. for C<sub>26</sub>H<sub>29</sub>N<sub>3</sub>O<sub>3</sub>SH 464.2002; found: 464.2003.

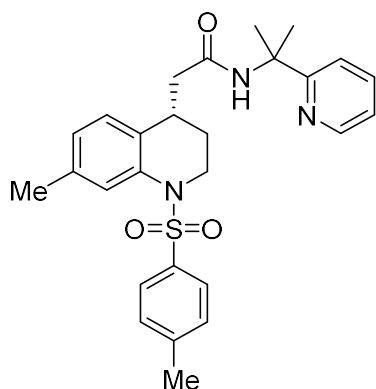

**(S)-2-(7-methyl-1-tosyl-1,2,3,4-tetrahydroquinolin-4-yl)-N-(2-(pyridin-2-yl)propan-2-yl)acetamide 2i:**

A purification by flash chromatography in petroleum ether: ethyl acetate = 2:1 to give **2i** as a white solid (45.3 mg, 95%). The ee value was determined by HPLC analysis on a Chiralcel AD-H column (hexane/isopropanol = 80/20, flow = 1.0 mL/min) with  $t_r$  = 12.7 min (minor), 14.1 min (major): 94% ee.

**<sup>1</sup>H NMR (400 MHz, CDCl<sub>3</sub>)**  $\delta$  8.50 (dd,  $J$  = 5.1, 1.6 Hz, 1H), 7.72 (td,  $J$  = 7.8, 1.8 Hz, 1H), 7.64 (s, 1H), 7.54 (s, 1H), 7.50 (d,  $J$  = 8.0 Hz, 1H), 7.37 (d,  $J$  = 8.1 Hz, 1H), 7.21 (dd,  $J$  = 7.8, 3.4 Hz, 3H), 7.02 (d,  $J$  = 7.9 Hz, 1H), 6.90 (dd,  $J$  = 7.9, 1.7 Hz, 1H), 3.85 – 3.70 (m, 2H), 3.21 – 3.09 (m, 1H), 2.39 – 2.27 (m, 7H), 1.82 – 1.73 (m, 2H), 1.71 (s, 6H), 1.53 – 1.43 (m, 1H).

**<sup>13</sup>C NMR (101 MHz, CDCl<sub>3</sub>)**  $\delta$  170.2, 164.3, 147.6, 143.7, 137.3, 136.8, 136.6, 136.5, 130.2, 129.7, 128.5, 127.4, 126.2, 125.4, 122.1, 119.6, 56.6, 44.5, 32.3, 27.5, 26.4, 21.6, 21.4.

HRMS (ESI)  $m/z$ :  $[M + H]^+$  Calcd. for C<sub>27</sub>H<sub>31</sub>N<sub>3</sub>O<sub>3</sub>SH 478.2159; found: 478.2160.

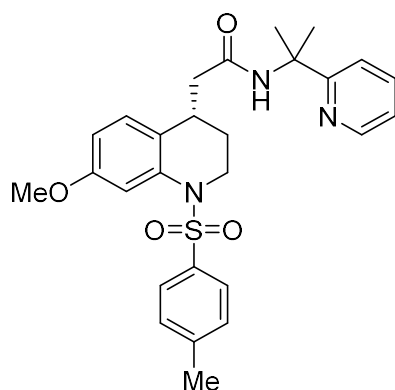

**(S)-2-(7-methoxy-1-tosyl-1,2,3,4-tetrahydroquinolin-4-yl)-N-(2-(pyridin-2-yl)propan-2-yl)acetamide 2j:**

A purification by flash chromatography in petroleum ether: ethyl acetate = 2:1 to give **2j** as a pale yellow oil (43.4 mg, 88%). The ee value was determined by HPLC analysis on a Chiralcel OD-H column (hexane/isopropanol = 85/15, flow = 0.8 mL/min) with  $t_r$  = 19.9 min (minor), 23.9 min (major): 92% ee.

**<sup>1</sup>H NMR (400 MHz, CDCl<sub>3</sub>)**  $\delta$  8.54 – 8.44 (m, 1H), 7.71 (td,  $J$  = 7.8, 1.7 Hz, 1H), 7.55 (s, 1H), 7.53 – 7.48 (m, 2H), 7.40 (d,  $J$  = 2.6 Hz, 1H), 7.36 (dt,  $J$  = 7.9, 1.0 Hz, 1H), 7.24 – 7.16 (m, 3H), 7.03 (d,  $J$  = 8.5 Hz, 1H), 6.65 (dd,  $J$  = 8.6, 2.6 Hz, 1H), 3.84 – 3.74 (m, 5H), 3.20 – 3.07 (m, 1H),

2.36 (s, 3H), 2.29 (dd,  $J = 14.4, 5.3$  Hz, 1H), 1.78 (dd,  $J = 14.4, 9.7$  Hz, 1H), 1.70 (s, 6H), 1.53 – 1.42 (m, 1H).

$^{13}\text{C}$  NMR (101 MHz,  $\text{CDCl}_3$ )  $\delta$  170.2, 164.3, 158.2, 147.6, 143.8, 137.4, 137.3, 136.7, 129.7, 129.4, 127.3, 125.1, 122.1, 119.6, 112.1, 109.3, 56.6, 55.5, 44.6, 44.5, 32.1, 27.5, 26.4, 21.6.

HRMS (ESI)  $m/z$ :  $[\text{M} + \text{H}]^+$  Calcd. for  $\text{C}_{27}\text{H}_{31}\text{N}_3\text{O}_4\text{SH}$  494.2108; found: 494.2110.

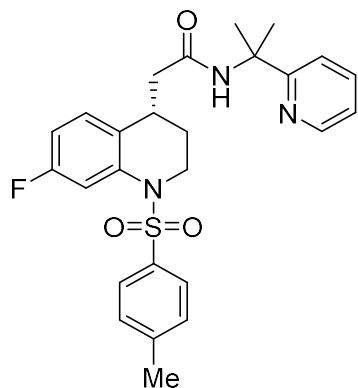

**(S)-2-(7-fluoro-1-tosyl-1,2,3,4-tetrahydroquinolin-4-yl)-N-(2-(pyridin-2-yl)propan-2-yl)acetamide 2k:**

A purification by flash chromatography in dichloromethane: ethyl acetate = 9:1 to give **2k** as a pale yellow oil (37.5 mg, 78%). The ee value was determined by HPLC analysis on a Chiralcel AD-H column (hexane/isopropanol = 80/20, flow = 1.0 mL/min) with  $t_r = 13.8$  min (minor), 16.4 min (major): 94% ee.

$^1\text{H}$  NMR (400 MHz,  $\text{CDCl}_3$ )  $\delta$  8.51 – 8.45 (m, 1H), 7.72 (td,  $J = 7.7, 1.6$  Hz, 1H), 7.65 – 7.57 (m, 2H), 7.54 (d,  $J = 8.0$  Hz, 2H), 7.36 (dt,  $J = 8.2, 1.0$  Hz, 1H), 7.25 – 7.18 (m, 3H), 7.08 (dd,  $J = 8.7, 6.4$  Hz, 1H), 6.76 (td,  $J = 8.2, 2.6$  Hz, 1H), 3.89 – 3.80 (m, 1H), 3.78 – 3.69 (m, 1H), 3.25 – 3.14 (m, 1H), 2.36 (s, 3H), 2.27 (dd,  $J = 14.5, 5.5$  Hz, 1H), 1.86 (dd,  $J = 14.5, 9.4$  Hz, 1H), 1.75 – 1.66 (m, 7H), 1.58 – 1.51 (m, 1H).

$^{13}\text{C}$  NMR (101 MHz,  $\text{CDCl}_3$ )  $\delta$  169.8, 164.2, 161.1 (d,  $^1J_{\text{C-F}} = 244.4$  Hz), 147.6, 144.1, 137.7 (d,  $^3J_{\text{C-F}} = 11.1$  Hz), 137.4, 136.2, 129.9 (d,  $^3J_{\text{C-F}} = 7.1$  Hz), 128.4 (d,  $^4J_{\text{C-F}} = 3.0$  Hz), 127.3, 122.2, 119.6, 112.0 (d,  $^2J_{\text{C-F}} = 22.2$  Hz), 111.2 (d,  $^2J_{\text{C-F}} = 26.2$  Hz), 56.7, 44.3, 44.1, 32.3, 27.5, 27.5, 26.3, 21.6.

$^{19}\text{F}$  NMR (376 MHz,  $\text{CDCl}_3$ )  $\delta$  -114.12.

HRMS (ESI)  $m/z$ :  $[\text{M} + \text{H}]^+$  Calcd. for  $\text{C}_{26}\text{H}_{28}\text{FN}_3\text{O}_3\text{SH}$  482.1908; found: 482.1911.

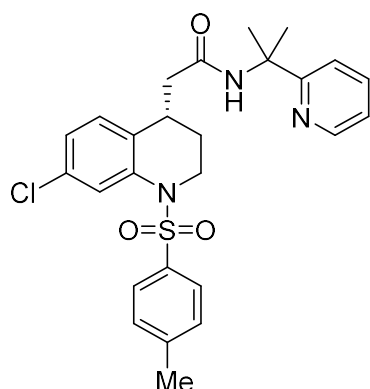

**(S)-2-(7-chloro-1-tosyl-1,2,3,4-tetrahydroquinolin-4-yl)-N-(2-(pyridin-2-yl)propan-2-yl)acetamide 2l:**

A purification by flash chromatography in dichloromethane: ethyl acetate = 9:1 to give **2l** as a pale yellow oil (44.7 mg, 90%). The ee value was determined by HPLC analysis on a Chiralcel AD-H column (hexane/isopropanol = 80/20, flow = 1.0 mL/min) with  $t_r$  = 9.1 min (minor), 10.0 min (major): 95% ee.

**$^1\text{H NMR}$  (400 MHz,  $\text{CDCl}_3$ )**  $\delta$  8.50 (dd,  $J$  = 4.9, 1.5 Hz, 1H), 7.88 (d,  $J$  = 1.9 Hz, 1H), 7.73 (td,  $J$  = 7.8, 1.8 Hz, 1H), 7.61 (s, 1H), 7.55 (d,  $J$  = 8.0 Hz, 2H), 7.37 (d,  $J$  = 8.1 Hz, 1H), 7.25-7.19 (m, 3H), 7.10 – 7.00 (m, 2H), 3.88 – 3.68 (m, 2H), 3.25 – 3.12 (m, 1H), 2.38 (s, 3H), 2.27 (dd,  $J$  = 14.5, 5.5 Hz, 1H), 1.86 (dd,  $J$  = 14.5, 9.3 Hz, 1H), 1.79 – 1.72 (m, 1H), 1.71 (s, 6H), 1.59 – 1.50 (m, 1H).

**$^{13}\text{C NMR}$  (101 MHz,  $\text{CDCl}_3$ )**  $\delta$  169.7, 164.2, 147.6, 144.2, 137.6, 137.4, 136.3, 132.3, 131.4, 129.9, 129.8, 127.3, 125.1, 124.3, 122.2, 119.6, 56.7, 44.2, 44.1, 32.4, 27.5, 27.5, 26.3, 21.7.

HRMS (ESI)  $m/z$ :  $[\text{M} + \text{H}]^+$  Calcd. for  $\text{C}_{26}\text{H}_{28}\text{ClN}_3\text{O}_3\text{SH}$  498.1613; found: 498.1614.

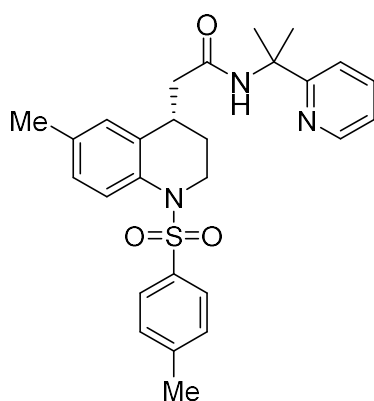

**(S)-2-(6-methyl-1-tosyl-1,2,3,4-tetrahydroquinolin-4-yl)-N-(2-(pyridin-2-yl)propan-2-yl)acetamide 2m:**

A purification by flash chromatography in petroleum ether: ethyl acetate = 1:1 to give **2m** as a pale yellow solid (45.8 mg, 96%). The ee value was determined by HPLC analysis on a Chiralcel AS-H column (hexane/isopropanol = 80/20, flow = 1.0 mL/min) with  $t_r$  = 21.0 min (minor), 28.1 min (major): 96% ee.

**$^1\text{H}$  NMR (400 MHz,  $\text{CDCl}_3$ )**  $\delta$  8.53 – 8.45 (m, 1H), 7.76 – 7.65 (m, 2H), 7.54 (s, 1H), 7.51 – 7.45 (m, 2H), 7.37 (dt,  $J$  = 8.1, 1.1 Hz, 1H), 7.23 – 7.16 (m, 3H), 7.02 – 6.89 (m, 2H), 3.82 – 3.70 (m, 2H), 3.20 – 3.08 (m, 1H), 2.36 (s, 3H), 2.29 (dd,  $J$  = 14.4, 5.4 Hz, 1H), 2.24 (s, 3H), 1.82 – 1.66 (m, 8H), 1.52 – 1.43 (m, 1H).

**$^{13}\text{C}$  NMR (101 MHz,  $\text{CDCl}_3$ )**  $\delta$  170.2, 164.3, 147.5, 143.7, 137.4, 136.7, 134.8, 134.0, 133.0, 129.7, 129.2, 127.7, 127.4, 124.8, 122.1, 119.6, 56.6, 44.5, 44.4, 32.6, 27.6, 27.5, 26.5, 21.6, 20.9.

HRMS (ESI)  $m/z$ :  $[\text{M} + \text{H}]^+$  Calcd. for  $\text{C}_{27}\text{H}_{31}\text{N}_3\text{O}_3\text{SH}$  478.2159; found: 478.2161.

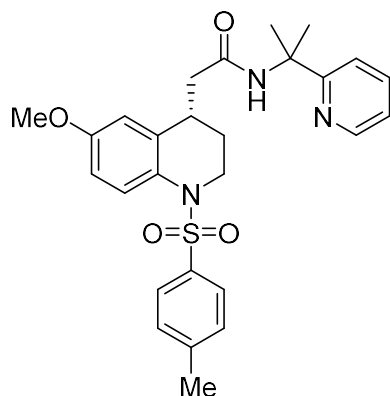

**(S)-2-(6-methoxy-1-tosyl-1,2,3,4-tetrahydroquinolin-4-yl)-N-(2-(pyridin-2-yl)propan-2-yl)acetamide 2n:**

A purification by flash chromatography in petroleum ether: ethyl acetate = 1:1 to give **2n** as a pale yellow oil (44.3 mg, 90%). The ee value was determined by HPLC analysis on a Chiralcel AD-H column (hexane/isopropanol = 80/20, flow = 1.0 mL/min) with  $t_r$  = 9.8 min (minor), 11.6 min (major): 94% ee.

**$^1\text{H}$  NMR (400 MHz,  $\text{CDCl}_3$ )**  $\delta$  8.53 – 8.46 (m, 1H), 7.76 – 7.67 (m, 2H), 7.55 (s, 1H), 7.48 – 7.41 (m, 2H), 7.37 (dt,  $J$  = 8.0, 1.1 Hz, 1H), 7.24 – 7.17 (m, 3H), 6.76 (dd,  $J$  = 9.0, 3.0 Hz, 1H), 6.66 (d,



$J = 2.9$  Hz, 1H), 3.84 – 3.65 (m, 5H), 3.17 – 3.07 (m, 1H), 2.36 (s, 3H), 2.31 (dd,  $J = 14.5, 5.0$  Hz, 1H), 1.75 – 1.63 (m, 8H), 1.47 – 1.36 (m, 1H).

$^{13}\text{C NMR}$  (101 MHz,  $\text{CDCl}_3$ )  $\delta$  170.1, 164.3, 157.2, 147.5, 143.7, 137.4, 136.6, 135.1, 129.7, 129.6, 127.4, 126.9, 122.2, 119.7, 113.2, 112.8, 56.7, 55.5, 44.6, 44.5, 32.7, 27.5, 26.1, 21.6.

HRMS (ESI)  $m/z$ :  $[\text{M} + \text{H}]^+$  Calcd. for  $\text{C}_{27}\text{H}_{31}\text{N}_3\text{O}_4\text{SH}$  494.2108; found: 494.2110.

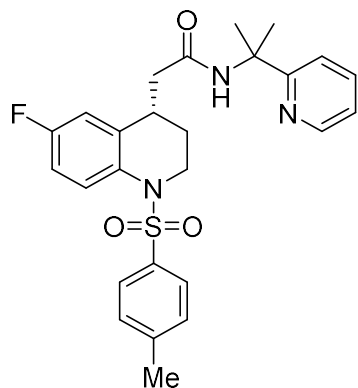

**(S)-2-(6-fluoro-1-tosyl-1,2,3,4-tetrahydroquinolin-4-yl)-N-(2-(pyridin-2-yl)propan-2-yl)acetamide 2o:**

A purification by flash chromatography in petroleum ether: ethyl acetate = 1:1 to give **2o** as a pale yellow oil (35.1 mg, 73%). The ee value was determined by HPLC analysis on a Chiralcel OD-H column (hexane/isopropanol = 80/20, flow = 0.8 mL/min) with  $t_r = 15.3$  min (minor), 17.8 min (major): 96% ee.

$^1\text{H NMR}$  (400 MHz,  $\text{CDCl}_3$ )  $\delta$  8.55 – 8.46 (m, 1H), 7.82 – 7.68 (m, 2H), 7.62 (s, 1H), 7.49 – 7.43 (m, 2H), 7.37 (dt,  $J = 8.0, 1.1$  Hz, 1H), 7.25 – 7.18 (m, 3H), 6.94 – 6.81 (m, 2H), 3.84 – 3.68 (m, 2H), 3.19 – 3.09 (m, 1H), 2.38 (s, 3H), 2.26 (dd,  $J = 14.5, 5.5$  Hz, 1H), 1.80 (dd,  $J = 14.5, 9.3$  Hz, 1H), 1.75 – 1.66 (m, 7H), 1.51 – 1.40 (m, 1H).

$^{13}\text{C NMR}$  (101 MHz,  $\text{CDCl}_3$ )  $\delta$  169.8, 164.2, 160.2 (d,  $^1J_{\text{C-F}} = 246.4$  Hz), 147.5, 144.0, 137.5, 136.5, 135.7 (d,  $^3J_{\text{C-F}} = 7.1$  Hz), 132.6 (d,  $^4J_{\text{C-F}} = 3.0$  Hz), 129.8, 127.4, 127.1 (d,  $^3J_{\text{C-F}} = 8.1$  Hz), 122.2, 119.7, 114.9 (d,  $^2J_{\text{C-F}} = 22.2$  Hz), 114.0 (d,  $^2J_{\text{C-F}} = 22.2$  Hz), 56.7, 44.5, 44.2, 32.7, 27.6, 27.5, 26.22, 21.6.

$^{19}\text{F NMR}$  (376 MHz,  $\text{CDCl}_3$ )  $\delta$  -116.85.

HRMS (ESI)  $m/z$ :  $[\text{M} + \text{H}]^+$  Calcd. for  $\text{C}_{26}\text{H}_{28}\text{FN}_3\text{O}_3\text{SH}$  482.1908; found: 482.1907.

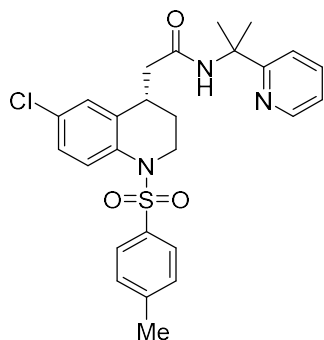

**(S)-2-(6-chloro-1-tosyl-1,2,3,4-tetrahydroquinolin-4-yl)-N-(2-(pyridin-2-yl)propan-2-yl)acetamide 2p:**

A purification by flash chromatography in petroleum ether: ethyl acetate = 1:1 to give **2p** as a pale yellow oil (49.2 mg, 99%). The ee value was determined by HPLC analysis on a Chiralcel AD-H column (hexane/isopropanol = 80/20, flow = 1.0 mL/min) with  $t_r$  = 12.0 min (minor), 13.2 min (major): 95% ee.

$^1\text{H NMR}$  (400 MHz,  $\text{CDCl}_3$ )  $\delta$  8.49 (dt,  $J$  = 5.0, 1.4 Hz, 1H), 7.81 – 7.68 (m, 2H), 7.61 (s, 1H), 7.48 (dd,  $J$  = 8.6, 1.9 Hz, 1H), 7.37 (dd,  $J$  = 8.1, 1.3 Hz, 1H), 7.25 – 7.18 (m, 3H), 7.16 – 7.10 (m, 2H), 3.85 – 3.68 (m, 2H), 3.22 – 3.09 (m, 1H), 2.37 (s, 3H), 2.25 (dd,  $J$  = 14.5, 5.6 Hz, 1H), 1.85 (dd,  $J$  = 14.5, 9.1 Hz, 1H), 1.75 – 1.65 (m, 7H), 1.54 – 1.44 (m, 1H).

$^{13}\text{C NMR}$  (101 MHz,  $\text{CDCl}_3$ )  $\delta$  169.6, 164.2, 147.5, 144.1, 137.4, 136.3, 135.2, 135.0, 130.5, 129.9, 128.5, 127.3, 127.1, 126.2, 122.2, 119.6, 56.7, 44.3, 44.0, 32.6, 27.5, 26.2, 21.6.

HRMS (ESI)  $m/z$ :  $[\text{M} + \text{H}]^+$  Calcd. for  $\text{C}_{26}\text{H}_{28}\text{ClN}_3\text{O}_3\text{SH}$  498.1613; found: 498.1615.

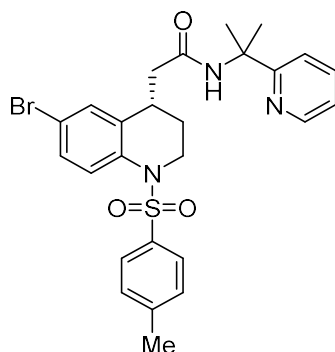

**(S)-2-(6-bromo-1-tosyl-1,2,3,4-tetrahydroquinolin-4-yl)-N-(2-(pyridin-2-yl)propan-2-yl)acetamide 2q:**

A purification by flash chromatography in petroleum ether: ethyl acetate = 1:1 to give **2q** as a pale yellow oil (51.9 mg, 96%). The ee value was determined by HPLC analysis on a Chiralcel IB N-5

column (hexane/isopropanol = 85/15, flow = 1.0 mL/min) with  $t_r$  = 15.7 min (minor), 17.3 min (major): 96% ee.

$^1\text{H NMR}$  (400 MHz,  $\text{CDCl}_3$ )  $\delta$  8.53 – 8.45 (m, 1H), 7.77 – 7.68 (m, 2H), 7.62 (s, 1H), 7.53 – 7.47 (m, 2H), 7.37 (dt,  $J$  = 8.2, 1.1 Hz, 1H), 7.31 – 7.27 (m, 2H), 7.25 – 7.19 (m, 3H), 3.85 – 3.68 (m, 2H), 3.21 – 3.10 (m, 1H), 2.37 (s, 3H), 2.25 (dd,  $J$  = 14.5, 5.7 Hz, 1H), 1.87 (dd,  $J$  = 14.5, 9.2 Hz, 1H), 1.77 – 1.66 (m, 7H), 1.57 – 1.45 (m, 1H).

$^{13}\text{C NMR}$  (101 MHz,  $\text{CDCl}_3$ )  $\delta$  169.6, 164.2, 147.5, 144.1, 137.4, 136.3, 135.8, 135.3, 131.5, 130.0, 129.9, 127.3, 126.4, 122.2, 119.6, 118.4, 56.7, 44.2, 44.0, 32.6, 27.6, 27.5, 26.3, 21.6.

HRMS (ESI)  $m/z$ :  $[\text{M} + \text{H}]^+$  Calcd. for  $\text{C}_{26}\text{H}_{28}\text{BrN}_3\text{O}_3\text{SH}$  542.1108; found: 542.1111.

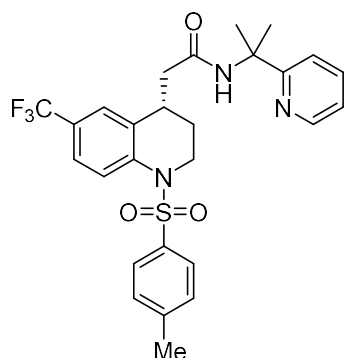

**(S)-N-(2-(pyridin-2-yl)propan-2-yl)-2-(1-tosyl-6-(trifluoromethyl)-1,2,3,4-tetrahydroquinolin-4-yl)acetamide 2r:**

A purification by flash chromatography in petroleum ether: ethyl acetate = 1:1 to give **2r** as a white solid (52.0 mg, 98%). The ee value was determined by HPLC analysis on a Chiralcel IA column (hexane/isopropanol = 80/20, flow = 1.0 mL/min) with  $t_r$  = 9.1 min (minor), 11.0 min (major): 96% ee.

$^1\text{H NMR}$  (400 MHz,  $\text{CDCl}_3$ )  $\delta$  8.54 – 8.41 (m, 1H), 7.97 – 7.90 (m, 1H), 7.77 – 7.65 (m, 2H), 7.59 – 7.50 (m, 2H), 7.46 – 7.33 (m, 3H), 7.26 – 7.18 (m, 3H), 3.96 – 3.70 (m, 2H), 3.37 – 3.17 (m, 1H), 2.37 (s, 3H), 2.32 (dd,  $J$  = 14.5, 5.8 Hz, 1H), 2.04 – 1.94 (m, 1H), 1.84 – 1.74 (m, 1H), 1.71 (s, 3H), 1.70 (s, 3H), 1.67 – 1.59 (m, 1H).

$^{13}\text{C NMR}$  (101 MHz,  $\text{CDCl}_3$ )  $\delta$  169.5, 164.2, 147.5, 144.4, 139.8, 137.4, 136.2, 133.2, 130.0, 127.3, 126.5 (q,  $^2J_{\text{C-F}}$  = 32.3 Hz), 125.8 (q,  $^3J_{\text{C-F}}$  = 3.0 Hz), 124.1 (q,  $^1J_{\text{C-F}}$  = 272.7 Hz), 124.1, 123.9 (q,  $^3J_{\text{C-F}}$  = 4.0 Hz), 122.2, 119.6, 56.7, 44.2, 43.9, 32.9, 27.5, 26.5, 21.6.

$^{19}\text{F NMR}$  (376 MHz,  $\text{CDCl}_3$ )  $\delta$  -62.19.

HRMS (ESI) m/z: [M + H]<sup>+</sup> Calcd. for C<sub>27</sub>H<sub>28</sub>F<sub>3</sub>N<sub>3</sub>O<sub>3</sub>SH 532.1876; found: 532.1877.

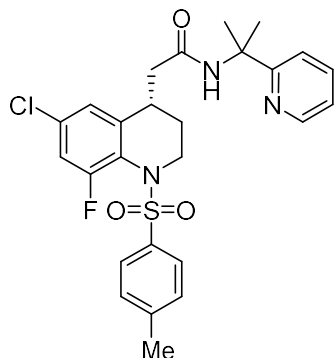

**(S)-2-(6-chloro-8-fluoro-1-tosyl-1,2,3,4-tetrahydroquinolin-4-yl)-N-(2-(pyridin-2-yl)propan-2-yl)acetamide 2s:**

A purification by flash chromatography in petroleum ether: ethyl acetate = 1:1 to give **2s** as pale yellow oil (27 mg, 52%). The ee value was determined by HPLC analysis on a Chiralcel AD-H column (hexane/isopropanol = 80/20, flow = 1.0 mL/min) with *t<sub>r</sub>* = 12.4 min (minor), 15.9 min (major): 93% ee.

**<sup>1</sup>H NMR (400 MHz, CDCl<sub>3</sub>)** δ 8.50 (d, *J* = 4.3 Hz, 1H), 7.86 – 7.76 (m, 3H), 7.72 (td, *J* = 7.8, 1.7 Hz, 1H), 7.38 (d, *J* = 8.1 Hz, 1H), 7.32 (d, *J* = 8.1 Hz, 1H), 7.24 – 7.16 (m, 1H), 7.10 – 7.03 (m, 1H), 6.99 (dd, *J* = 10.0, 2.3 Hz, 1H), 3.83 – 3.71 (m, 1H), 3.48 – 3.31 (m, 2H), 2.65 (dd, *J* = 14.5, 6.0 Hz, 1H), 2.43 (s, 3H), 2.37 (dd, *J* = 14.5, 8.8 Hz, 1H), 2.19 – 2.09 (m, 1H), 1.96 – 1.85 (m, 1H), 1.74 (s, 3H), 1.73 (s, 3H).

**<sup>13</sup>C NMR (101 MHz, CDCl<sub>3</sub>)** δ 169.7, 164.2, 157.0 (d, <sup>1</sup>*J*<sub>C-F</sub> = 255.5 Hz), 147.7, 144.1, 139.7, 137.3 (d, <sup>3</sup>*J*<sub>C-F</sub> = 6.1 Hz), 131.7 (d, <sup>3</sup>*J*<sub>C-F</sub> = 11.1 Hz), 129.8, 127.7, 127.6, 124.4 (d, <sup>2</sup>*J*<sub>C-F</sub> = 12.1 Hz), 123.9 (d, <sup>4</sup>*J*<sub>C-F</sub> = 3.0 Hz), 122.1, 119.6, 115.3 (d, <sup>2</sup>*J*<sub>C-F</sub> = 25.2 Hz), 56.8, 44.8, 44.0, 32.6, 32.6, 28.7, 27.6, 27.5, 21.7.

**<sup>19</sup>F NMR (376 MHz, CDCl<sub>3</sub>)** δ -112.55.

HRMS (ESI) m/z: [M + Na]<sup>+</sup> Calcd. for C<sub>26</sub>H<sub>28</sub>ClFN<sub>3</sub>O<sub>3</sub>SNa 538.1338; found: 538.1339.

### 3. Derivatizations

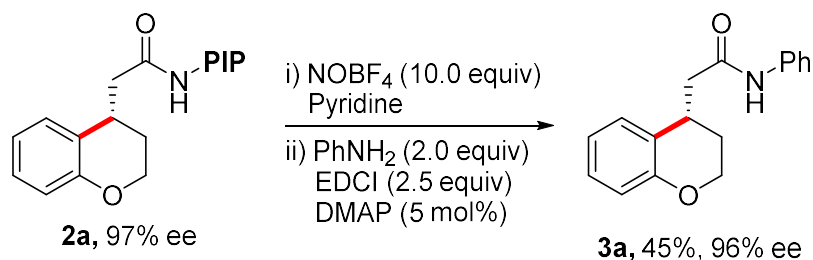

To a 25 mL flask was added aliphatic amide **2a** (0.10 mmol) and pyridine (2.0 mL). The reaction mixture was cooled to  $-30\text{ }^\circ\text{C}$  and then  $\text{NOBF}_4$  (10.0 equiv) was added for three times. The reaction was stirred in  $-30\text{ }^\circ\text{C}$  for 2 h then warmed to room temperature and stirred for another 5 h. The reaction mixture was acidified to pH 3 with aq. HCl (3 M), and extracted with EtOAc (10 mL x 3). The organic layers were combined, washed with brine, dried over anhydrous  $\text{Na}_2\text{SO}_4$ , and concentrated to give compound without further purification. Then  $\text{PhNH}_2$  (2.0 equiv), EDCI (2.5 equiv), DMAP (5 mol%), DCM (2 mL) was added and stirred at rt for 12 h. The reaction mixture was diluted with  $\text{H}_2\text{O}$ , and extracted with DCM (10 mL x 3). The organic layers were combined, washed with brine, dried over anhydrous  $\text{Na}_2\text{SO}_4$ , Purification by flash chromatography.

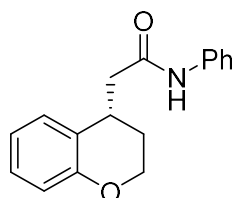

#### **(S)-2-(chroman-4-yl)-N-phenylacetamide 3a:**

**3a** was a known compound<sup>2</sup> and purification by flash chromatography in petroleum ether: ethyl acetate = 3:1 to give **3a** as yellow oil (12.0 mg, 45%). The ee value was determined by HPLC analysis on a Chiralcel OD-H column (hexane/isopropanol = 90/10, flow = 1.0 mL/min) with  $t_r$  = 33.2 min (minor), 38.6 min (major): 96% ee.

$^1\text{H NMR}$  (400 MHz,  $\text{CDCl}_3$ )  $\delta$  7.52 – 7.43 (m, 2H), 7.33 (t,  $J$  = 7.9 Hz, 2H), 7.21 – 7.07 (m, 4H), 6.90 – 6.79 (m, 2H), 4.27 – 4.14 (m, 2H), 3.58 – 3.48 (m, 1H), 2.84 (dd,  $J$  = 14.7, 5.7 Hz, 1H), 2.55 (dd,  $J$  = 14.7, 8.6 Hz, 1H), 2.28 – 2.19 (m, 1H), 1.96 – 1.84 (m, 1H).

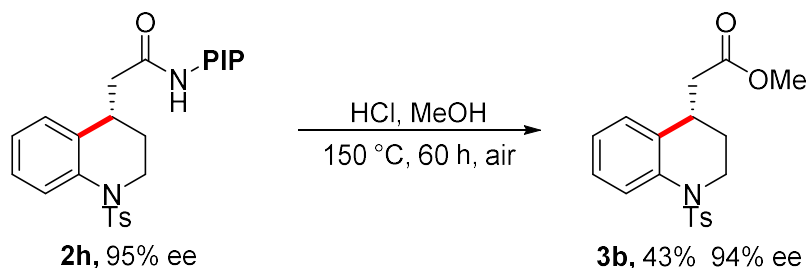

To a 50 mL Schlenk tube was added aliphatic amide **2h** (0.10 mmol) and MeOH: HCl (4 mL: 1 mL). The reaction was stirred at 150 °C (oil bath) for 60 h. The reaction mixture was alkalinized to pH 10 with aq. Na<sub>2</sub>CO<sub>3</sub>, and extracted with EtOAc (10 mL x 3). The organic layers were combined, washed with brine, dried over anhydrous Na<sub>2</sub>SO<sub>4</sub>, Purified by preparative TLC.

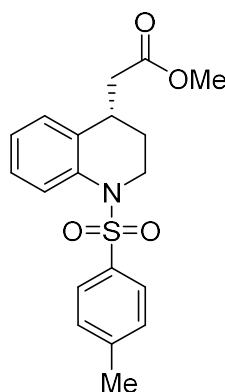

**methyl (*S*)-2-(1-(tosyl-1,2,3,4-tetrahydroquinolin-4-yl)acetate 3b:**

A purification by preparative TLC in petroleum ether: ethyl acetate = 3:1 to give **3b** as a yellow oil (15.4 mg, 43%). The ee value was determined by HPLC analysis on a Chiralcel AD-H column (hexane/isopropanol = 80/20, flow = 1.0 mL/min) with *t<sub>r</sub>* = 6.8 min (minor), 7.6 min (major): 94% ee.

**<sup>1</sup>H NMR (400 MHz, CDCl<sub>3</sub>)** δ 7.83 (d, *J* = 8.0 Hz, 1H), 7.47 (d, *J* = 8.4 Hz, 2H), 7.24 – 7.18 (m, 3H), 7.13 – 7.05 (m, 2H), 3.84 (ddd, *J* = 13.9, 7.3, 4.5 Hz, 1H), 3.88 – 3.80 (m, 1H), 3.79 – 3.70 (m, 1H), 3.64 (s, 3H), 3.11 – 3.01 (m, 1H), 2.41 (dd, *J* = 15.6, 4.8 Hz, 1H), 2.38 (s, 3H), 1.99 (dd, *J* = 15.8, 9.9 Hz, 1H), 1.82 – 1.72 (m, 1H), 1.51 – 1.42 (m, 1H).

**<sup>13</sup>C NMR (101 MHz, CDCl<sub>3</sub>)** δ 172.4, 144.0, 136.7, 136.5, 132.5, 129.8, 128.3, 127.3, 125.3, 125.1, 51.9, 44.149, 40.8, 32.4, 26.7, 21.7.

HRMS (ESI) *m/z*: [M + Na]<sup>+</sup> Calcd. for C<sub>19</sub>H<sub>21</sub>NO<sub>4</sub>SNa 382.1083; found: 382.1085.

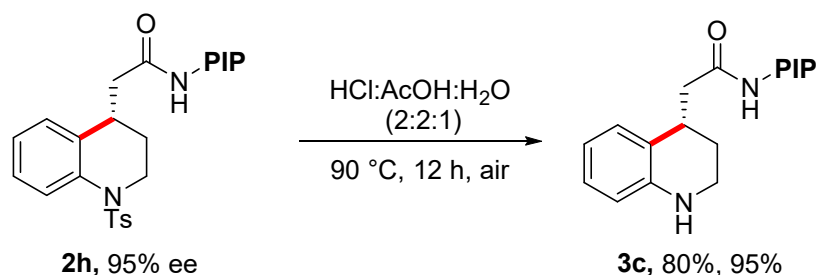

To a 50 mL Schlenk tube was added aliphatic amide **2h** (0.10 mmol) and HCl: CH<sub>3</sub>COOH: H<sub>2</sub>O (2 mL: 2 mL: 1 mL). The reaction was stirred at 90 °C (oil bath) for 12 h. The reaction mixture was alkalinized to pH 10 with aq. NaOH, and extracted with EtOAc (10 mL x 3). The organic layers were combined, dried over anhydrous Na<sub>2</sub>SO<sub>4</sub>, Purified by preparative TLC.

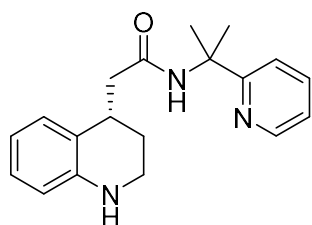

**(S)-N-(2-(pyridin-2-yl)propan-2-yl)-2-(1,2,3,4-tetrahydroquinolin-4-yl)acetamide 3c:**

A purification by preparative TLC in petroleum ether: ethyl acetate = 1:1 to give **3c** as a yellow oil (24.7 mg, 80%). The ee value was determined by HPLC analysis on a Chiralcel AS-H column (hexane/isopropanol = 80/20, flow = 1.0 mL/min) with *t<sub>r</sub>* = 5.4 min (minor), 6.8 min (major): 95% ee.

**<sup>1</sup>H NMR (400 MHz, CDCl<sub>3</sub>)** δ 8.48 (d, *J* = 5.0 Hz, 1H), 7.76 – 7.64 (m, 2H), 7.40 (d, *J* = 8.1 Hz, 1H), 7.18 (dd, *J* = 7.5, 5.0 Hz, 1H), 7.08 (d, *J* = 7.6 Hz, 1H), 6.97 (t, *J* = 7.6 Hz, 1H), 6.60 (t, *J* = 7.4 Hz, 1H), 6.48 (d, *J* = 8.0 Hz, 1H), 3.46 – 3.37 (m, 1H), 3.36 – 3.24 (m, 2H), 2.68 (dd, *J* = 14.2, 5.7 Hz, 1H), 2.40 (dd, *J* = 14.2, 9.2 Hz, 1H), 2.07 – 1.97 (m, 1H), 1.88 – 1.80 (m, 1H), 1.76 (s, 6H).

**<sup>13</sup>C NMR (101 MHz, CDCl<sub>3</sub>)** δ 170.9, 164.6, 147.7, 144.5, 137.2, 129.0, 127.3, 124.2, 122.0, 119.6, 117.1, 114.4, 56.7, 45.2, 38.7, 32.8, 27.7, 27.6, 26.8.

HRMS (ESI) *m/z*: [M + H]<sup>+</sup> Calcd. for C<sub>19</sub>H<sub>23</sub>N<sub>3</sub>OH 310.1914; found: 310.1915.

## 4. X-Ray Crystallographic Data

A single crystal of **2k** suitable for X-ray crystallography was obtained by crystallization via evaporation from its hexane/ethyl acetate solution.

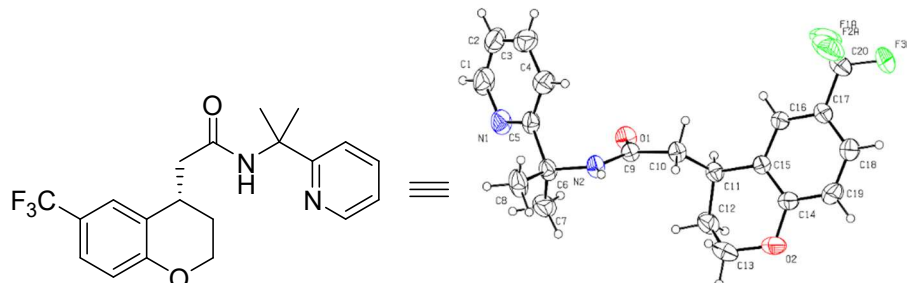

**Table S1.** Crystal data and structure refinement for **2k**

|                                             |                                                                              |
|---------------------------------------------|------------------------------------------------------------------------------|
| Identification code                         | compound <b>2k</b>                                                           |
| Empirical formula                           | C <sub>20</sub> H <sub>21</sub> F <sub>3</sub> N <sub>2</sub> O <sub>2</sub> |
| Formula weight                              | 378.39                                                                       |
| Temperature/K                               | 310                                                                          |
| Crystal system                              | orthorhombic                                                                 |
| Space group                                 | P43                                                                          |
| a/Å                                         | 10.1440(7)                                                                   |
| b/Å                                         | 10.1440(7)                                                                   |
| c/Å                                         | 19.1105(14)                                                                  |
| α/°                                         | 90                                                                           |
| β/°                                         | 90                                                                           |
| γ/°                                         | 90                                                                           |
| Volume/Å <sup>3</sup>                       | 1966.5(3)                                                                    |
| Z                                           | 4                                                                            |
| ρ <sub>calc</sub> /cm <sup>3</sup>          | 1.278                                                                        |
| μ/mm <sup>-1</sup>                          | 0.966                                                                        |
| F(000)                                      | 792.0                                                                        |
| Crystal size/mm <sup>3</sup>                | 0.03 × 0.04 × 0.36                                                           |
| Radiation                                   | CuKα (λ = 1.54178)                                                           |
| 2θ range for data collection/°              | 4.36 to 68.25                                                                |
| Index ranges                                | -12 ≤ h ≤ 12, -12 ≤ k ≤ 12, -23 ≤ l ≤ 22                                     |
| Reflections collected                       | 27682                                                                        |
| Independent reflections                     | 3546 [R <sub>int</sub> = 0.0453, R <sub>sigma</sub> = 0.0264]                |
| Data/restraints/parameters                  | 3546/7/274                                                                   |
| Goodness-of-fit on F <sup>2</sup>           | 1.055                                                                        |
| Final R indexes [I >= 2σ (I)]               | R <sub>1</sub> = 0.0340, wR <sub>2</sub> = 0.0889                            |
| Final R indexes [all data]                  | R <sub>1</sub> = 0.0415, wR <sub>2</sub> = 0.0923                            |
| Largest diff. peak/hole / e Å <sup>-3</sup> | 0.127/-0.175                                                                 |
| Flack parameter                             | -0.05(5)                                                                     |



## 5. References

- 1) Y. Feng, Y. Wang, B. Landgraf, S. Liu and G. Chen, Facile Benzo-Ring Construction via Palladium-Catalyzed Functionalization of Unactivated  $sp^3$  C–H Bonds under Mild Reaction Conditions, *Org. Lett.* **2010**, *12*, 3414-3417.
- 2) Y.-Q. Han, Q. Zhang, X. Yang, M.-X. Jiang, Y. Ding and B.-F. Shi, Pd(II)-Catalyzed enantioselective intramolecular arylation of unbiased  $C(sp^3)$ –H bonds to construct chiral benzo-ring compounds, *Org. Lett.* 2021, **23**, 97-101.

## 6. NMR Spectra

### 1a, $^1\text{H}$ NMR, 400 MHz, $\text{CDCl}_3$

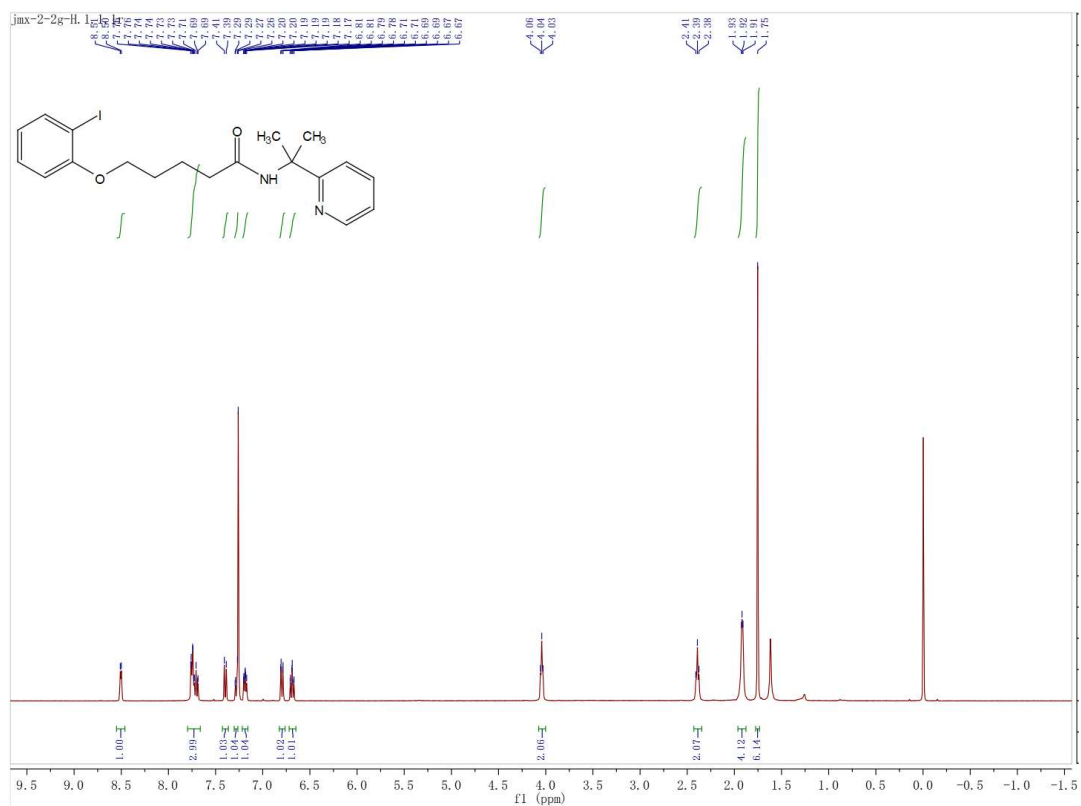

### 1a, $^{13}\text{C}$ NMR, 101 MHz, $\text{CDCl}_3$

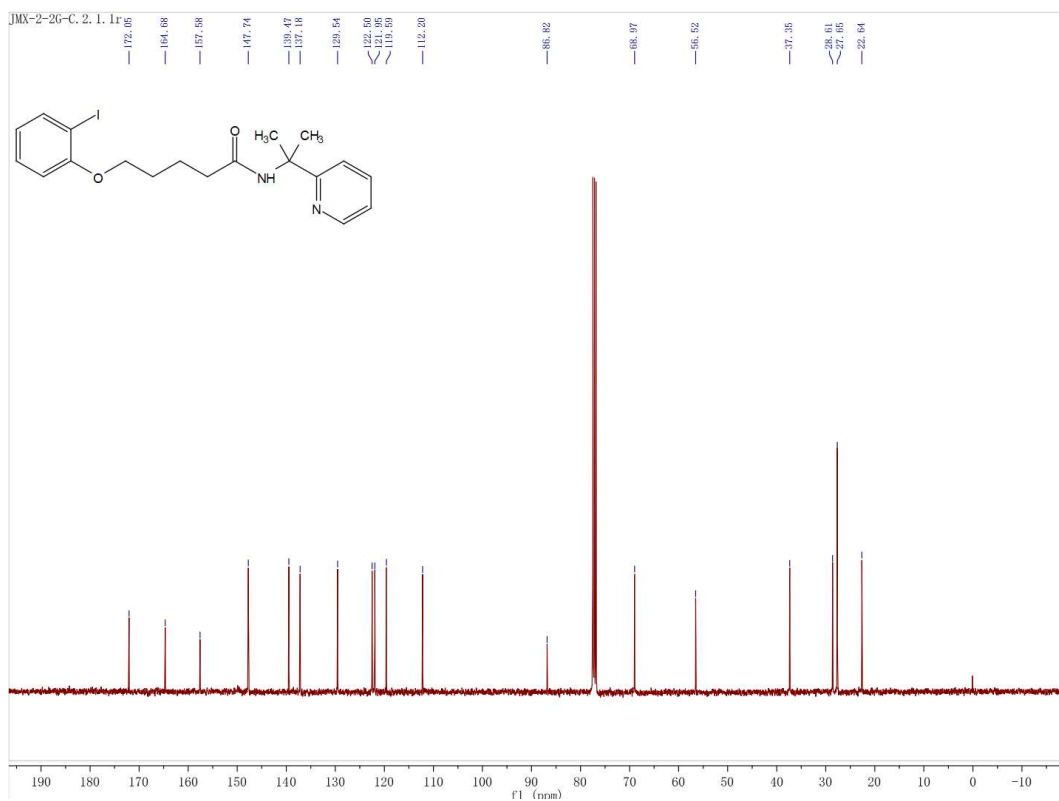

**1b, <sup>1</sup>H NMR, 400 MHz, CDCl<sub>3</sub>**

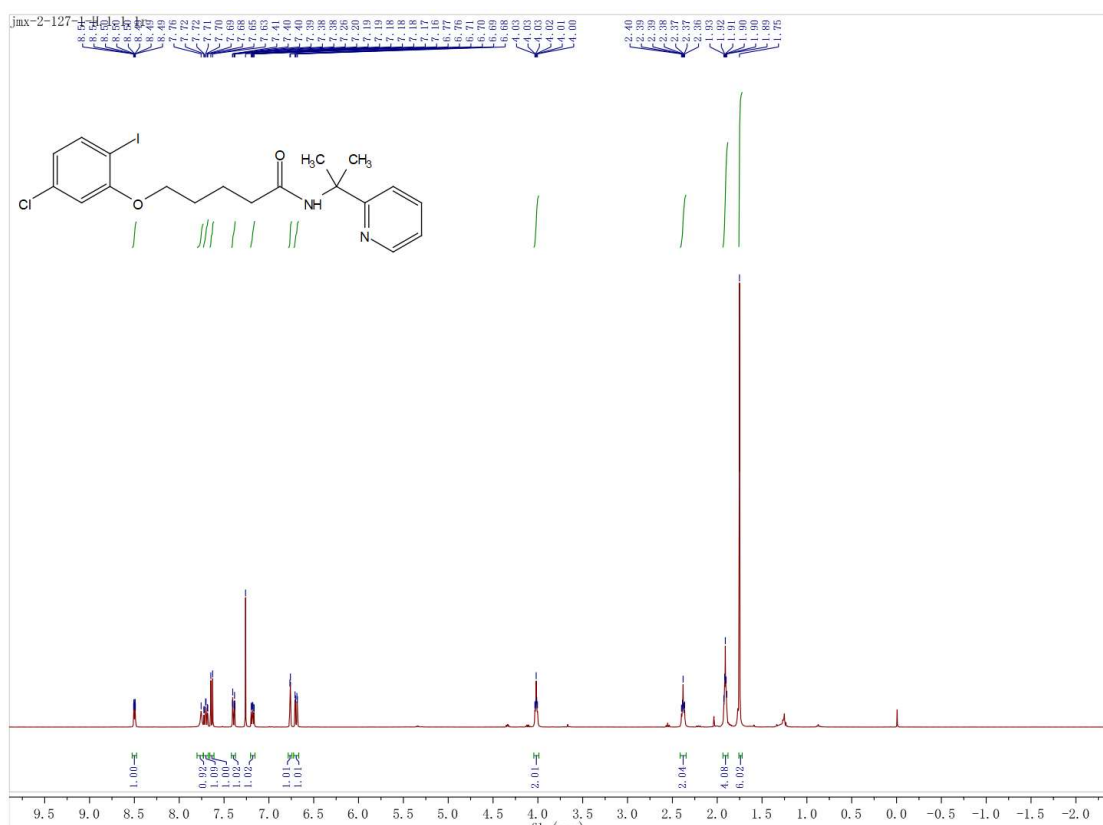

**1b, <sup>13</sup>C NMR, 101 MHz, CDCl<sub>3</sub>**

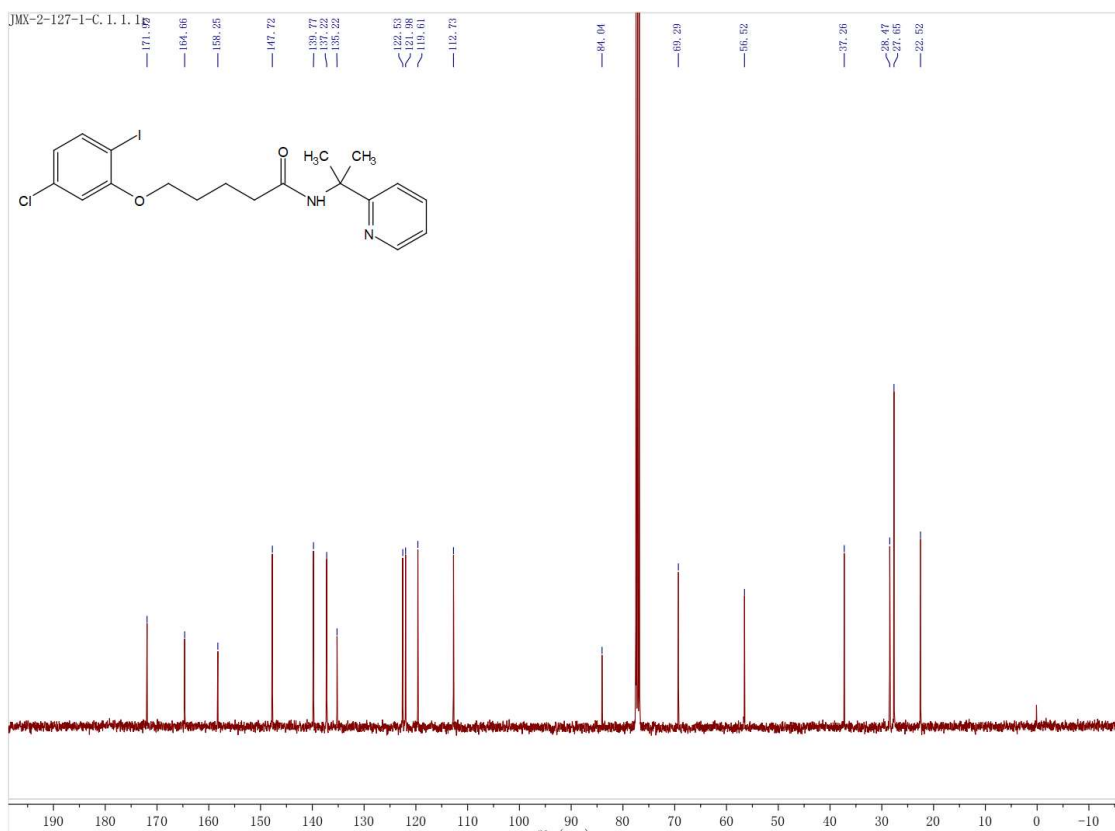

**1c, <sup>1</sup>H NMR, 400 MHz, CDCl<sub>3</sub>**

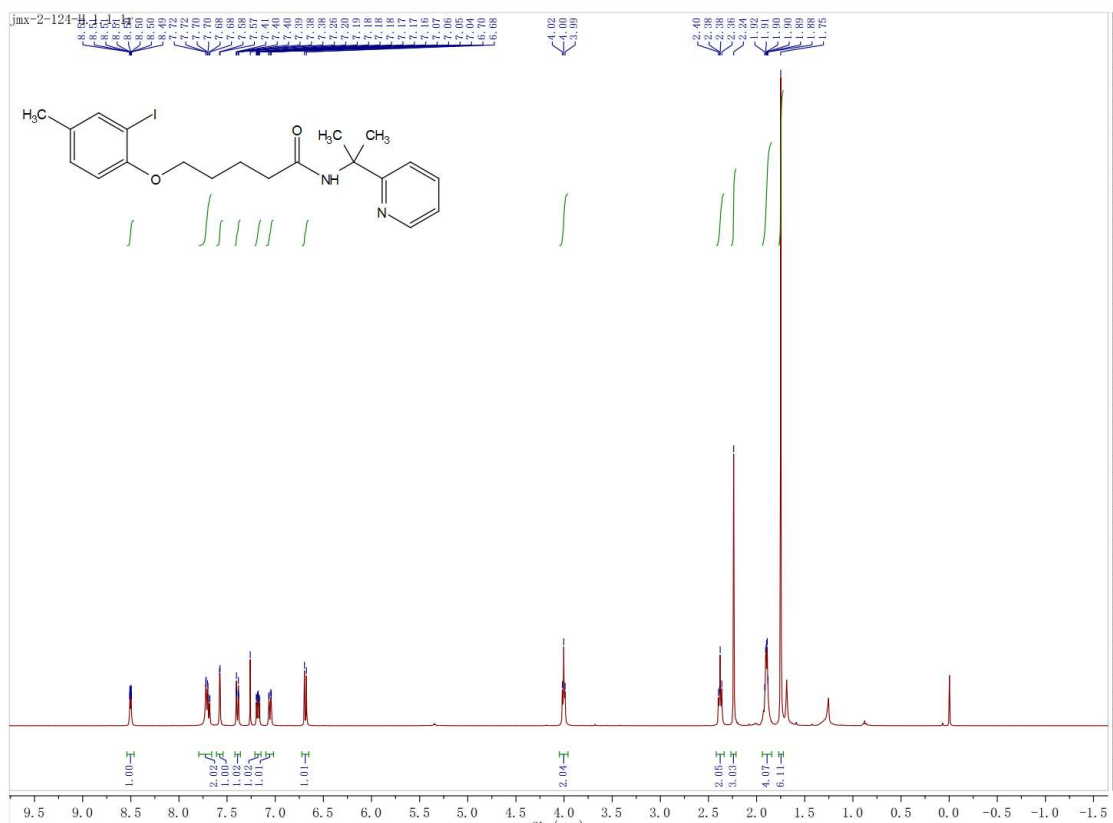

**1c, <sup>13</sup>C NMR, 101 MHz, CDCl<sub>3</sub>**

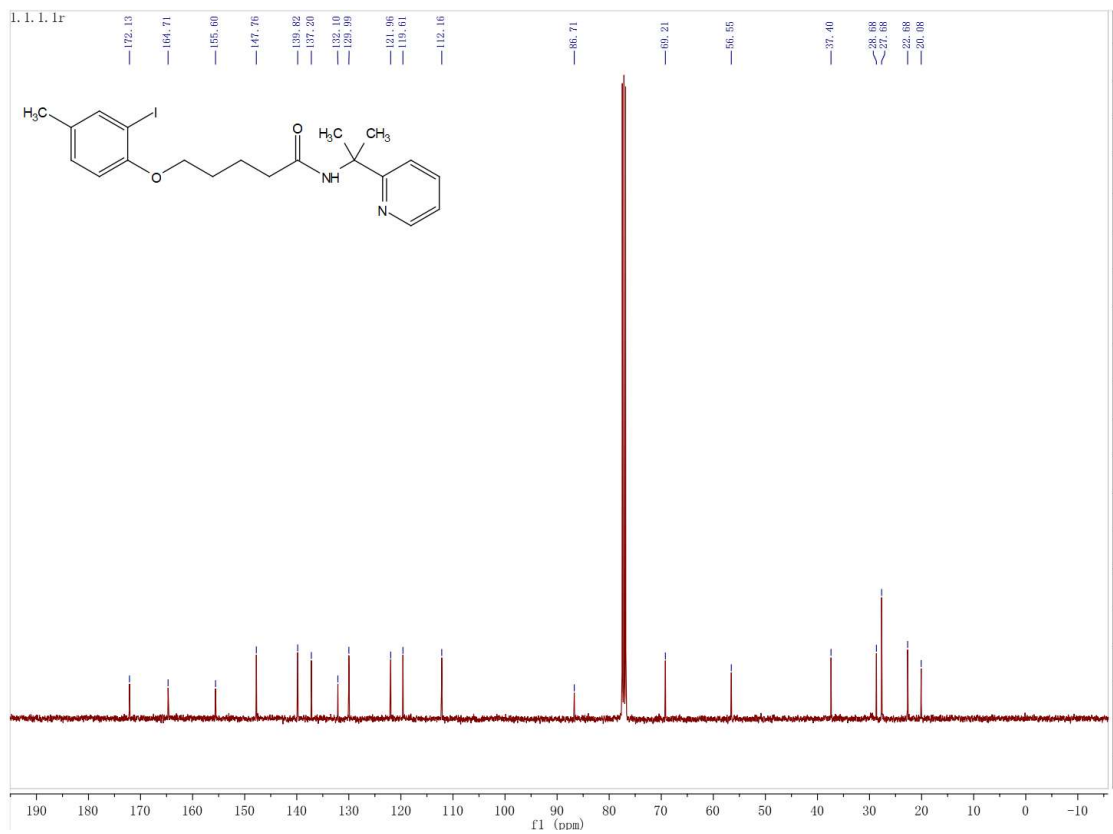

1d, <sup>1</sup>H NMR, 400 MHz, CDCl<sub>3</sub>

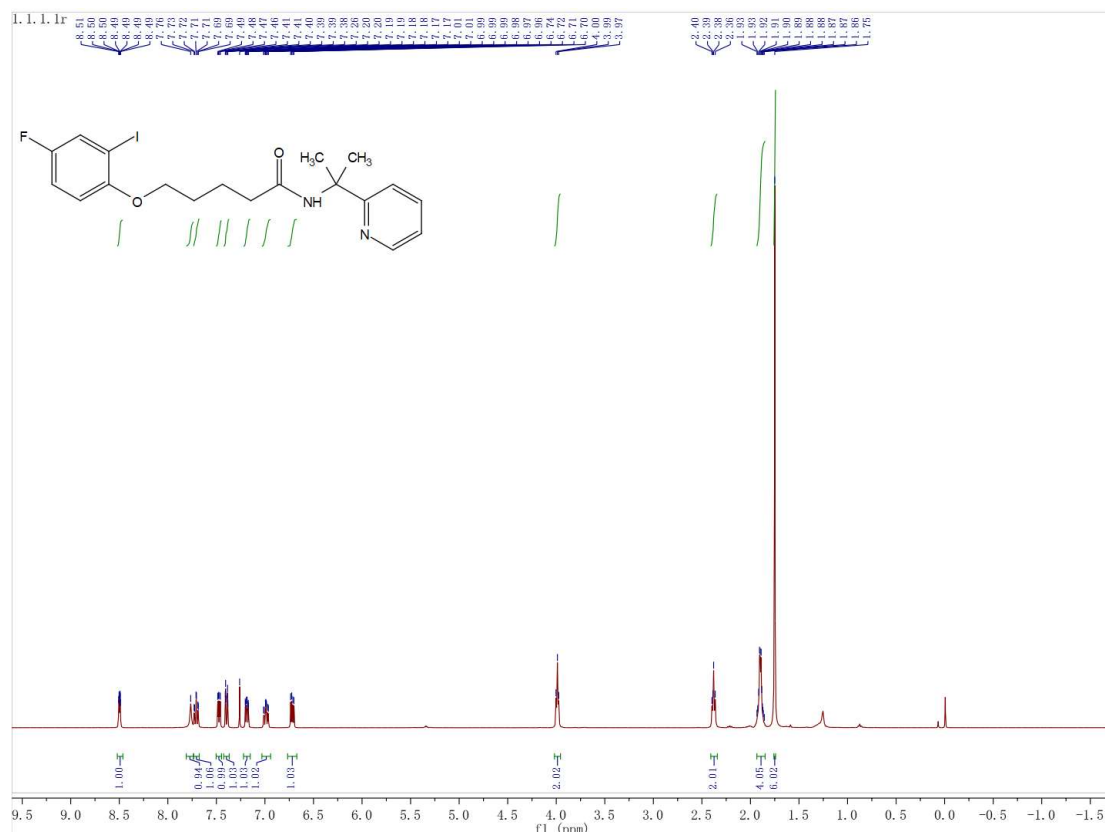

1d, <sup>13</sup>C NMR, 101 MHz, CDCl<sub>3</sub>

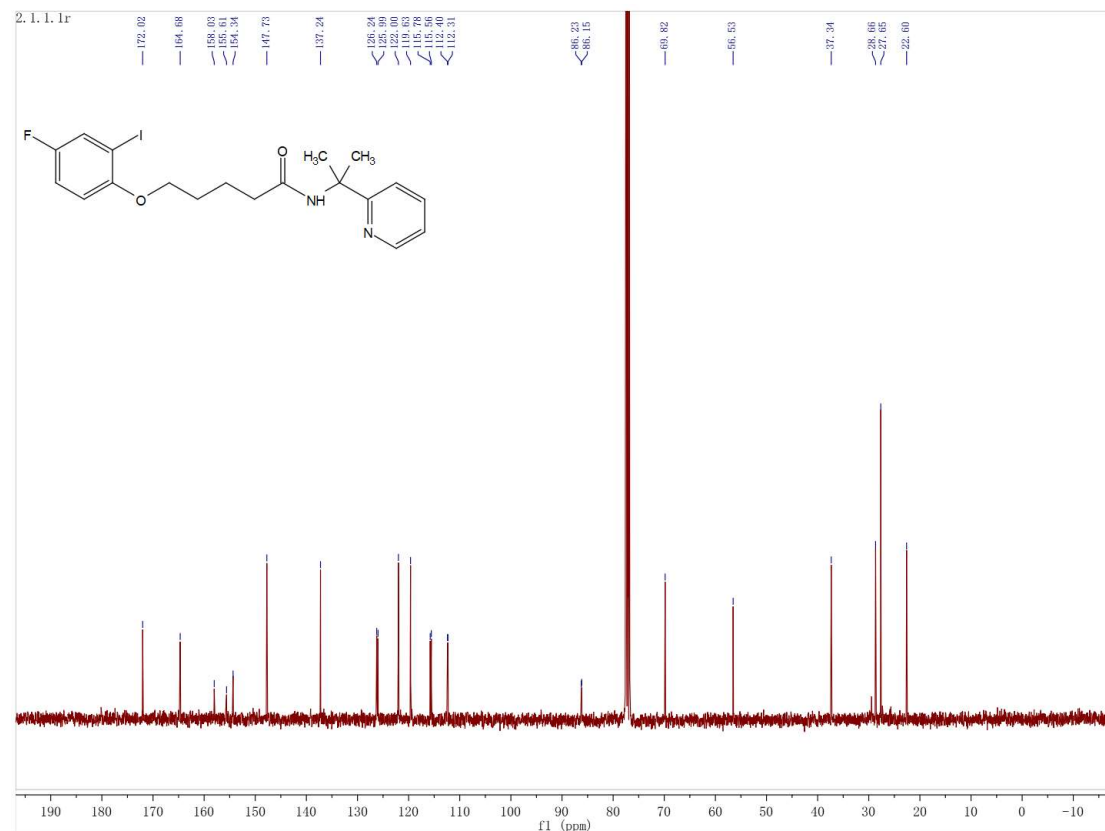

**1d,  $^{19}\text{F}$  NMR, 376 MHz,  $\text{CDCl}_3$**

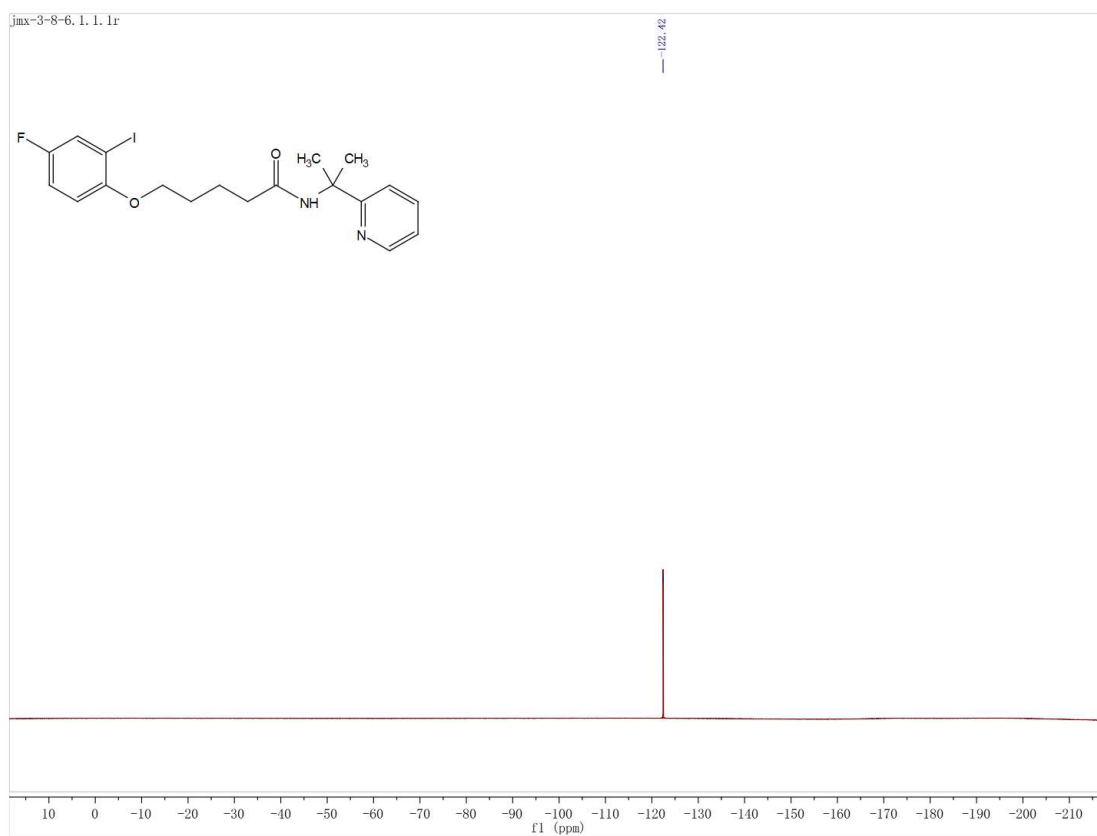

1e, <sup>1</sup>H NMR, 400 MHz, CDCl<sub>3</sub>

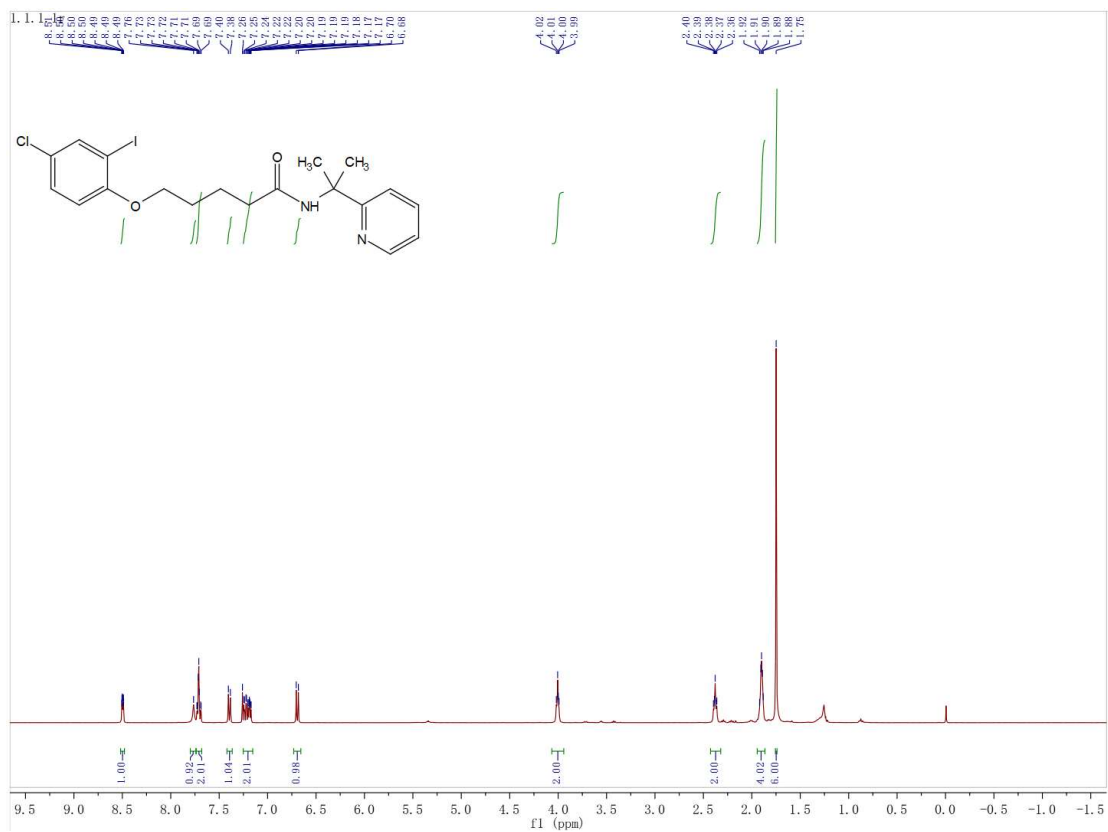

1e, <sup>13</sup>C NMR, 101 MHz, CDCl<sub>3</sub>

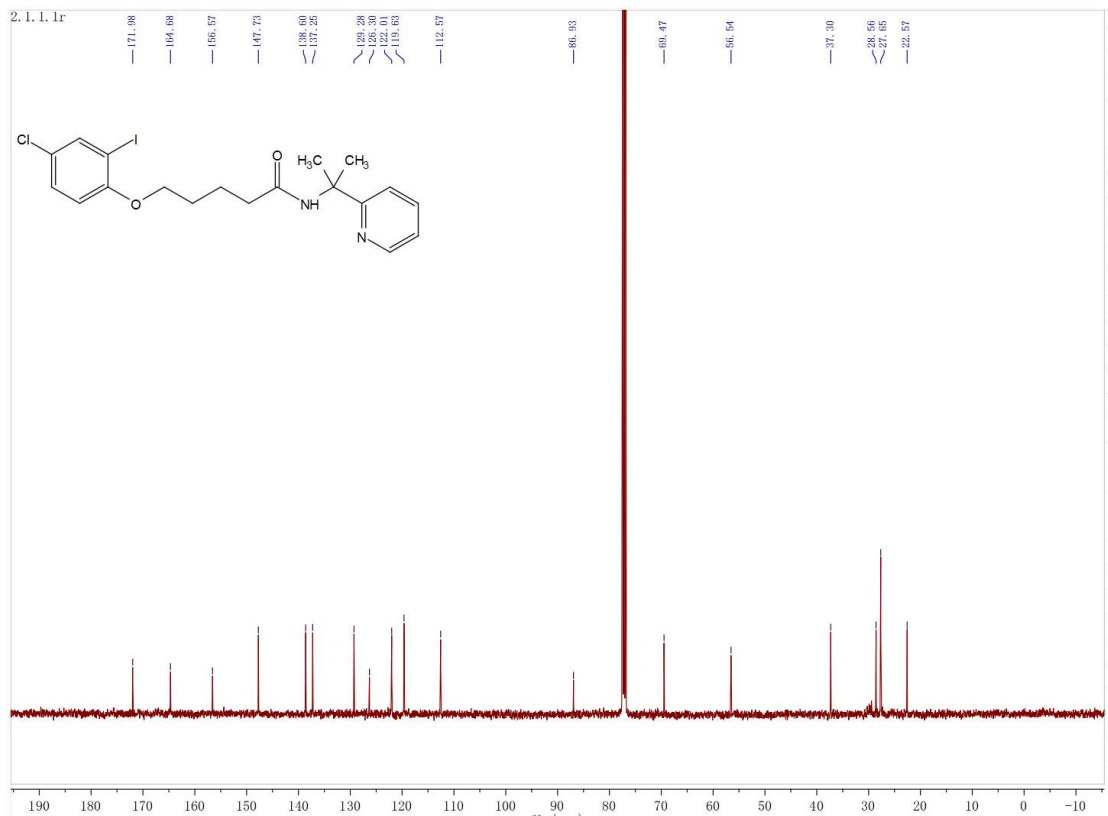

**1f, <sup>1</sup>H NMR, 400 MHz, CDCl<sub>3</sub>**

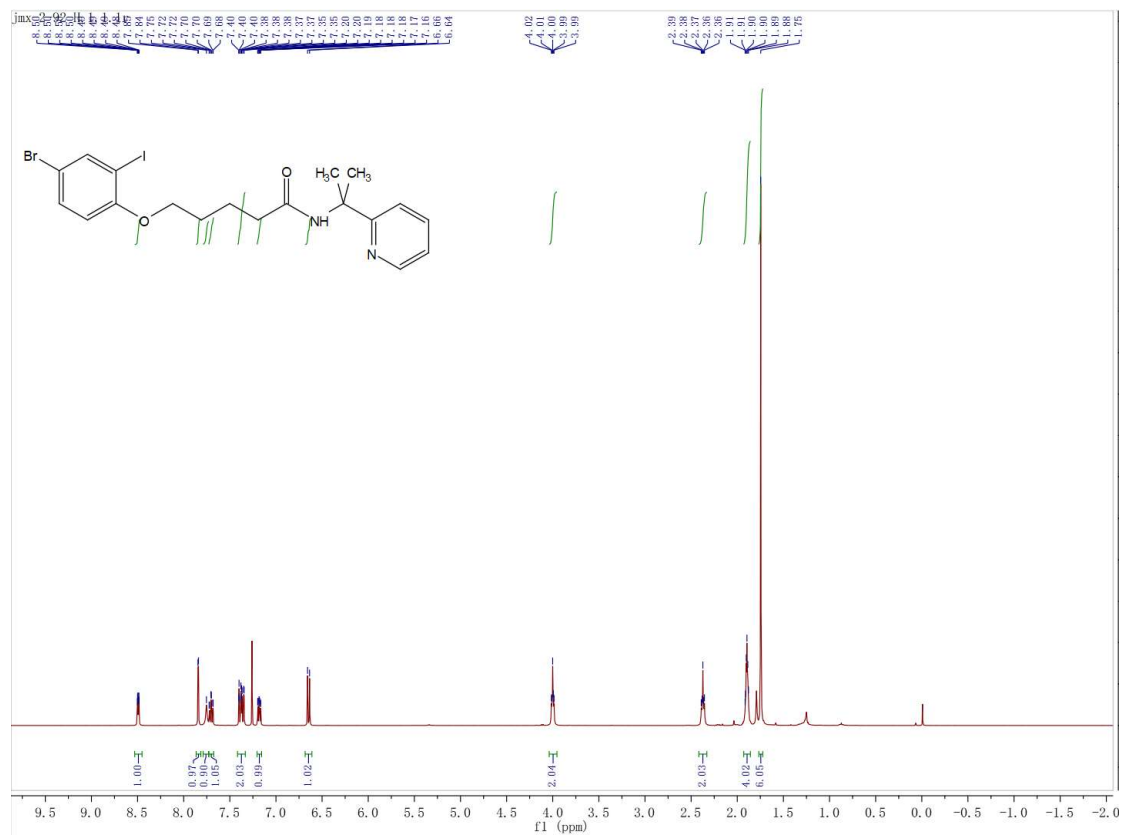

**1f, <sup>13</sup>C NMR, 101 MHz, CDCl<sub>3</sub>**

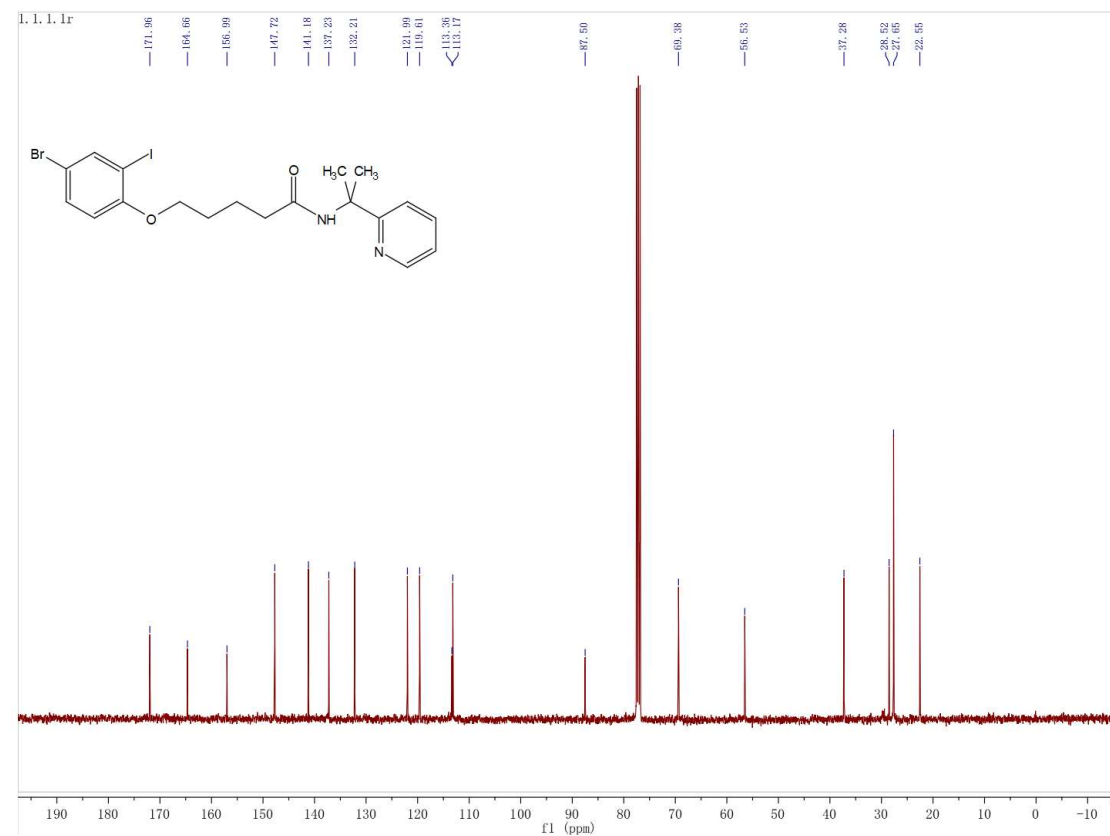



**1g, <sup>1</sup>H NMR, 400 MHz, CDCl<sub>3</sub>**

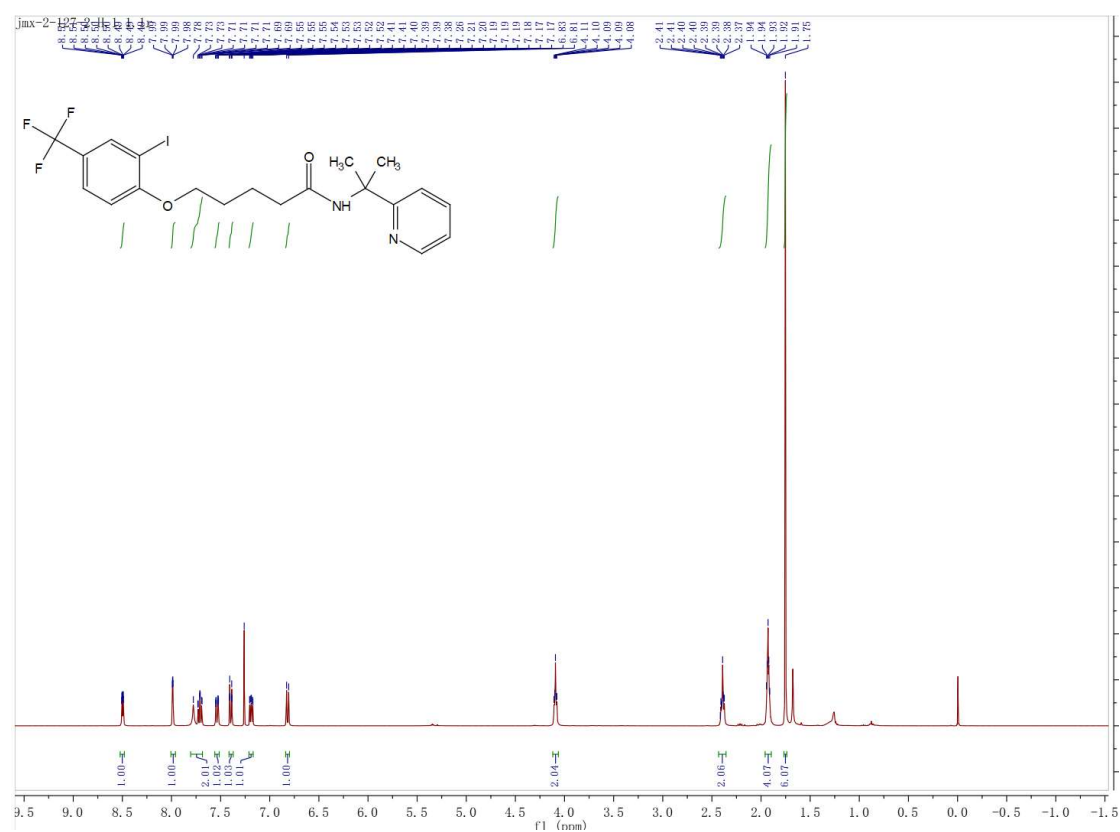

**1g, <sup>13</sup>C NMR, 101 MHz, CDCl<sub>3</sub>**

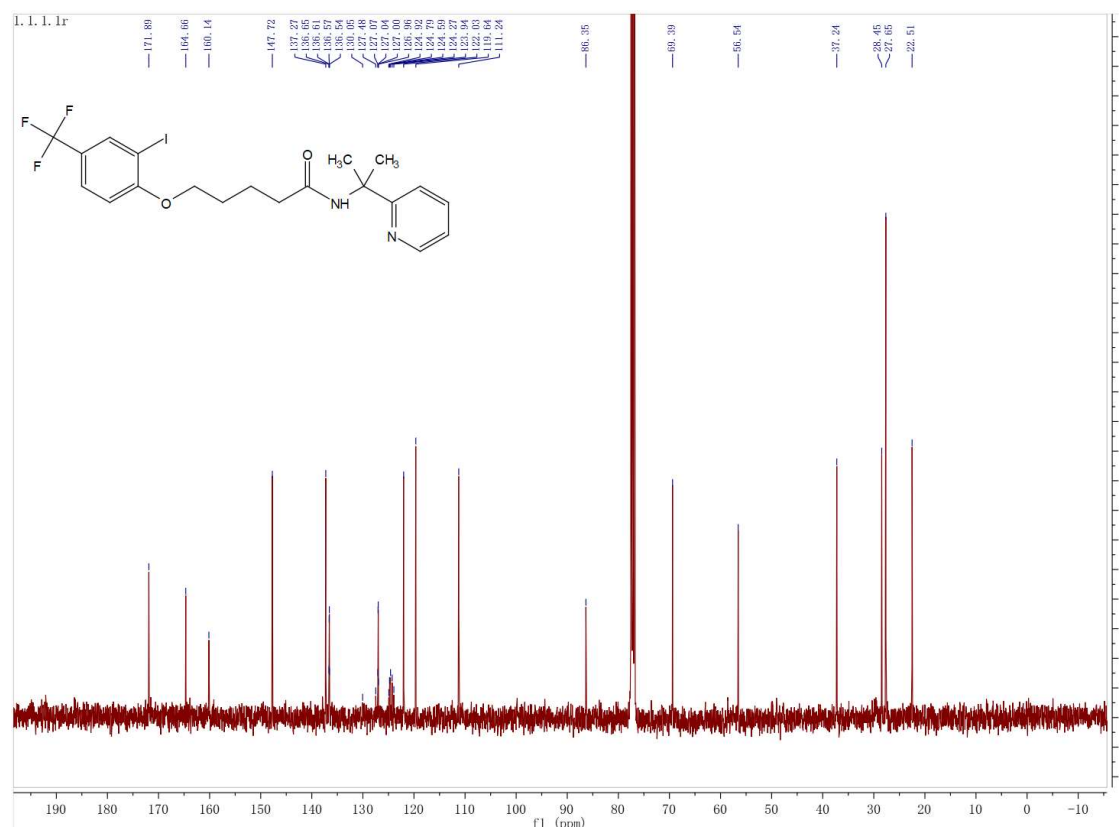

**1g,  $^{19}\text{F}$  NMR, 376 MHz,  $\text{CDCl}_3$**

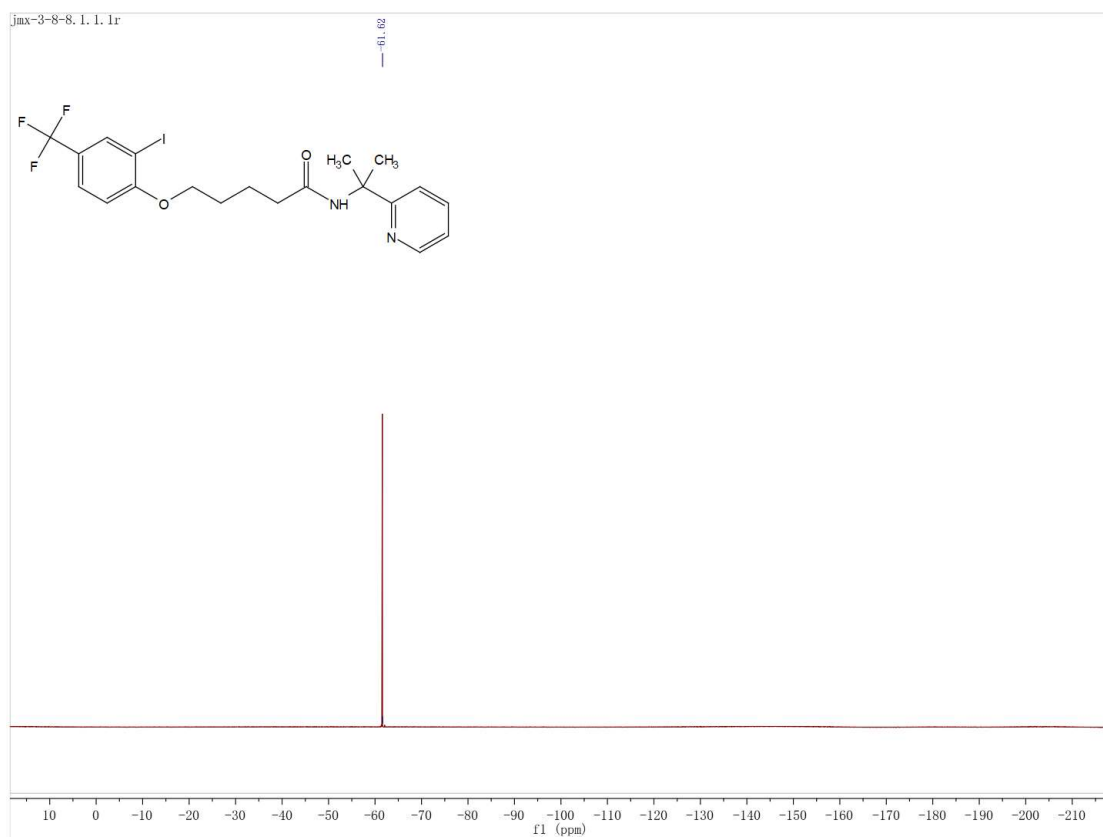

**1h, <sup>1</sup>H NMR, 400 MHz, CDCl<sub>3</sub>**

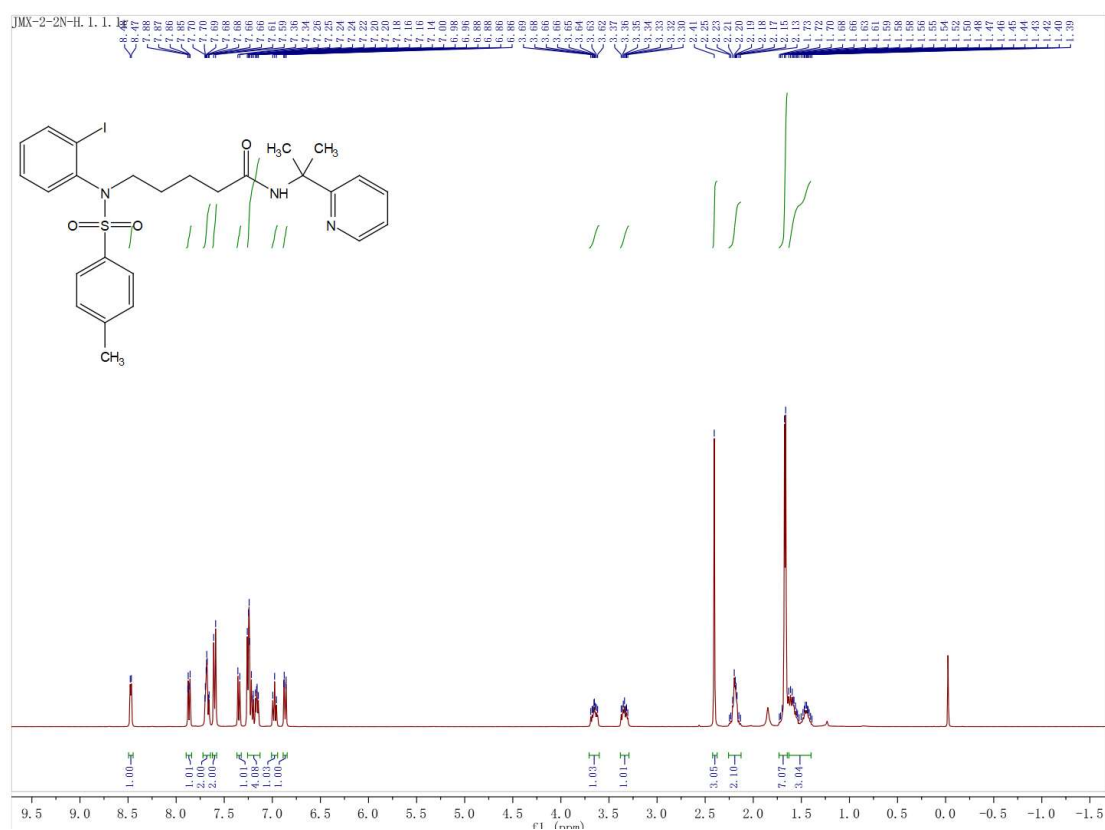

**1h, <sup>13</sup>C NMR, 101 MHz, CDCl<sub>3</sub>**

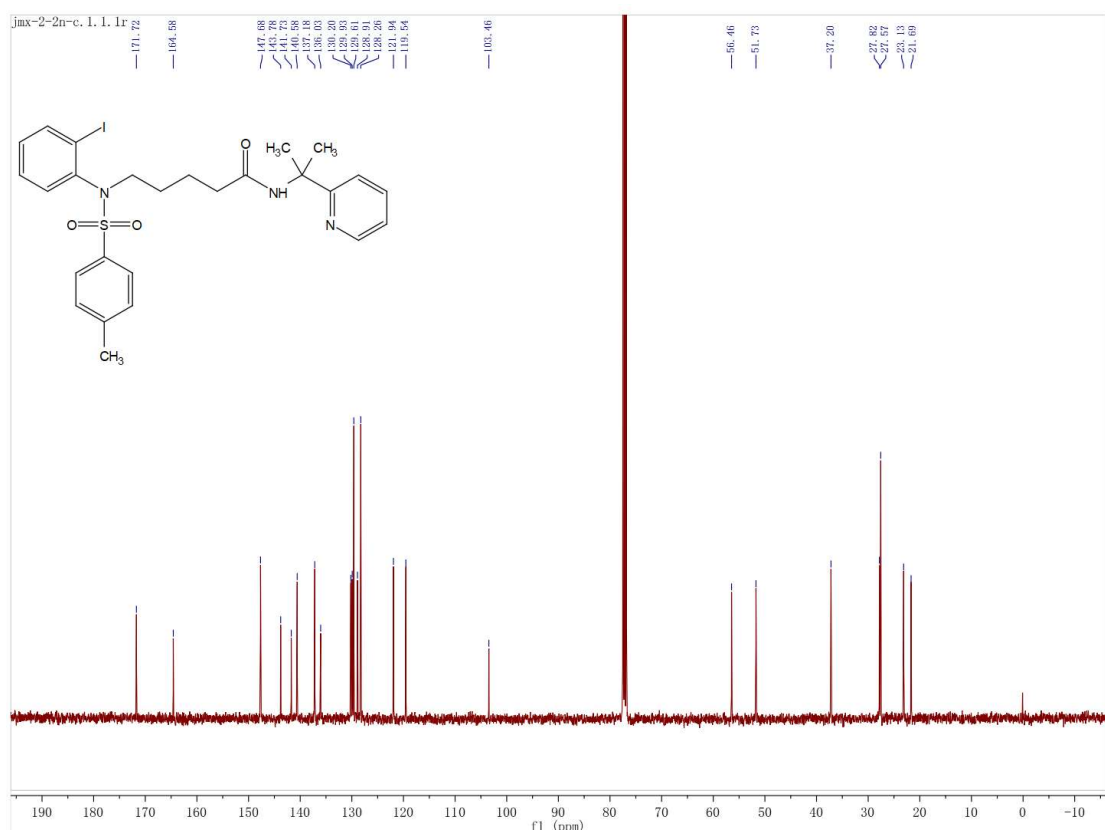

**1i, <sup>1</sup>H NMR, 400 MHz, CDCl<sub>3</sub>**

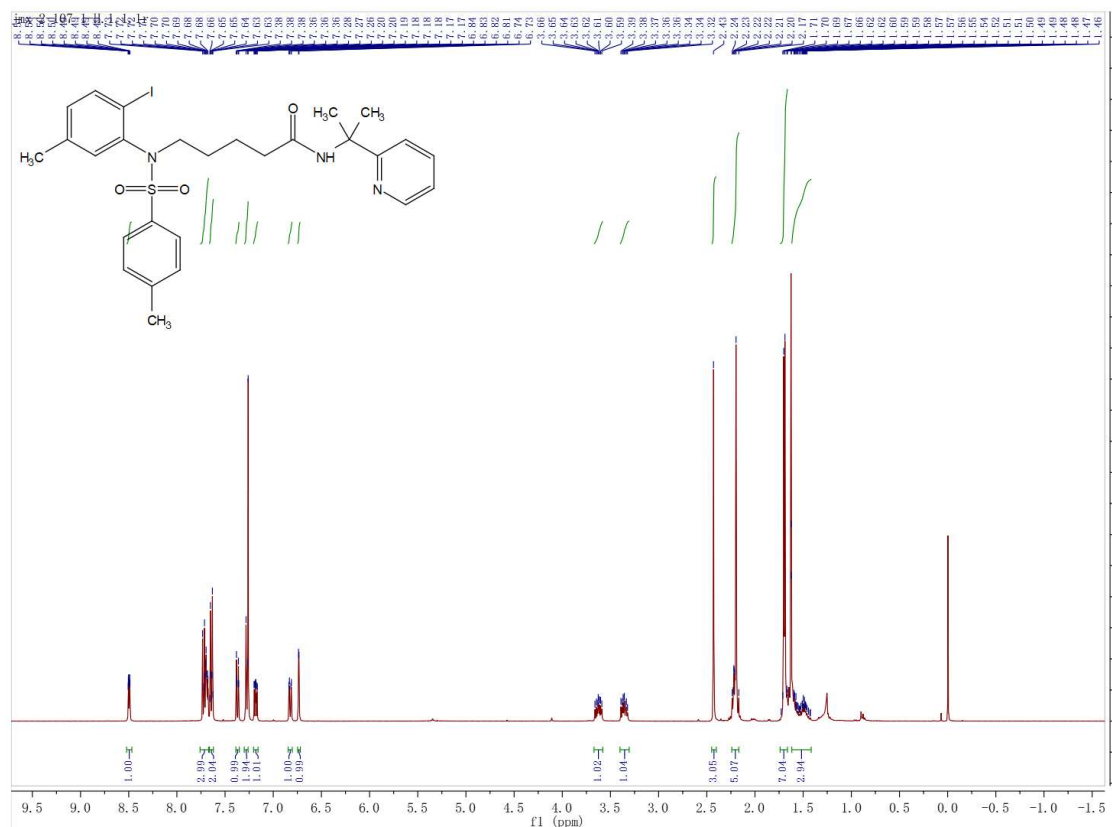

**1i, <sup>13</sup>C NMR, 101 MHz, CDCl<sub>3</sub>**

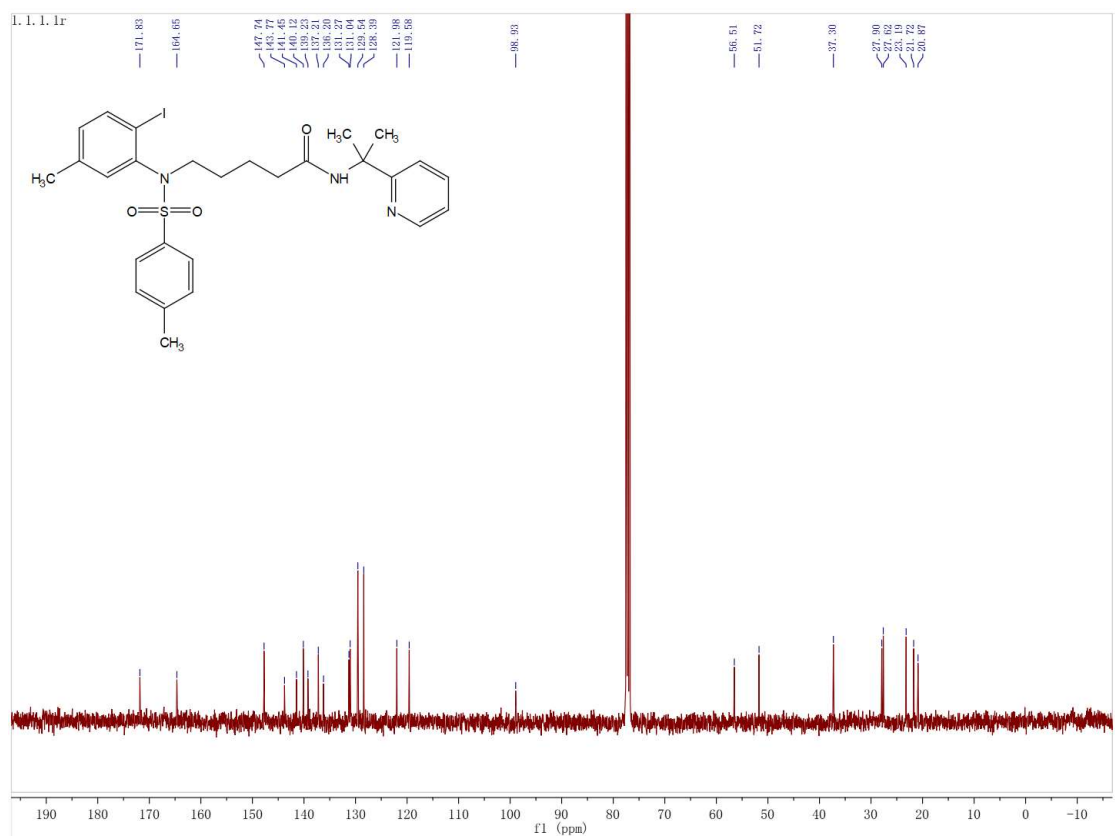

**1j, <sup>1</sup>H NMR, 400 MHz, CDCl<sub>3</sub>**

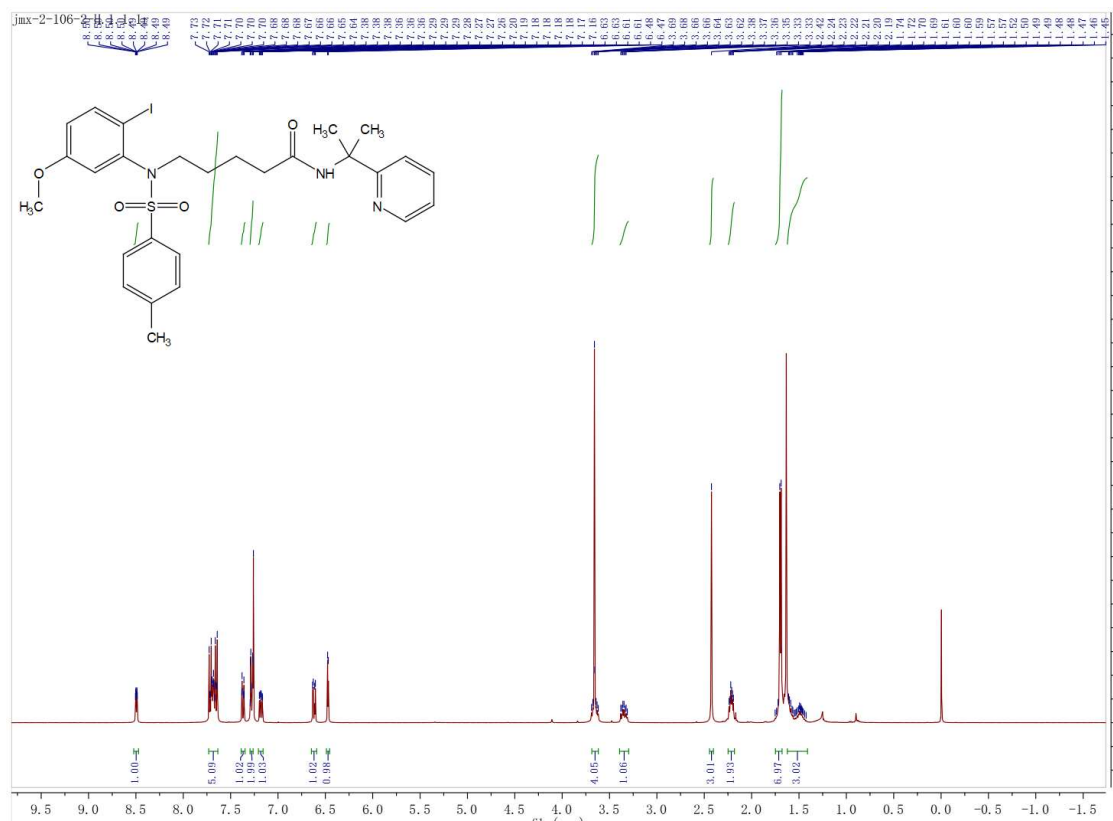

**1j, <sup>13</sup>C NMR, 101 MHz, CDCl<sub>3</sub>**

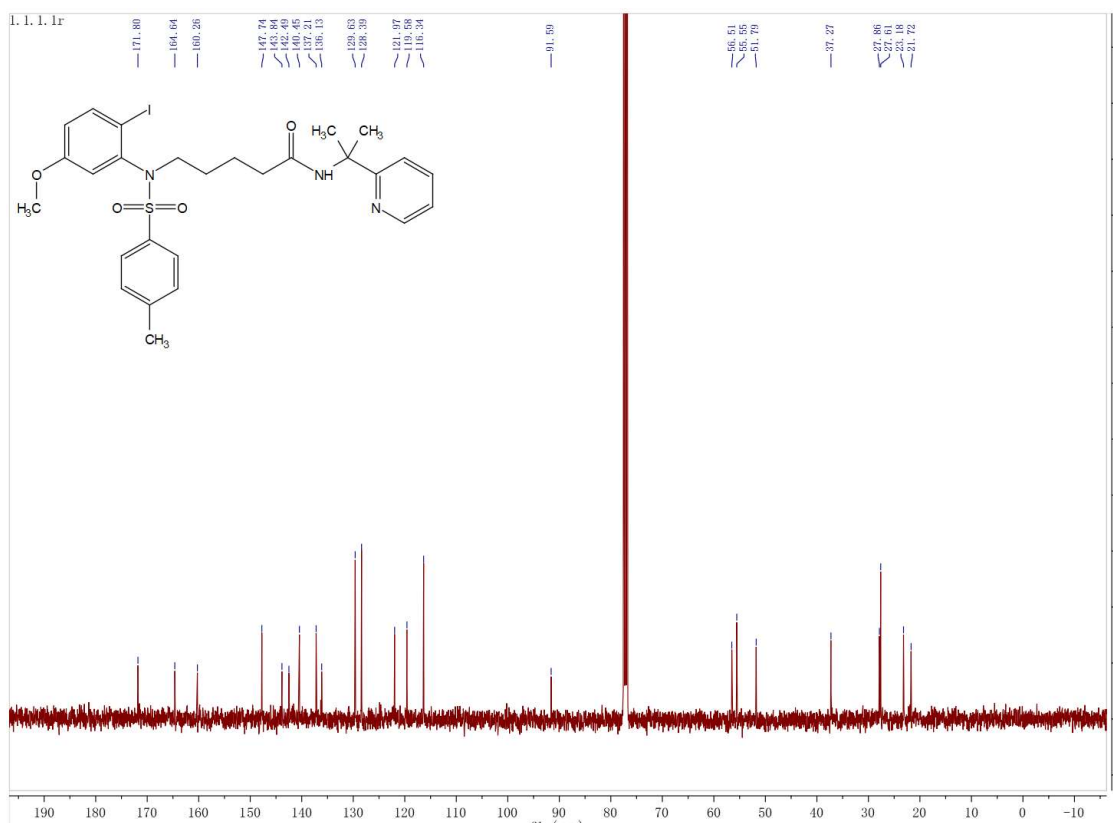

**1k, <sup>1</sup>H NMR, 400 MHz, CDCl<sub>3</sub>**

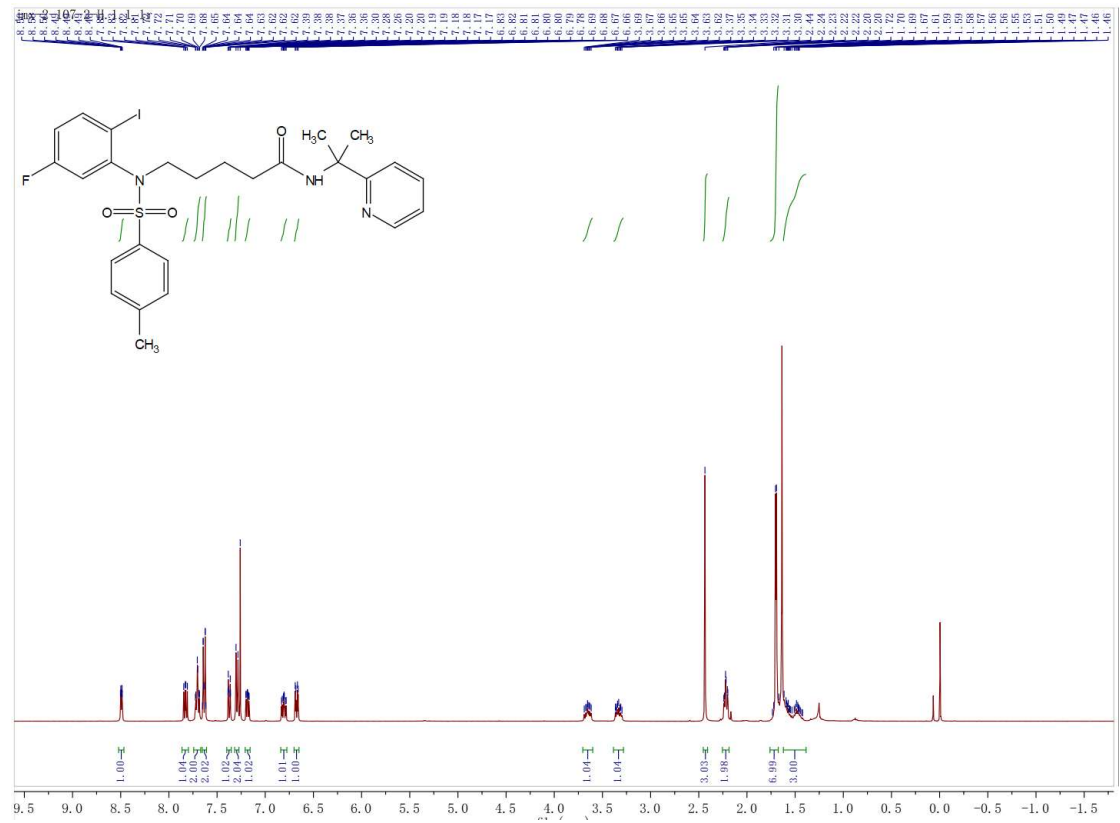

**1k, <sup>13</sup>C NMR, 101 MHz, CDCl<sub>3</sub>**

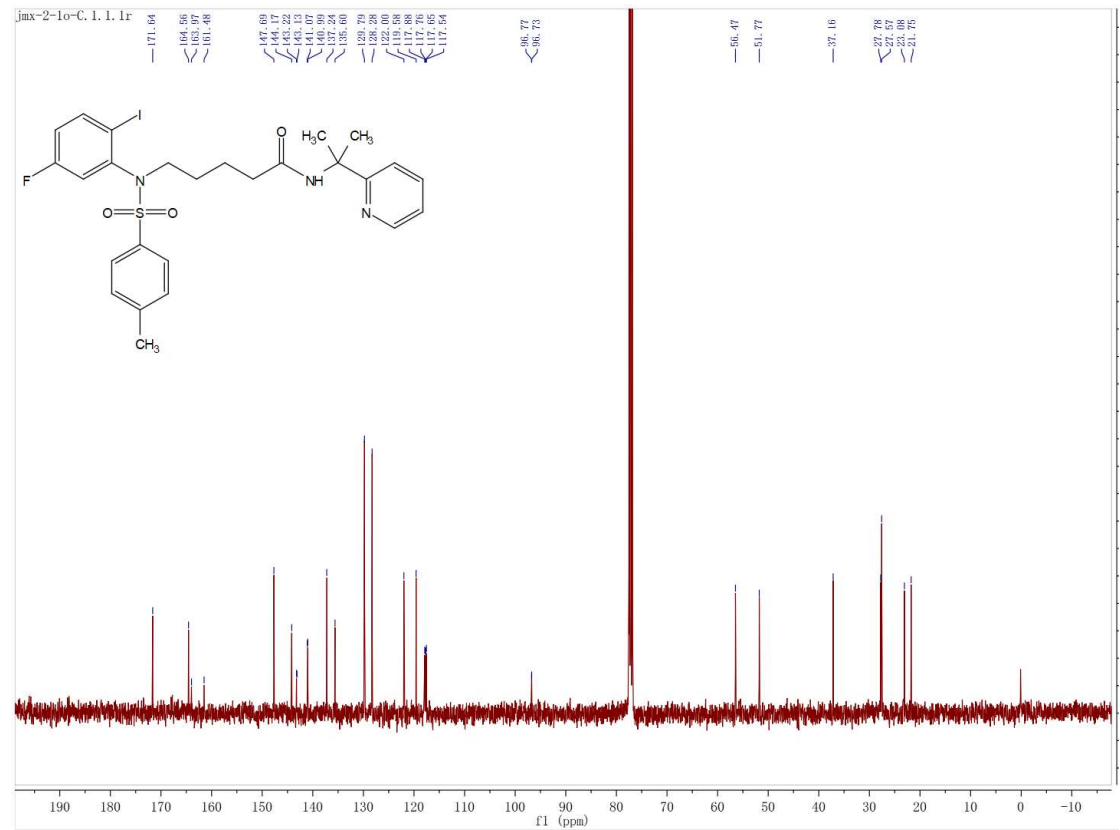

**1k,  $^{19}\text{F}$  NMR, 376 MHz,  $\text{CDCl}_3$**

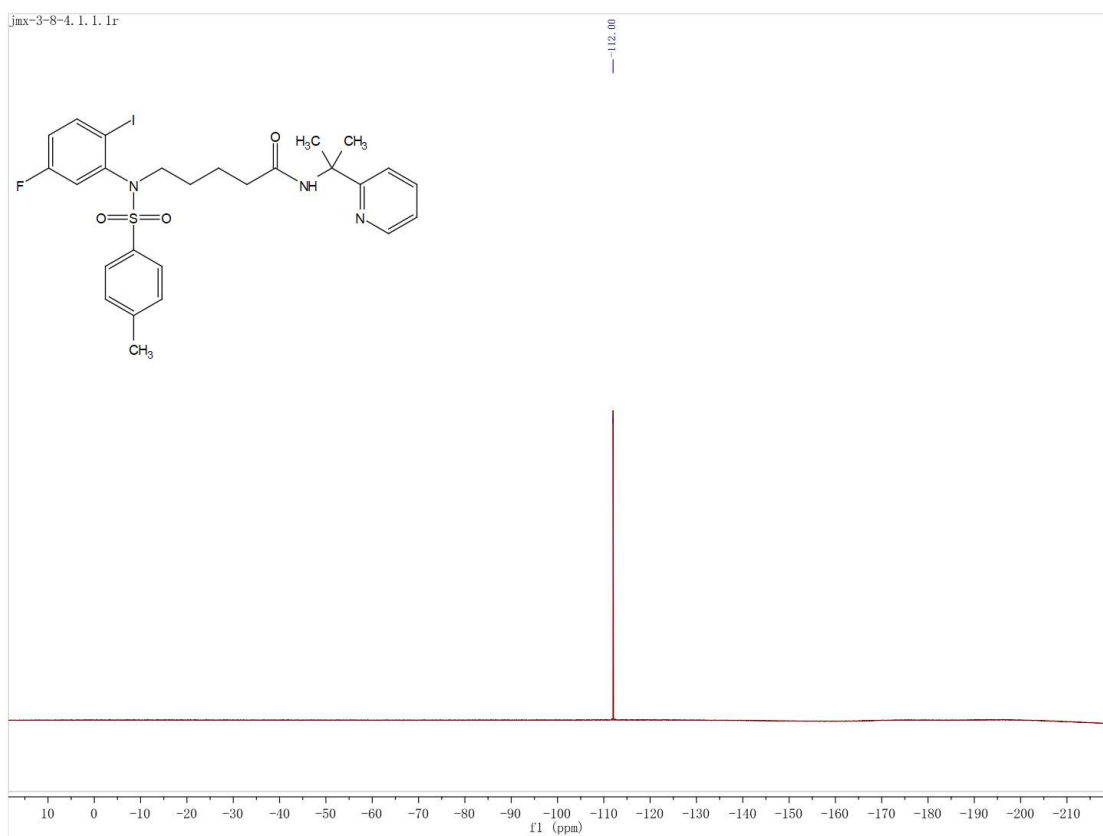

**11, <sup>1</sup>H NMR, 400 MHz, CDCl<sub>3</sub>**

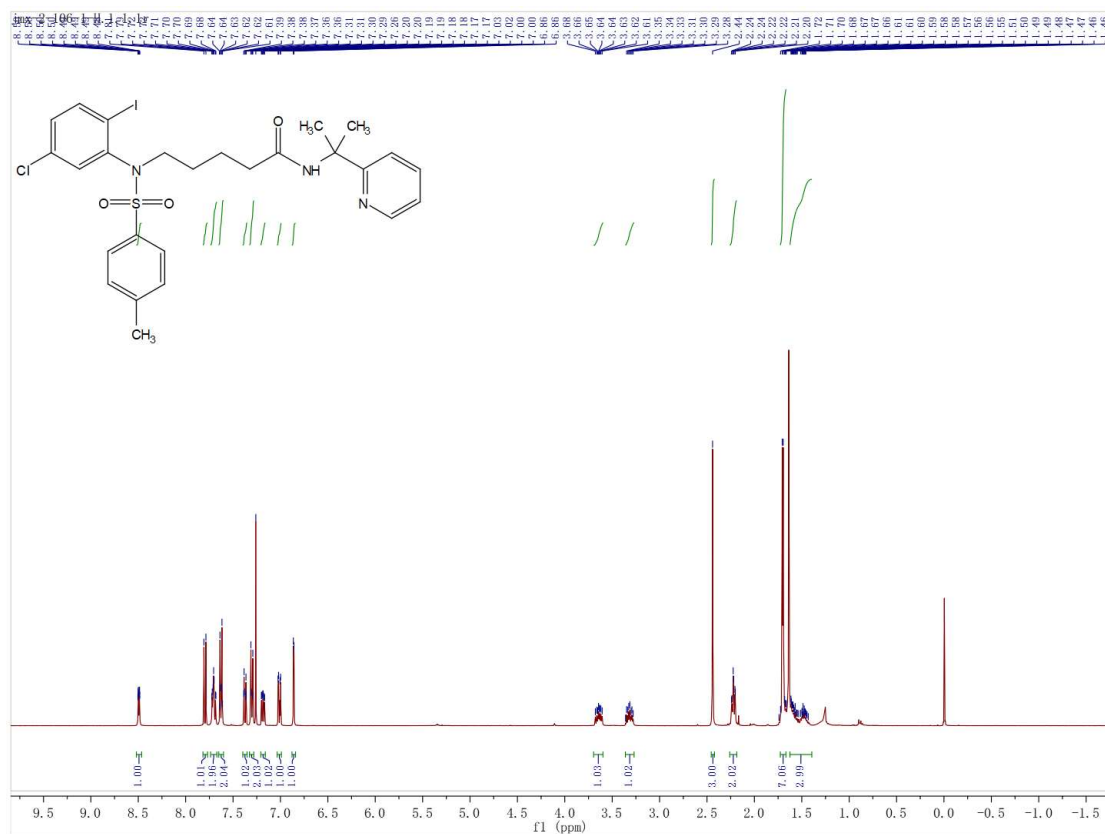

**11, <sup>13</sup>C NMR, 101 MHz, CDCl<sub>3</sub>**

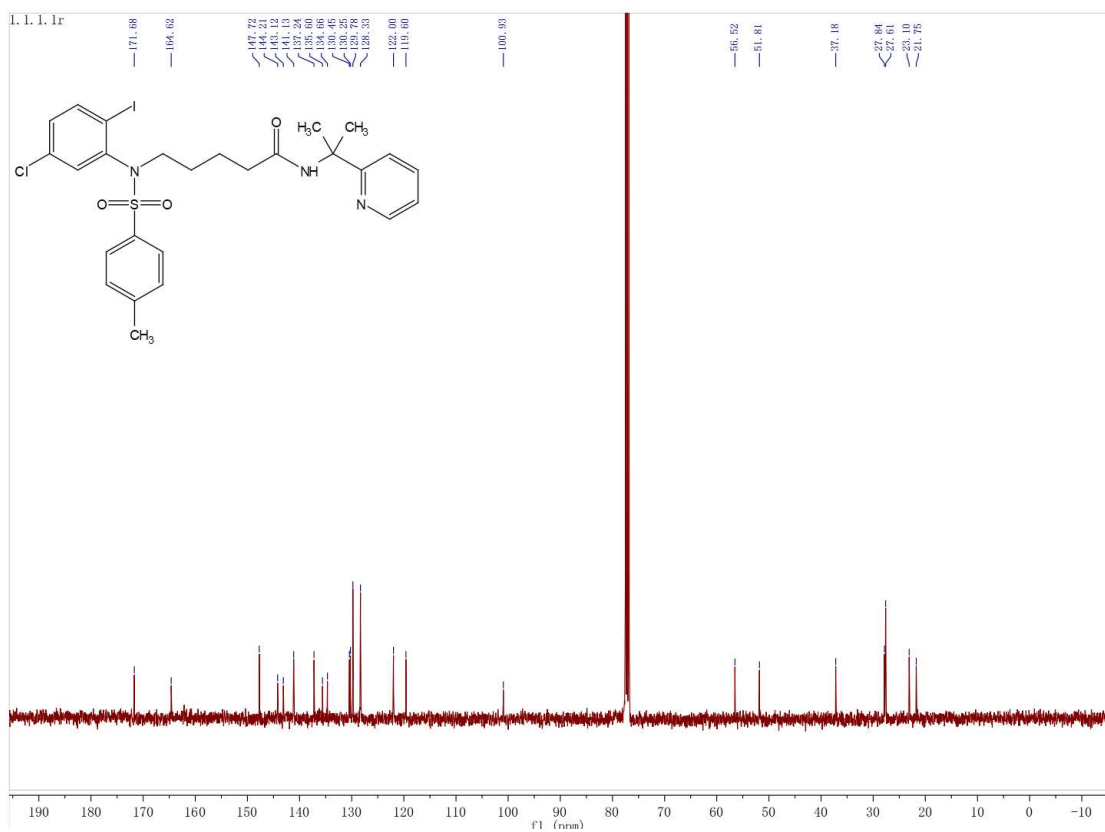



**1m, <sup>1</sup>H NMR, 400 MHz, CDCl<sub>3</sub>**

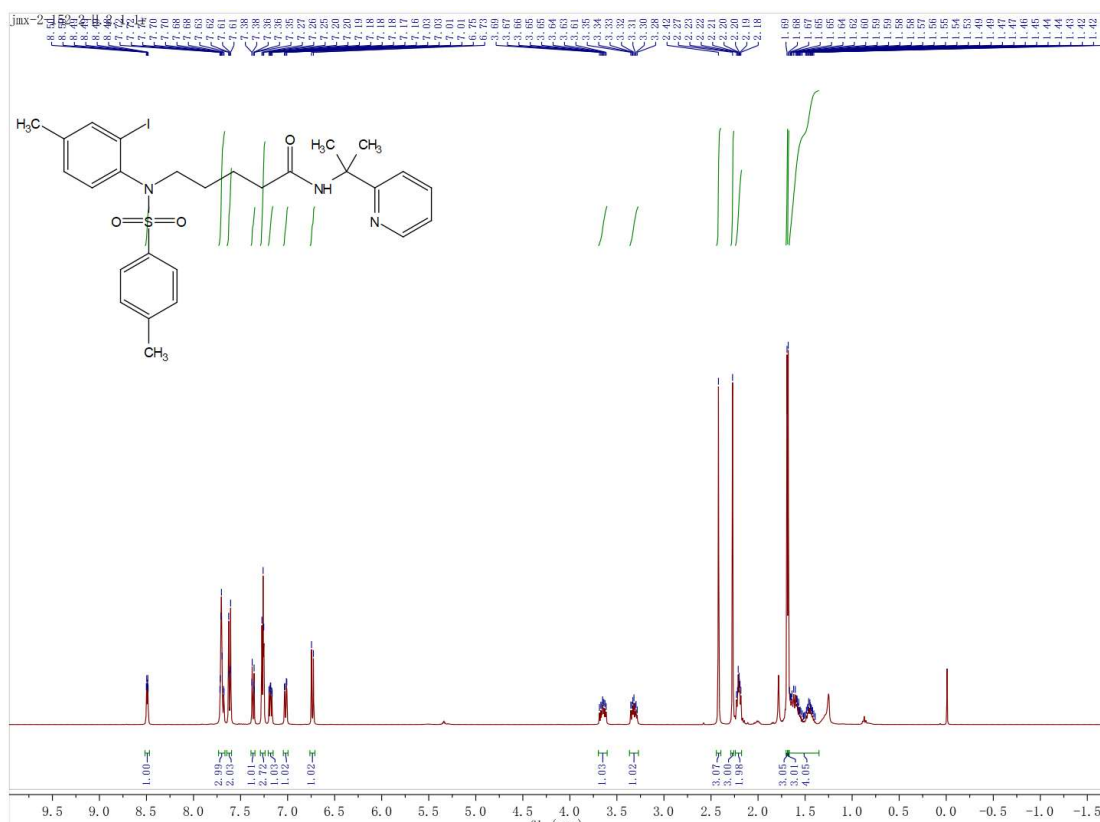

**1m, <sup>13</sup>C NMR, 101 MHz, CDCl<sub>3</sub>**

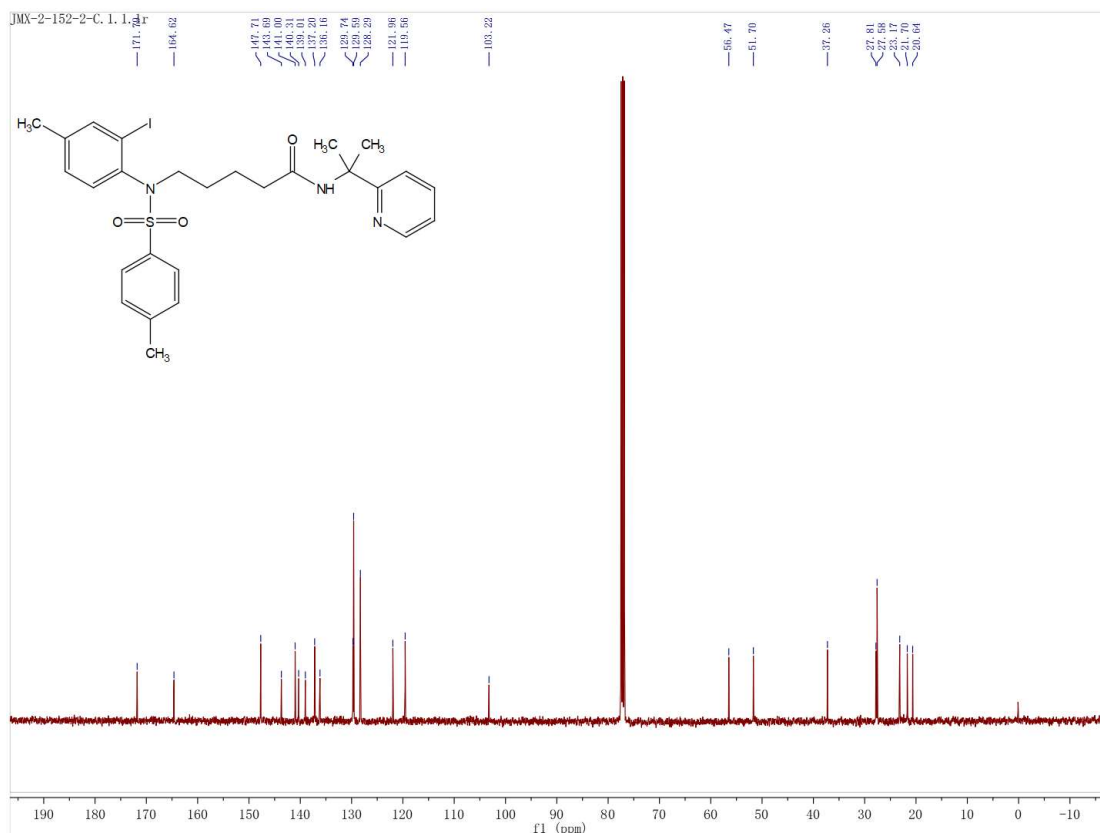

1n, <sup>1</sup>H NMR, 400 MHz, CDCl<sub>3</sub>

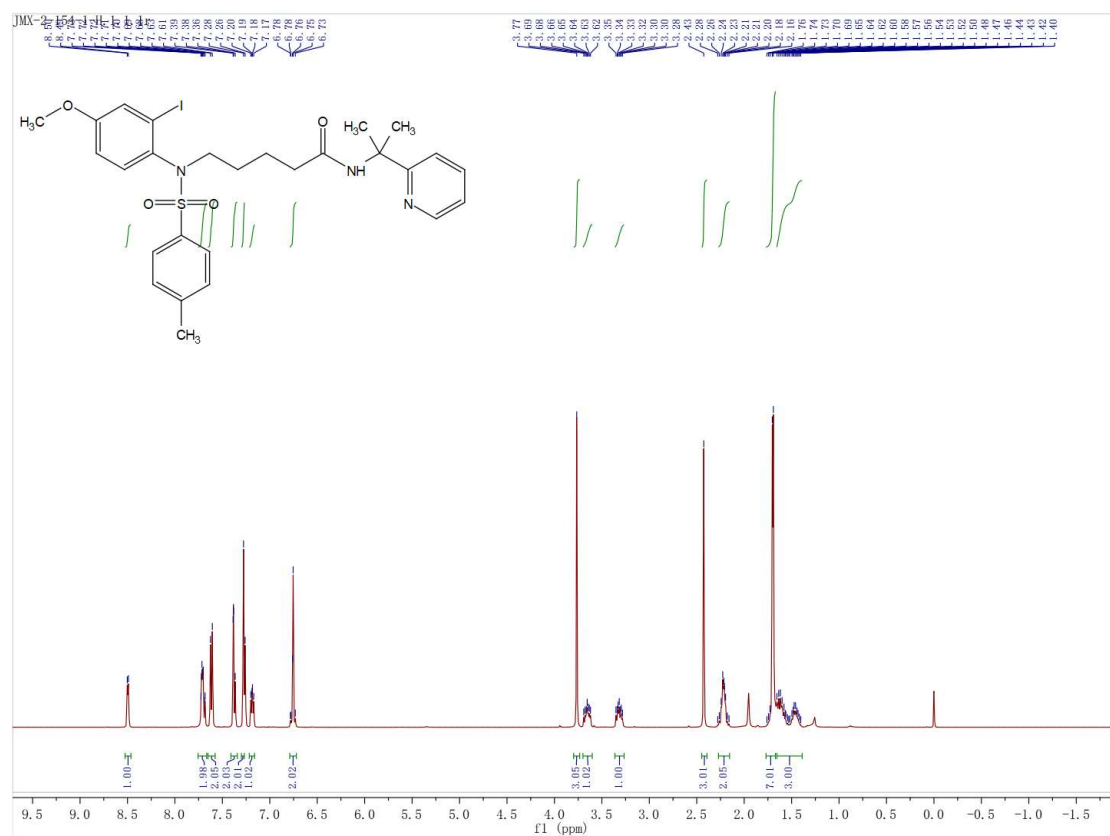

1n, <sup>13</sup>C NMR, 101 MHz, CDCl<sub>3</sub>

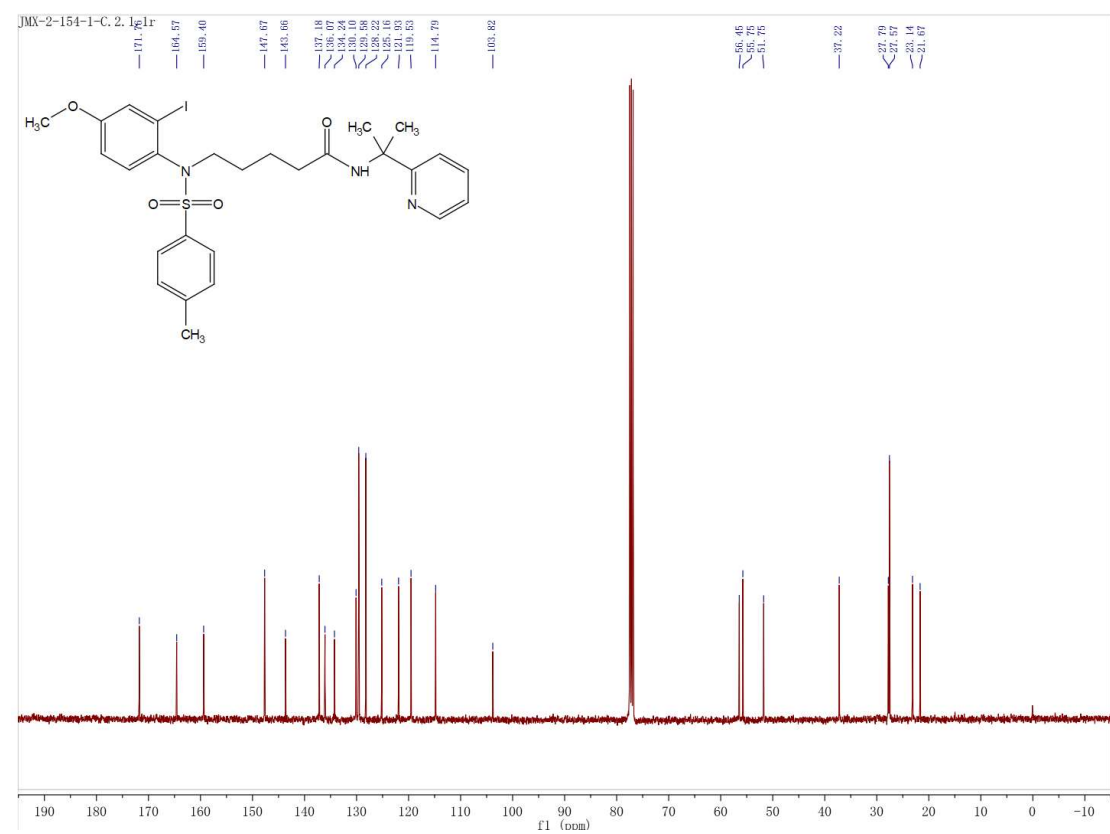



**10,  $^{19}\text{F}$  NMR, 376 MHz,  $\text{CDCl}_3$**

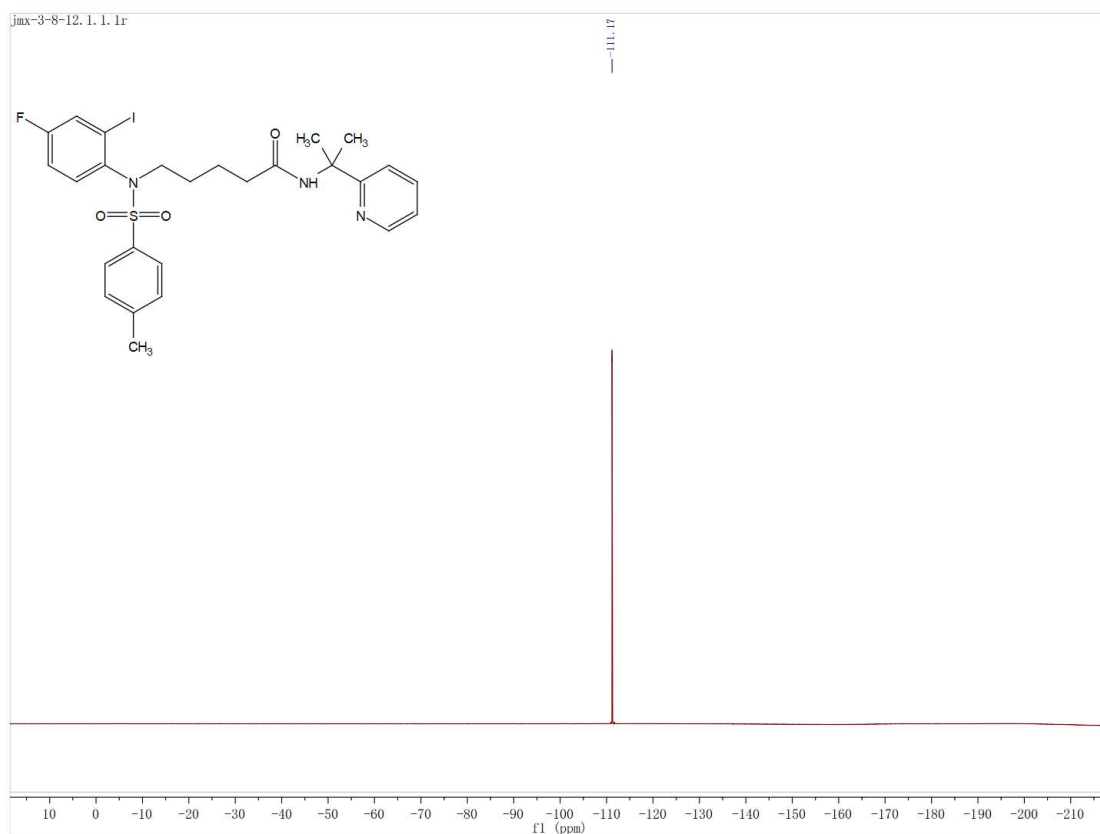

1p, <sup>1</sup>H NMR, 400 MHz, CDCl<sub>3</sub>

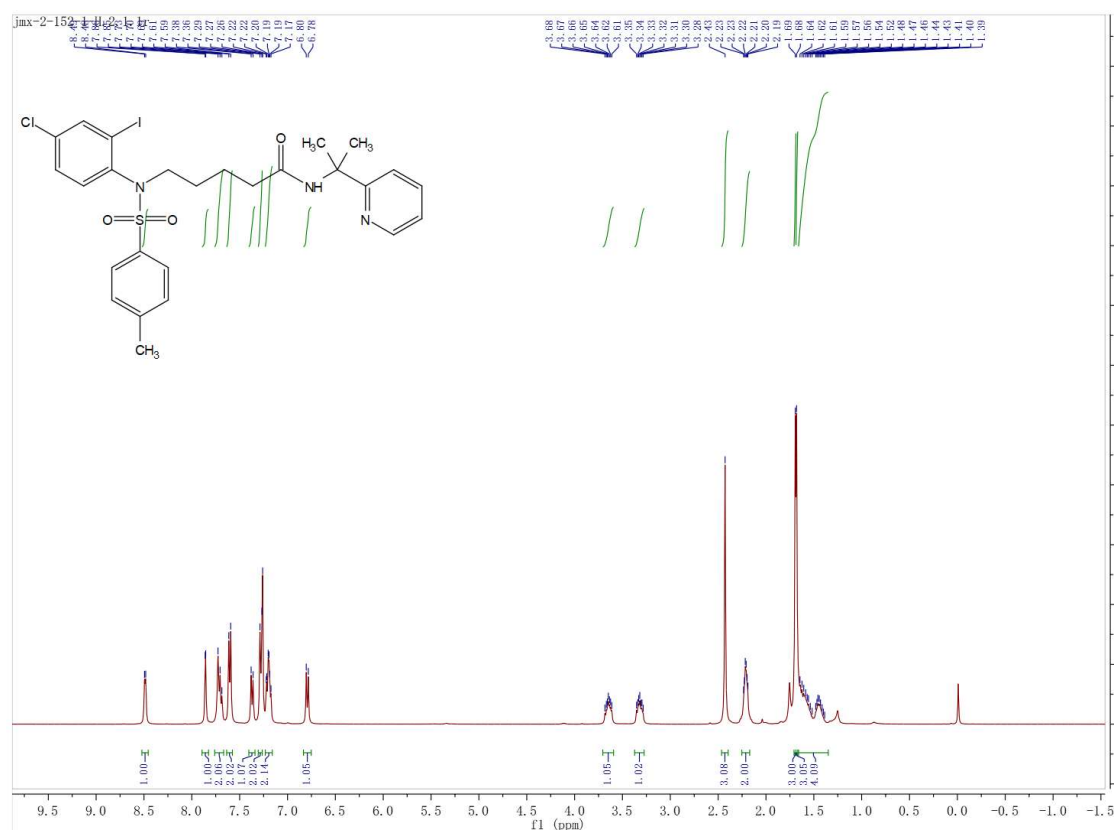

1p, <sup>13</sup>C NMR, 101 MHz, CDCl<sub>3</sub>

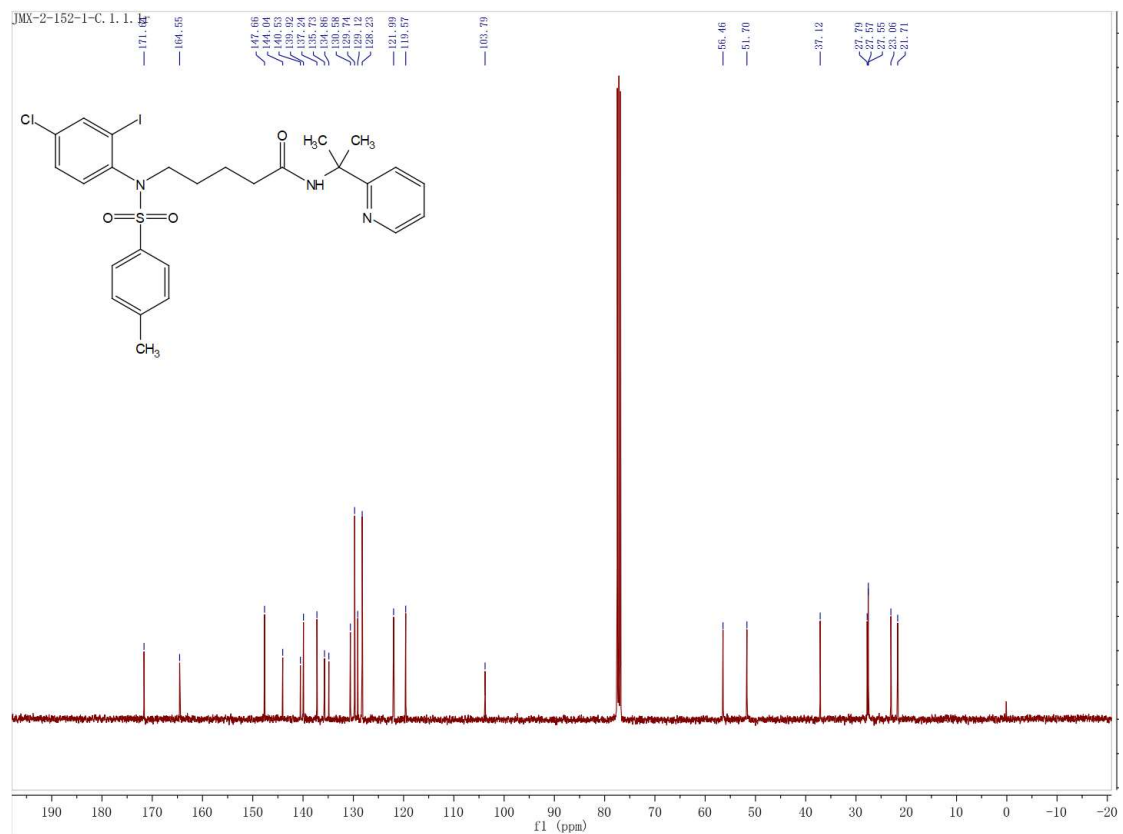

**1q, <sup>1</sup>H NMR, 400 MHz, CDCl<sub>3</sub>**

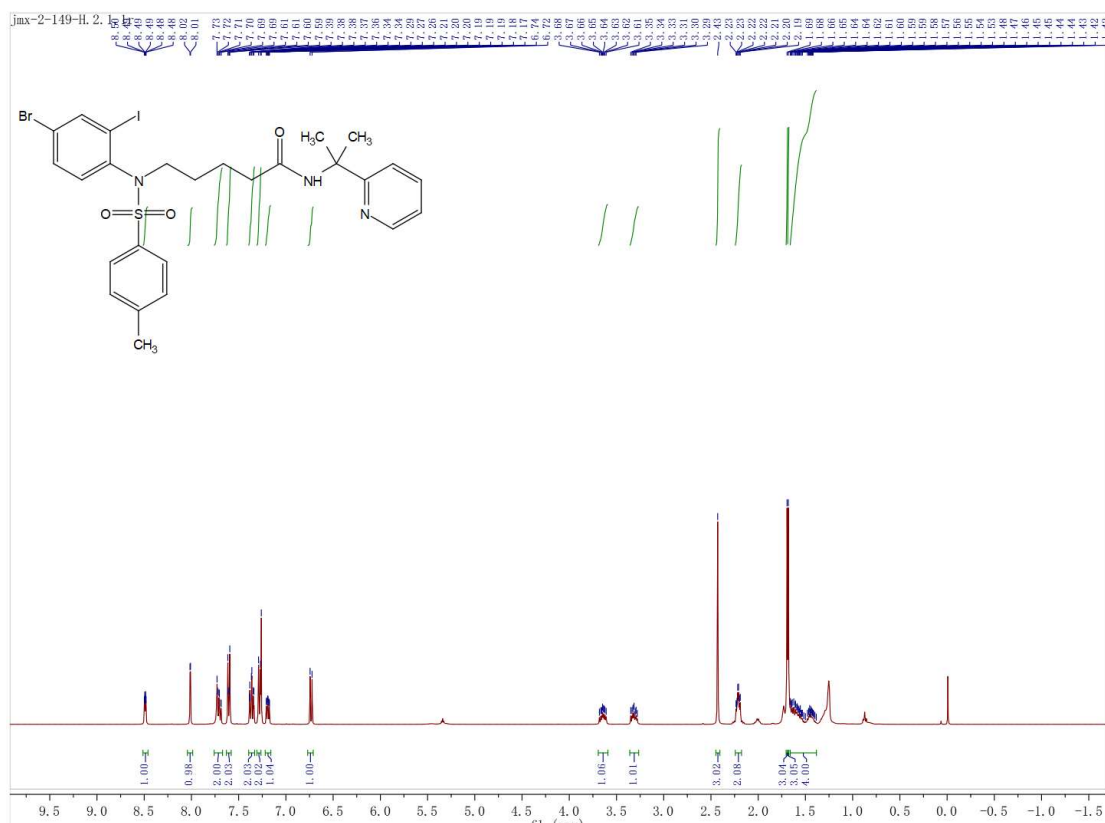

**1q, <sup>13</sup>C NMR, 101 MHz, CDCl<sub>3</sub>**

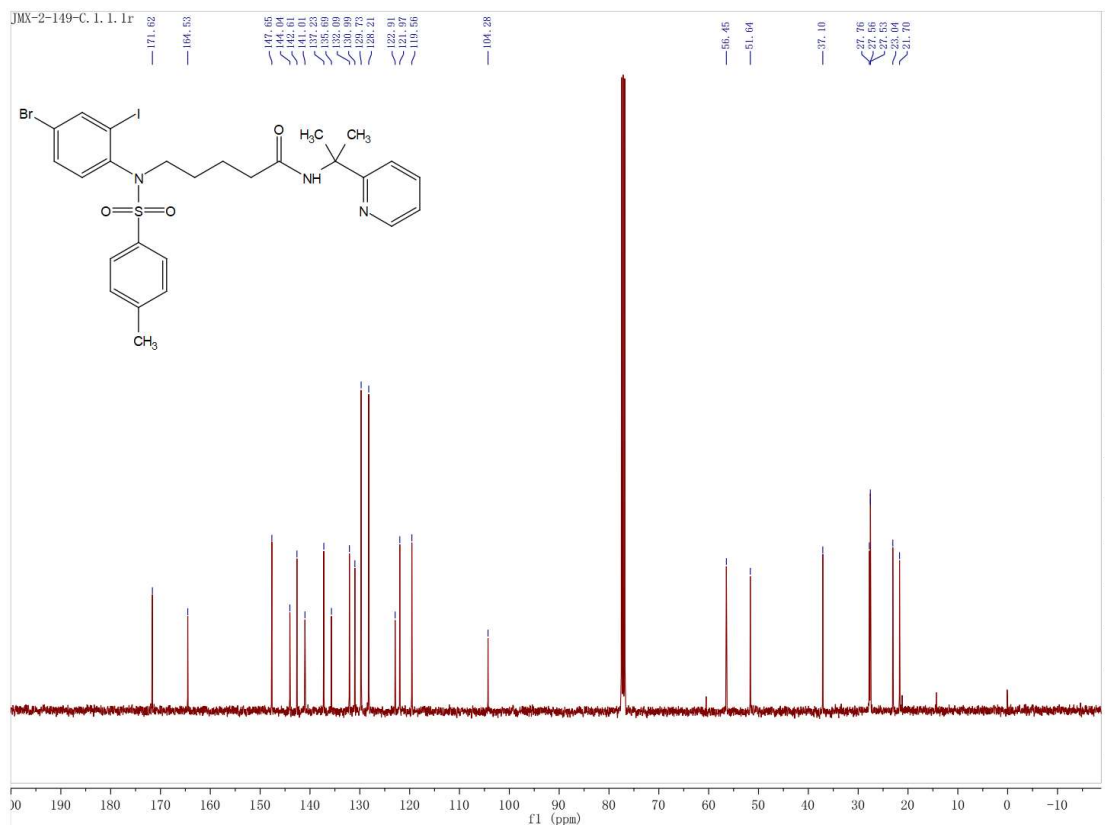

**1r,  $^1\text{H}$  NMR, 400 MHz,  $\text{CDCl}_3$**

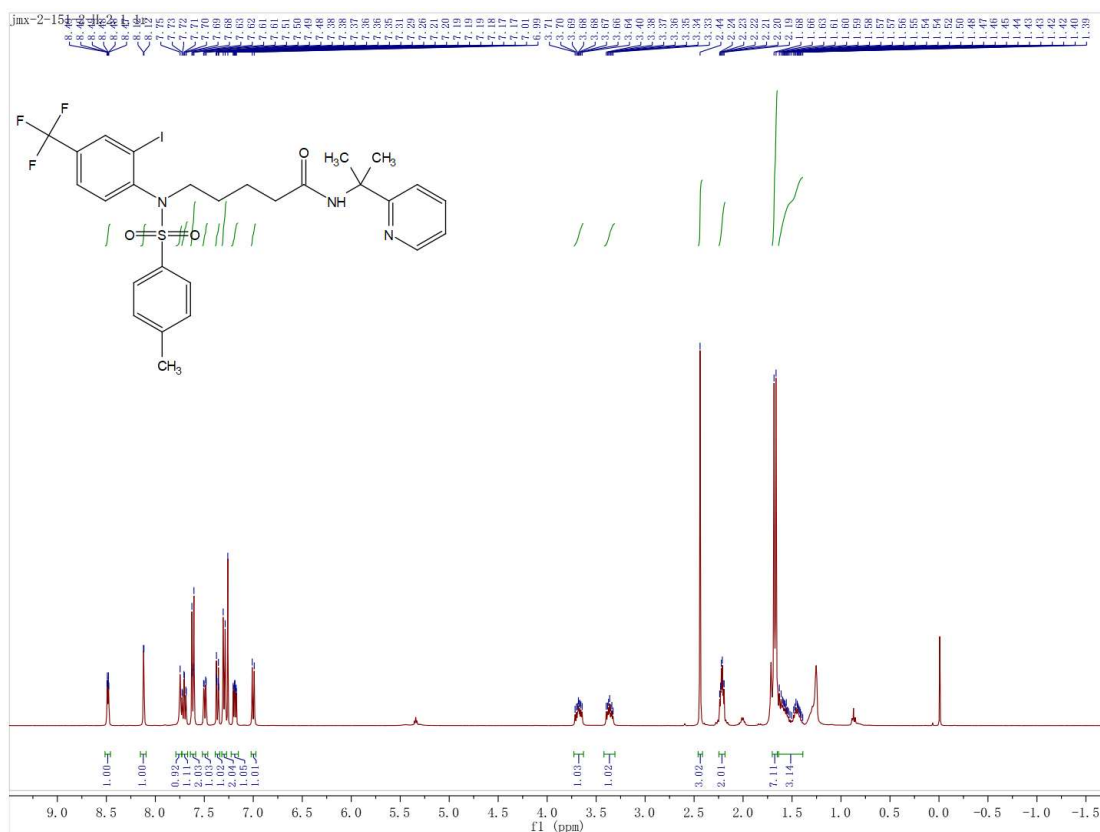

**1r,  $^{13}\text{C}$  NMR, 101 MHz,  $\text{CDCl}_3$**

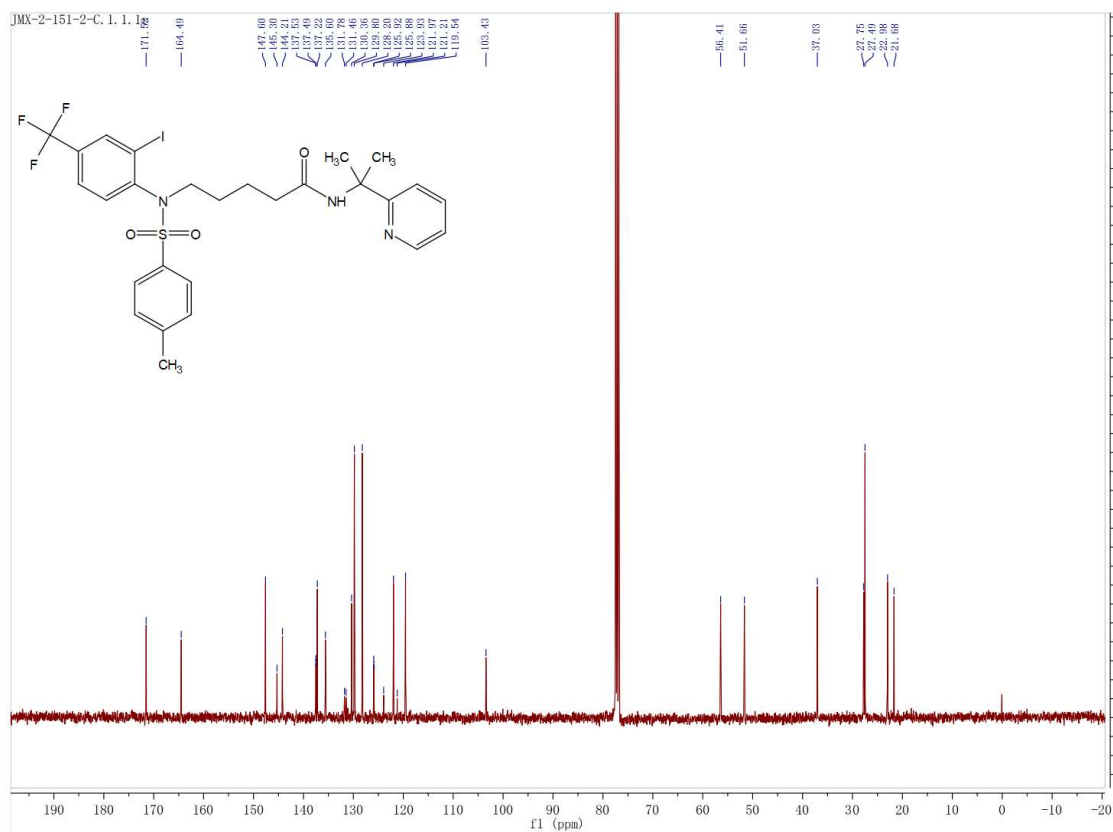

**1r,  $^{19}\text{F}$  NMR, 376 MHz,  $\text{CDCl}_3$**

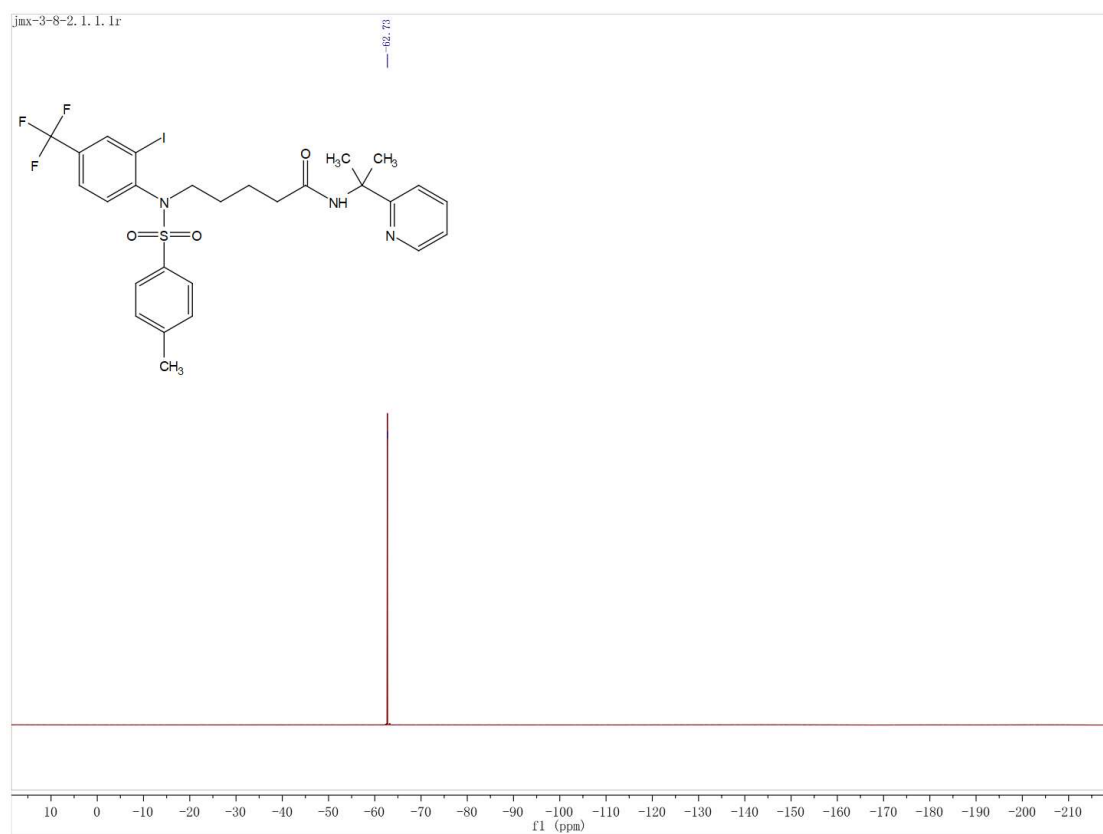



**1s, <sup>1</sup>H NMR, 400 MHz, CDCl<sub>3</sub>**

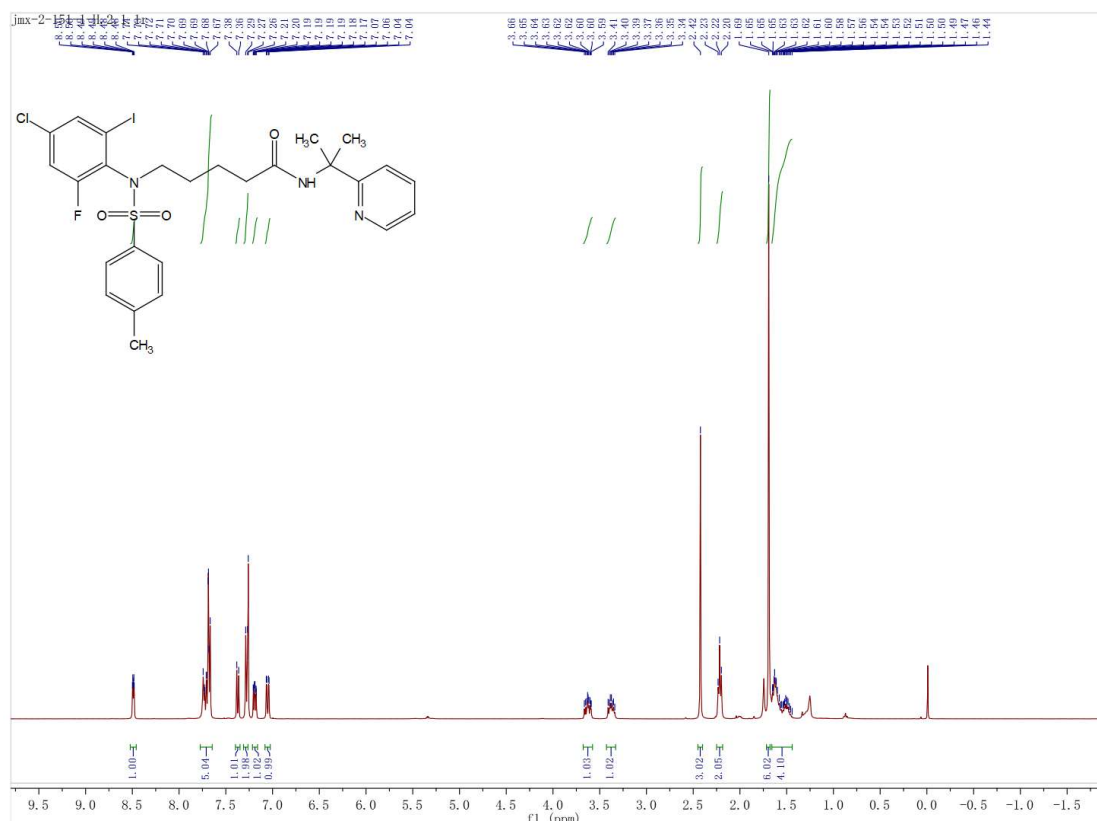

**1s, <sup>13</sup>C NMR, 101 MHz, CDCl<sub>3</sub>**

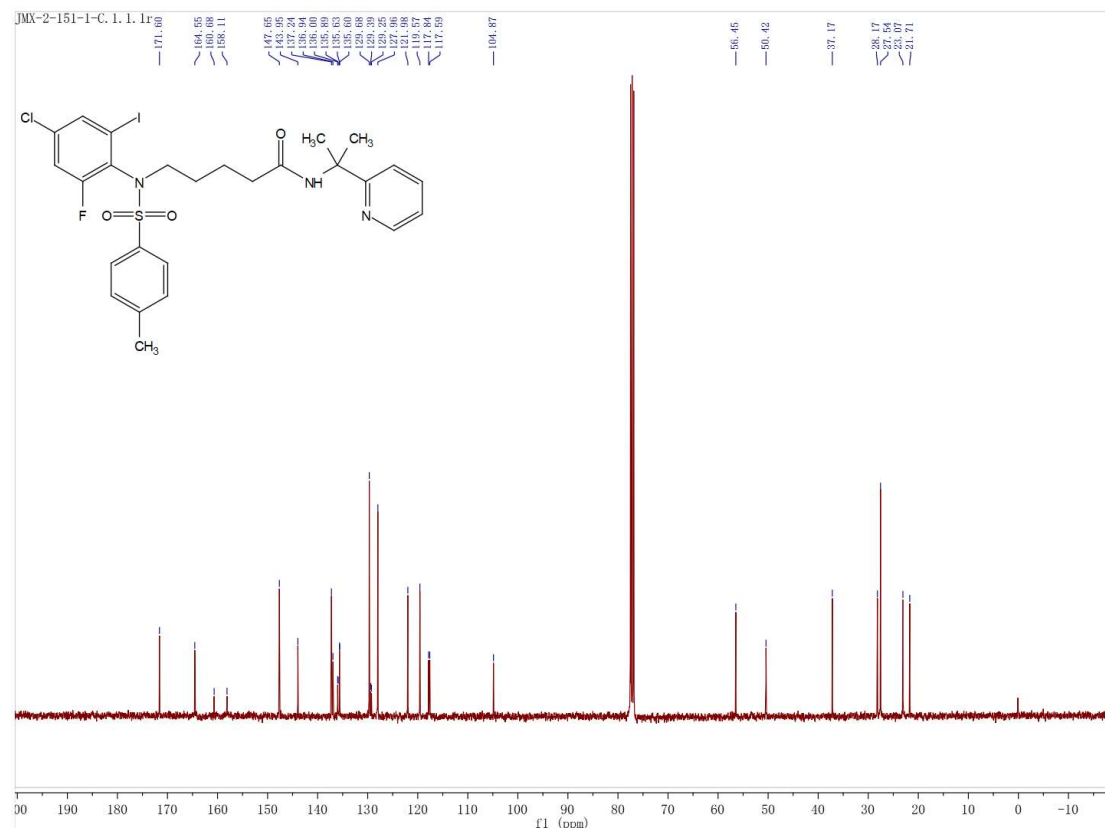

**1s,  $^{19}\text{F}$  NMR, 376 MHz,  $\text{CDCl}_3$**

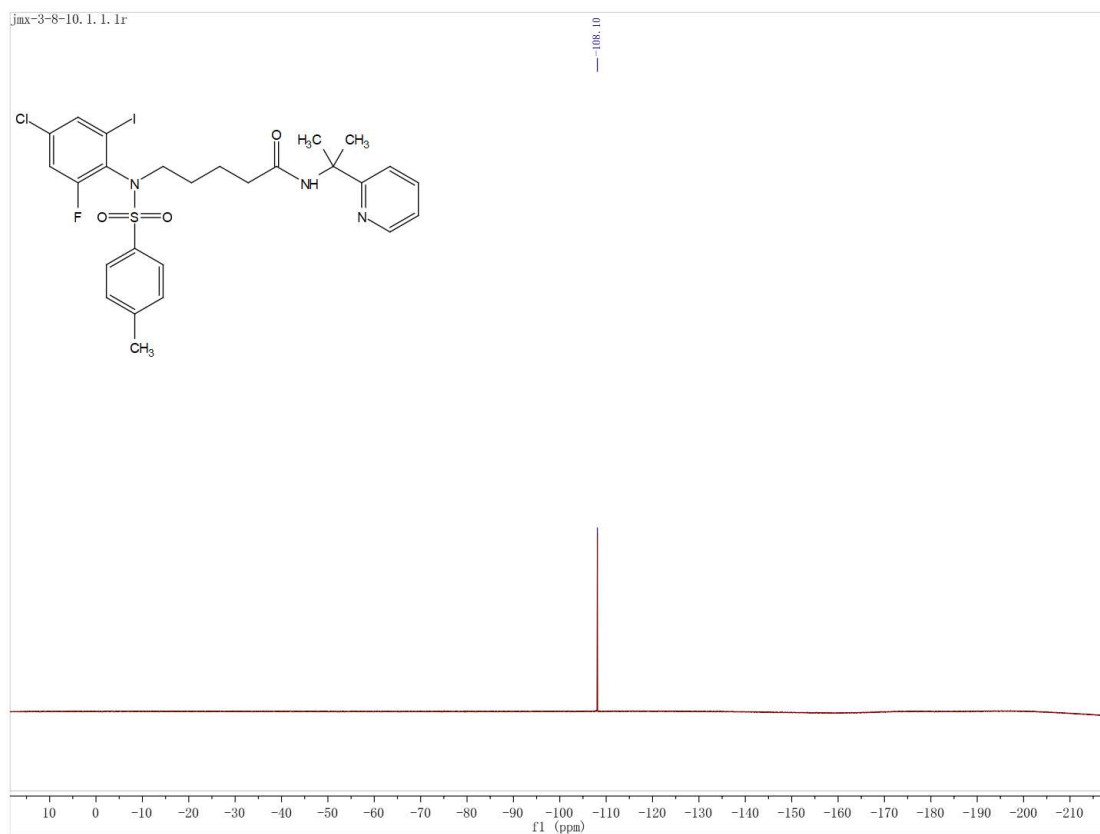

**1t,  $^1\text{H}$  NMR, 400 MHz,  $\text{CDCl}_3$**

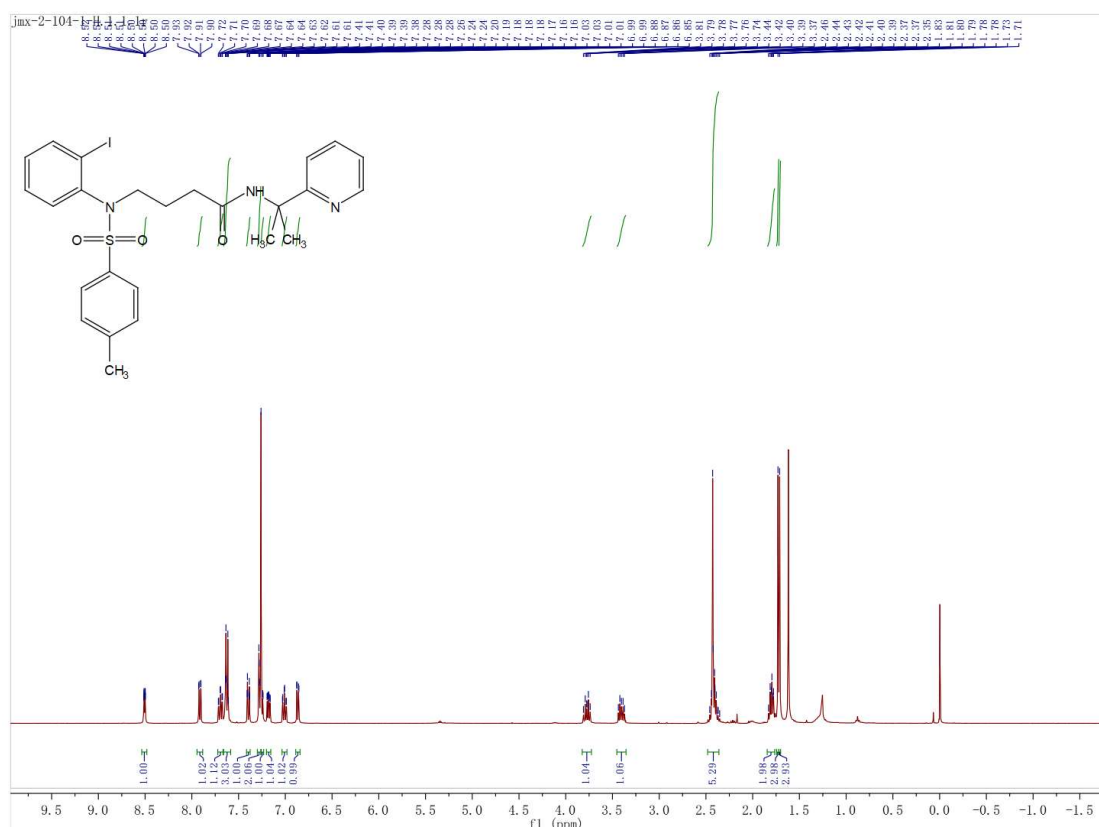

**1t,  $^{13}\text{C}$  NMR, 101 MHz,  $\text{CDCl}_3$**

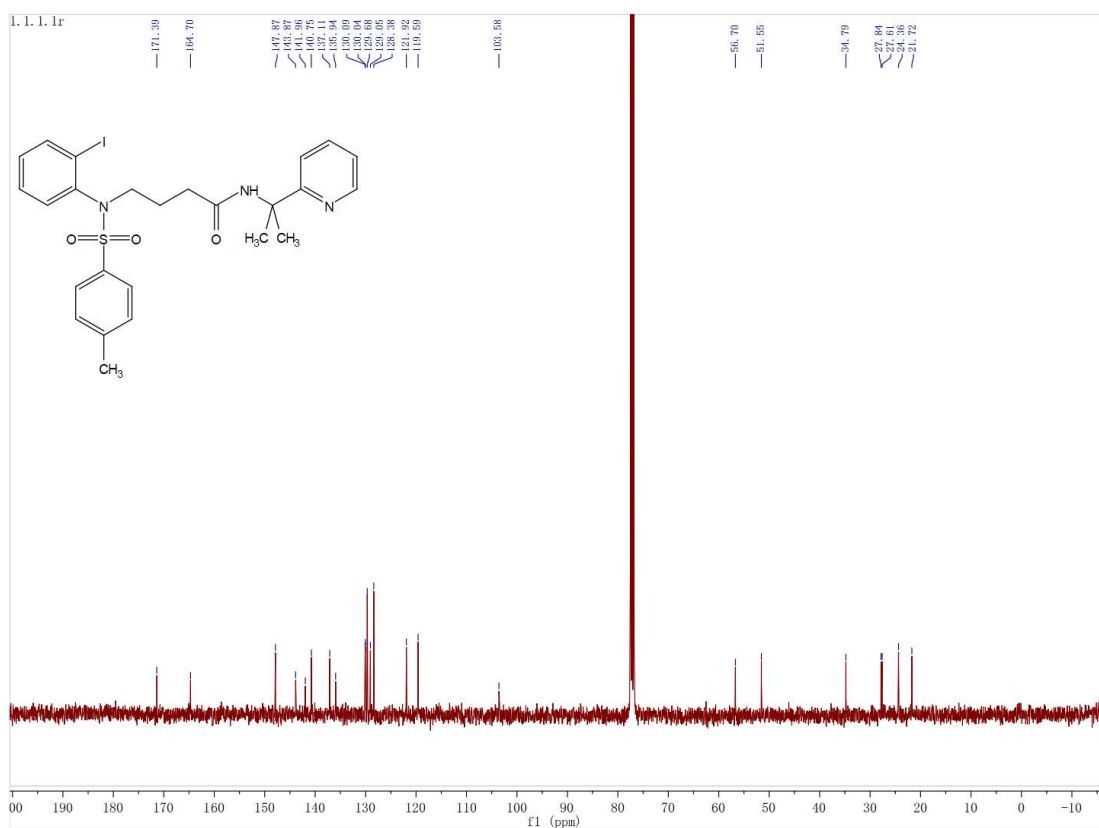

**1u, <sup>1</sup>H NMR, 400 MHz, CDCl<sub>3</sub>**

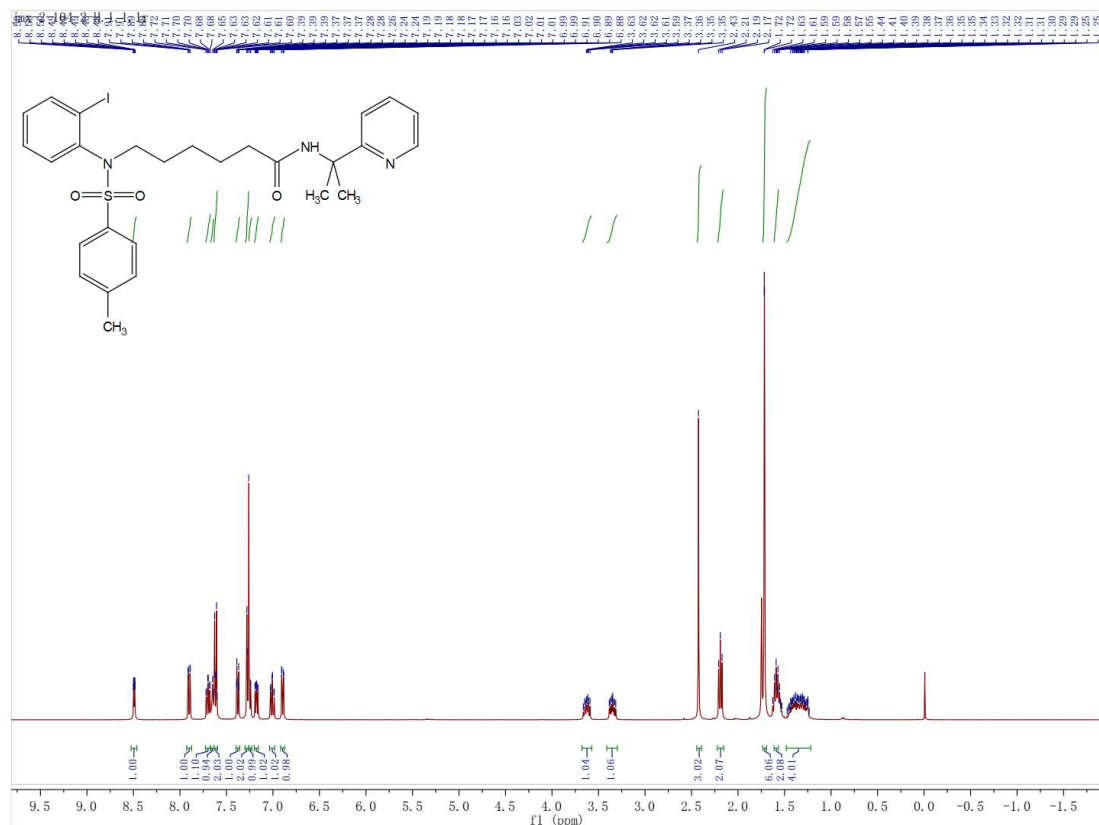

**1u, <sup>13</sup>C NMR, 101 MHz, CDCl<sub>3</sub>**

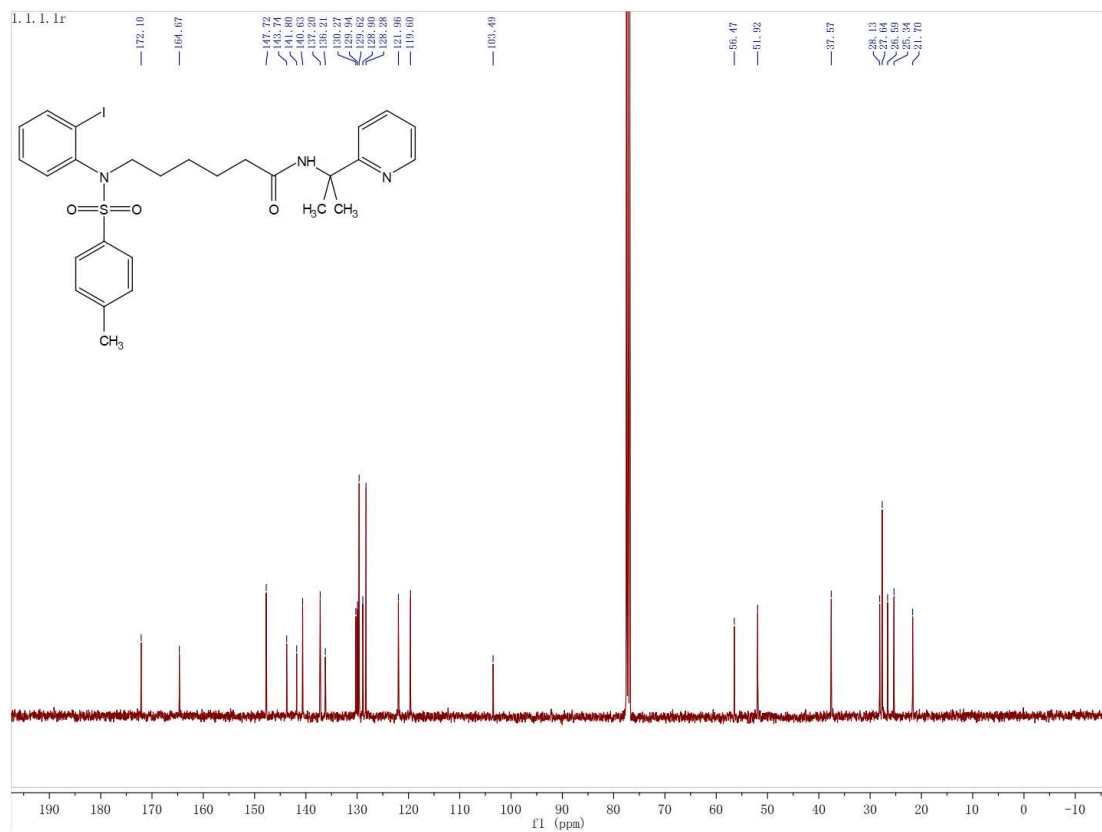

2a, <sup>1</sup>H NMR, 400 MHz, CDCl<sub>3</sub>

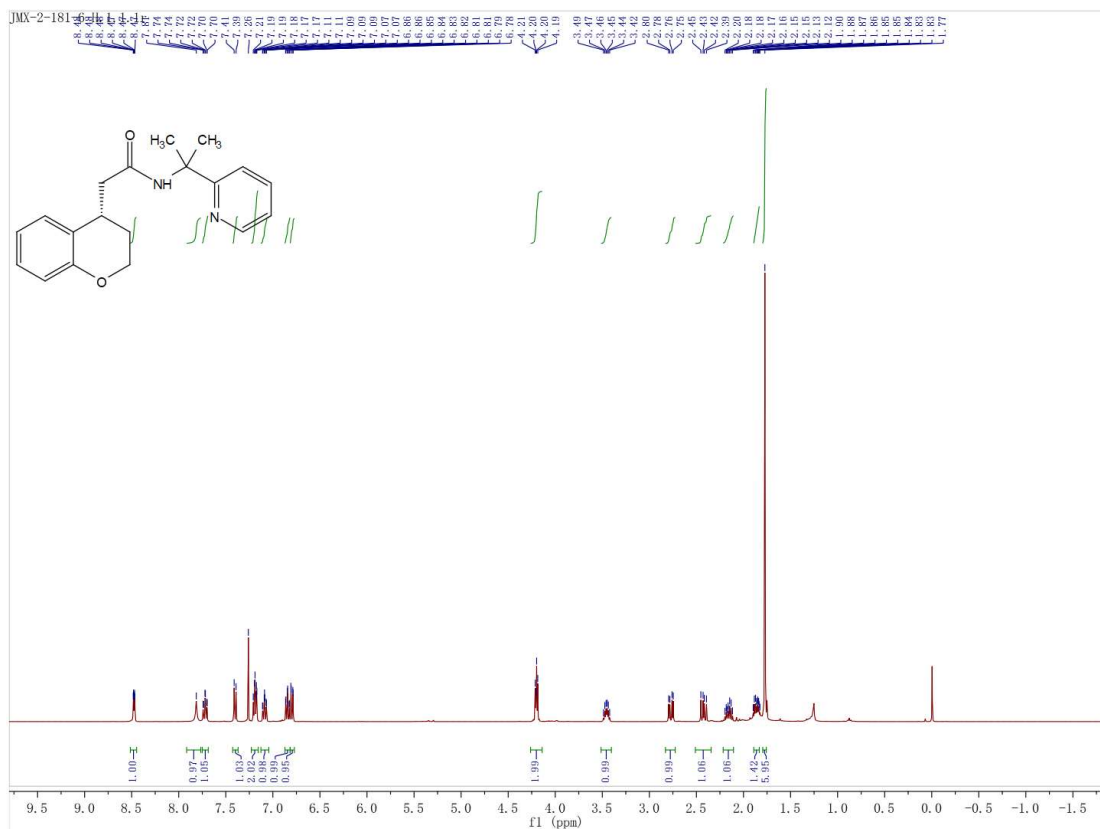

2a, <sup>13</sup>C NMR, 101 MHz, CDCl<sub>3</sub>

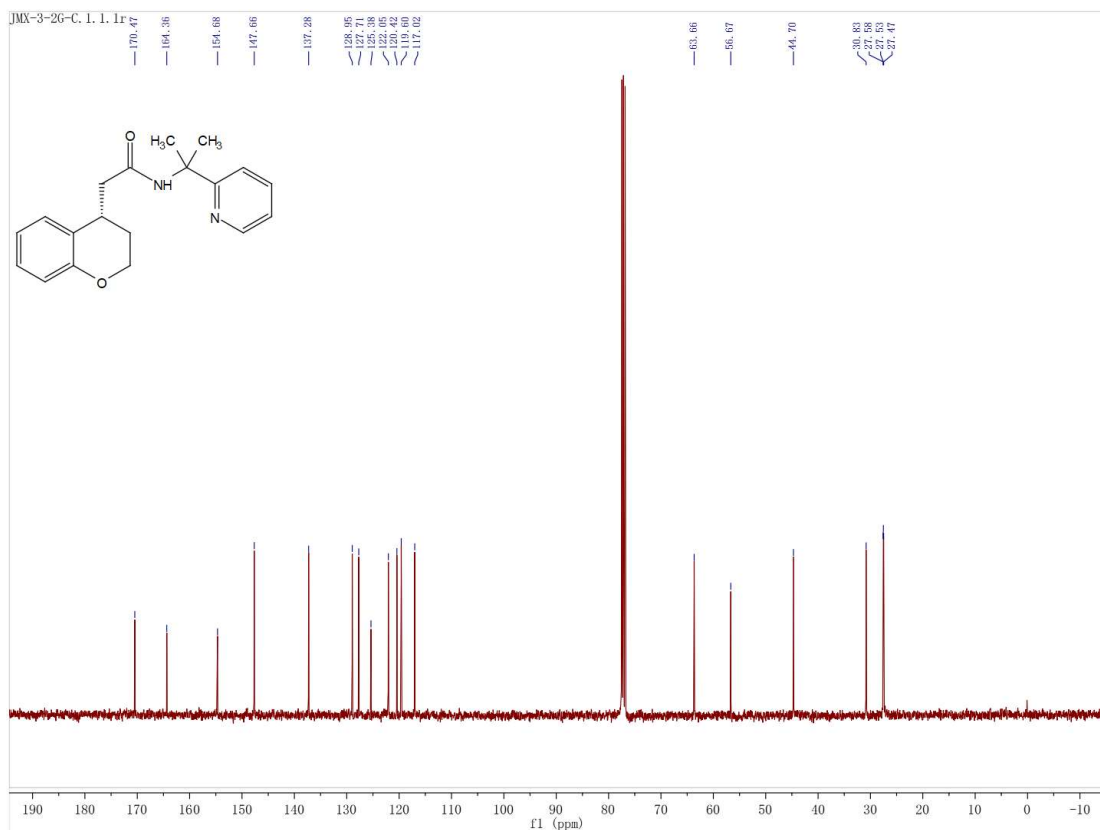

**2b, <sup>1</sup>H NMR, 400 MHz, CDCl<sub>3</sub>**

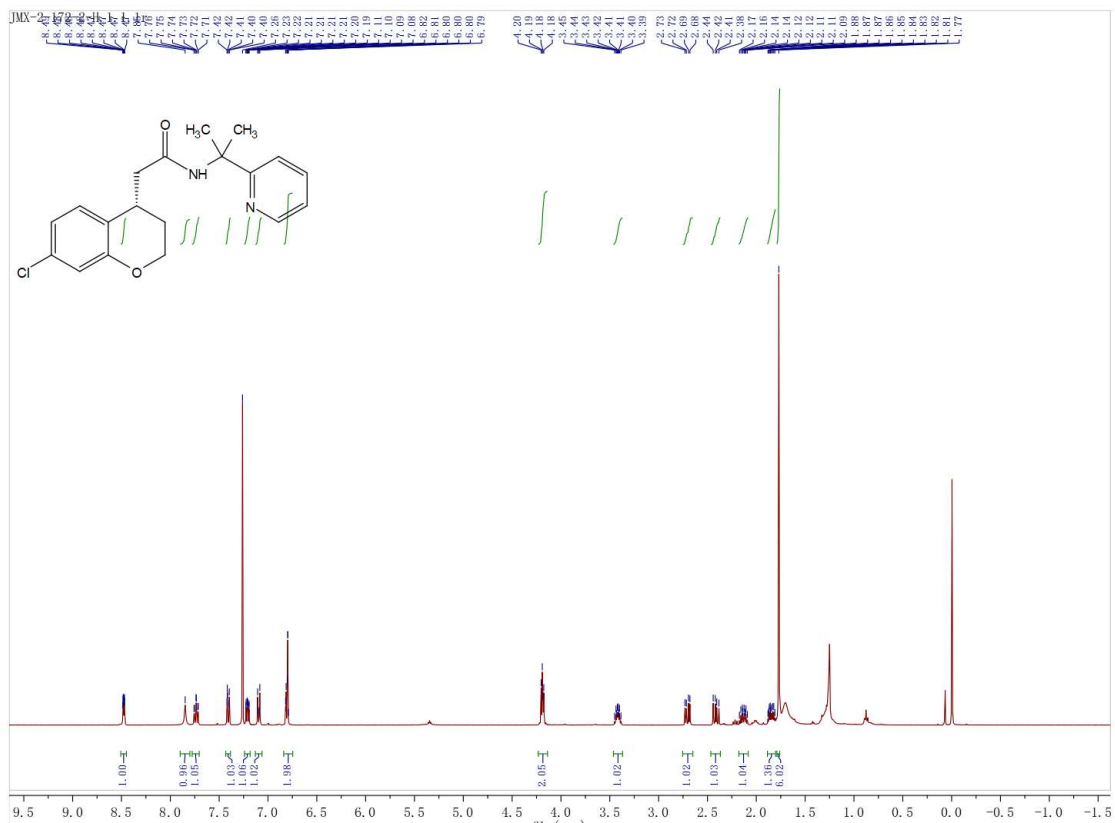

**2b, <sup>13</sup>C NMR, 101 MHz, CDCl<sub>3</sub>**

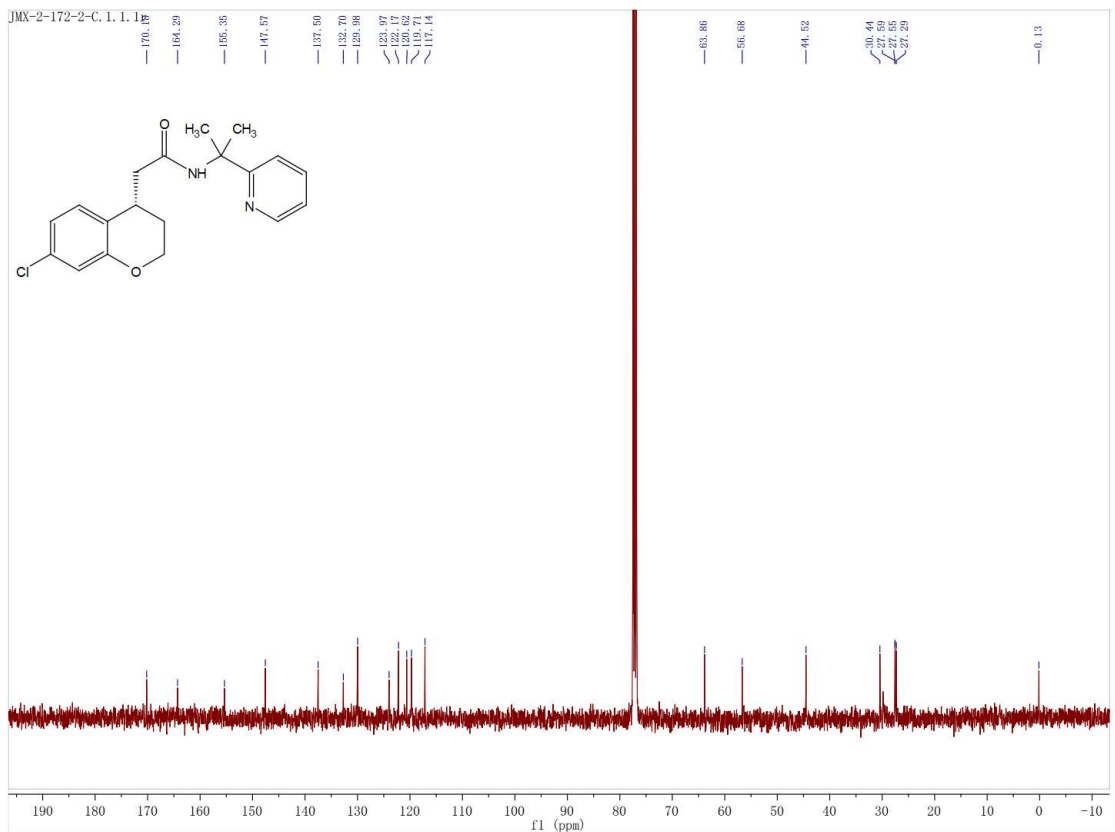

2c, <sup>1</sup>H NMR, 400 MHz, CDCl<sub>3</sub>

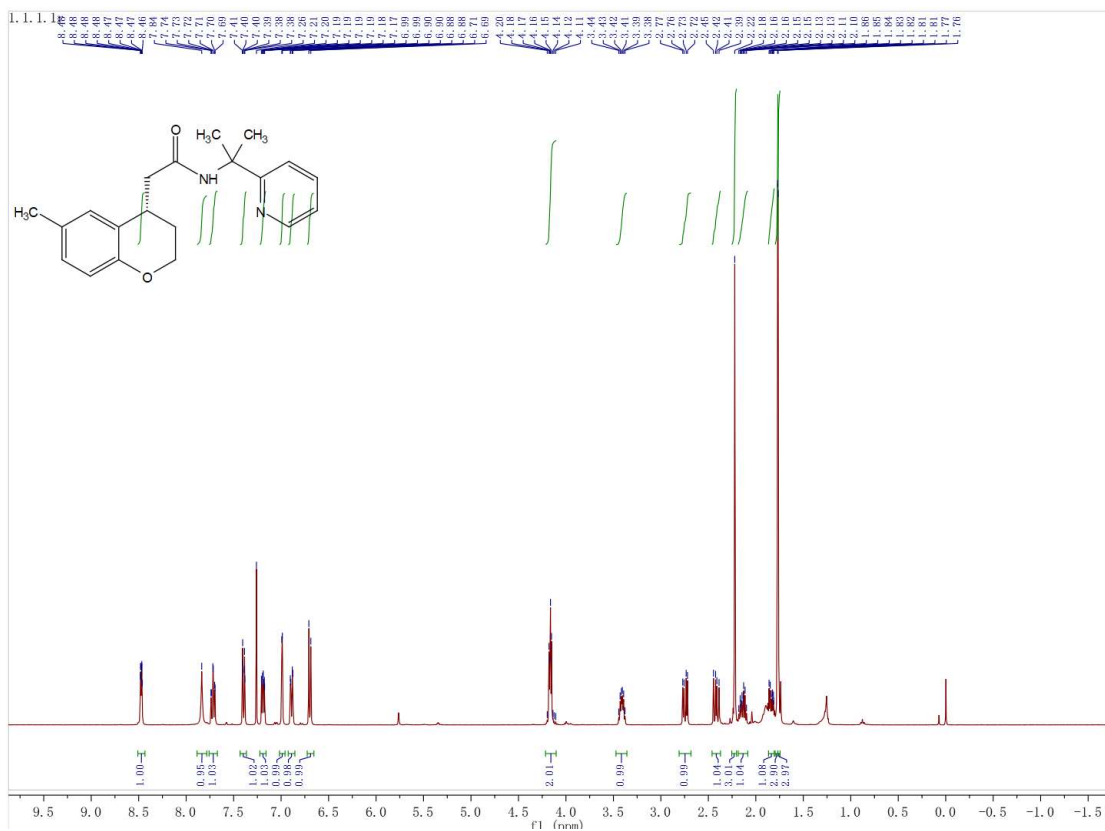

2c, <sup>13</sup>C NMR, 101 MHz, CDCl<sub>3</sub>

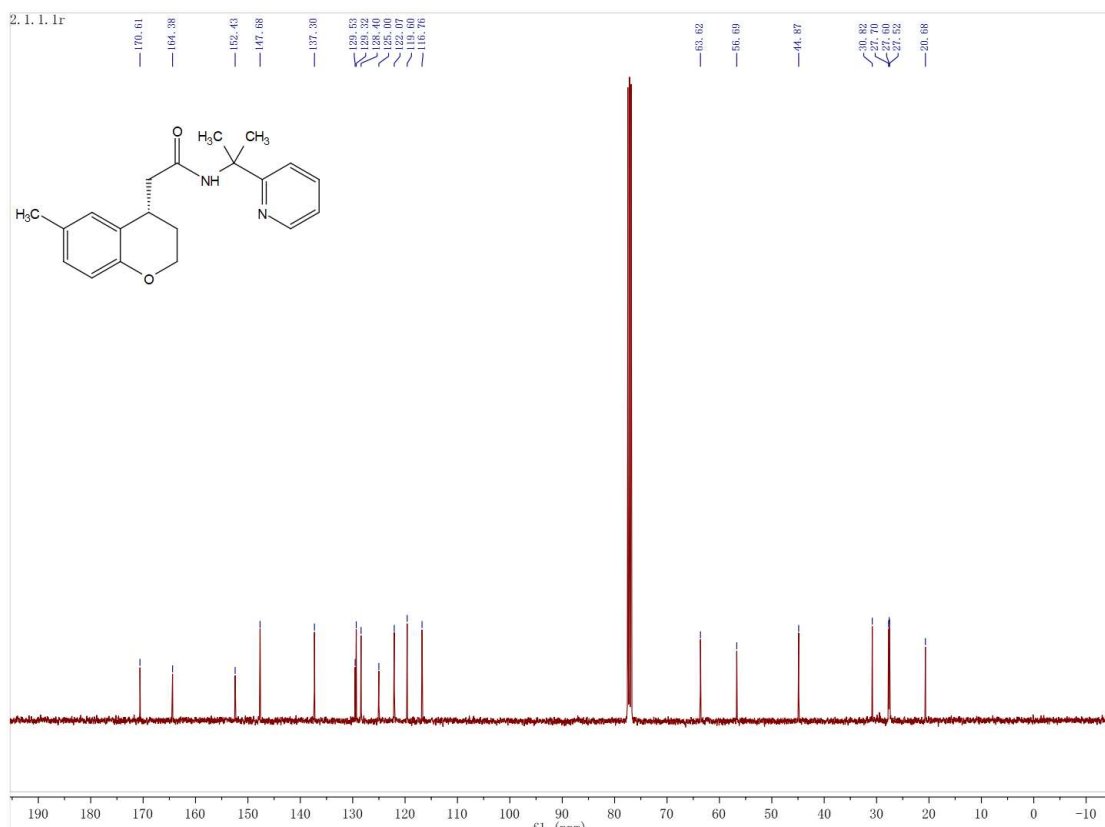





**2d,  $^{19}\text{F}$  NMR, 376 MHz,  $\text{CDCl}_3$**

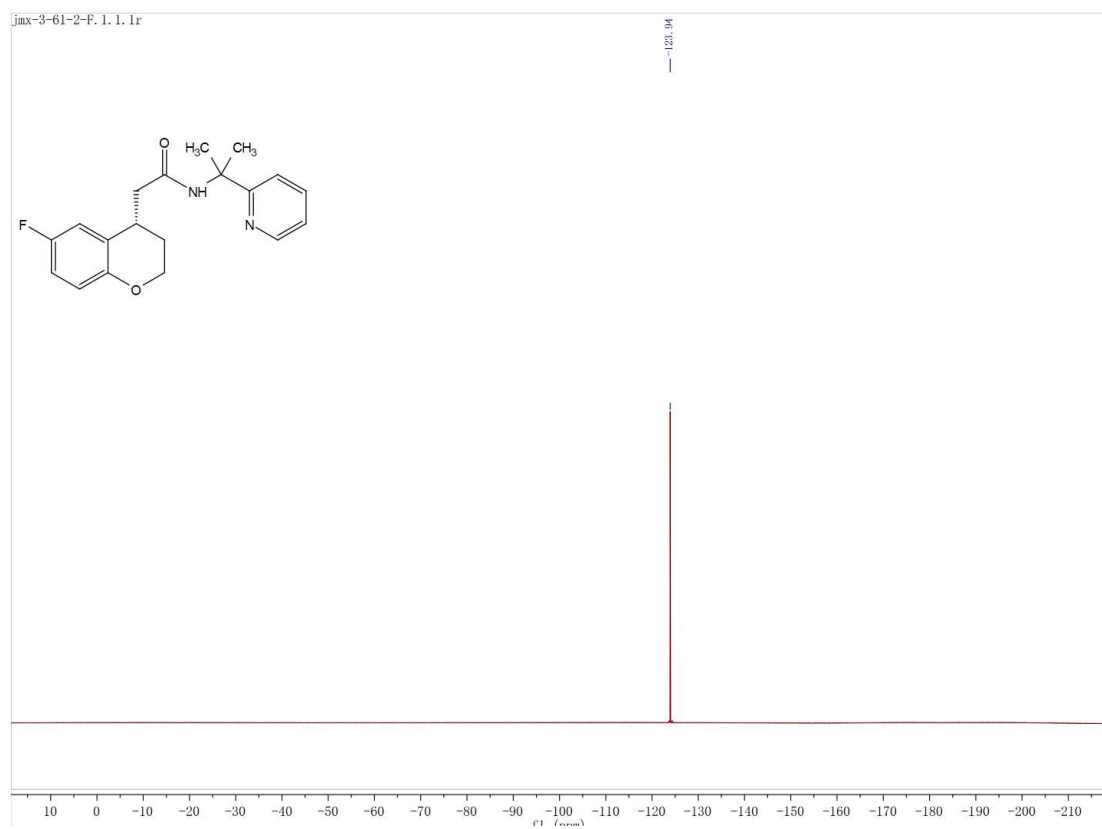

**2e, <sup>1</sup>H NMR, 400 MHz, CDCl<sub>3</sub>**

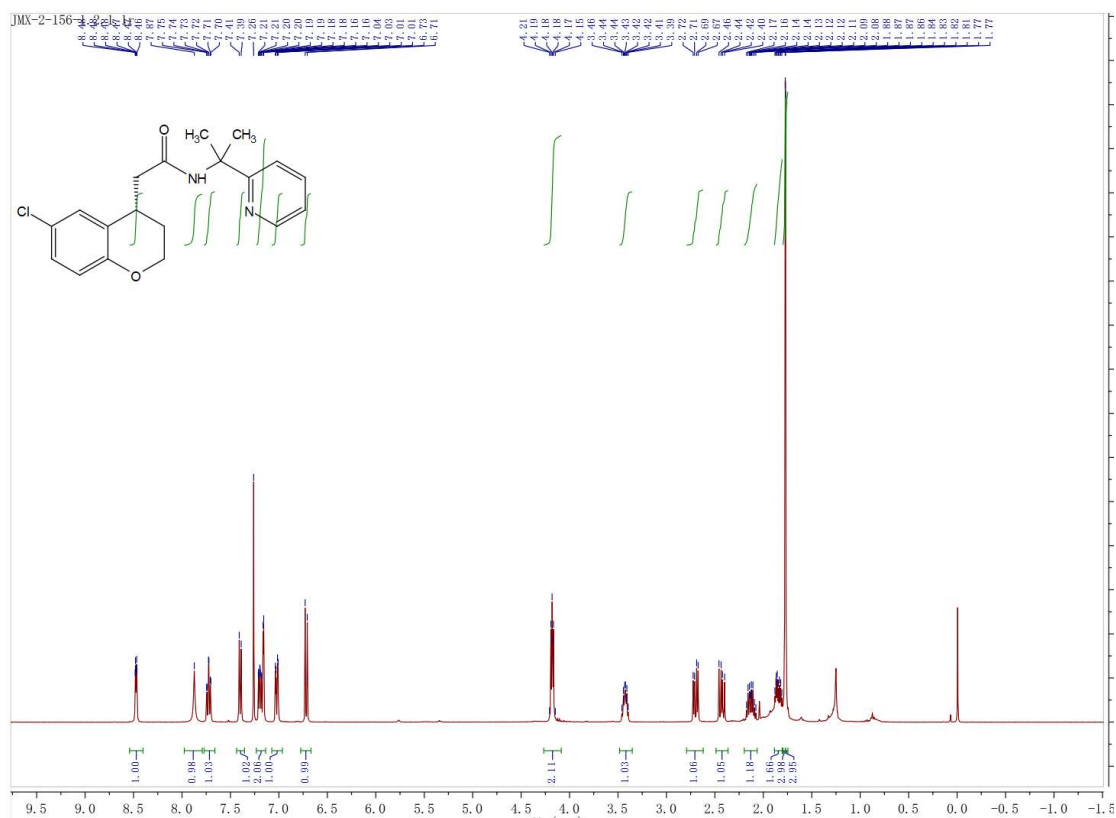

**2e, <sup>13</sup>C NMR, 101 MHz, CDCl<sub>3</sub>**

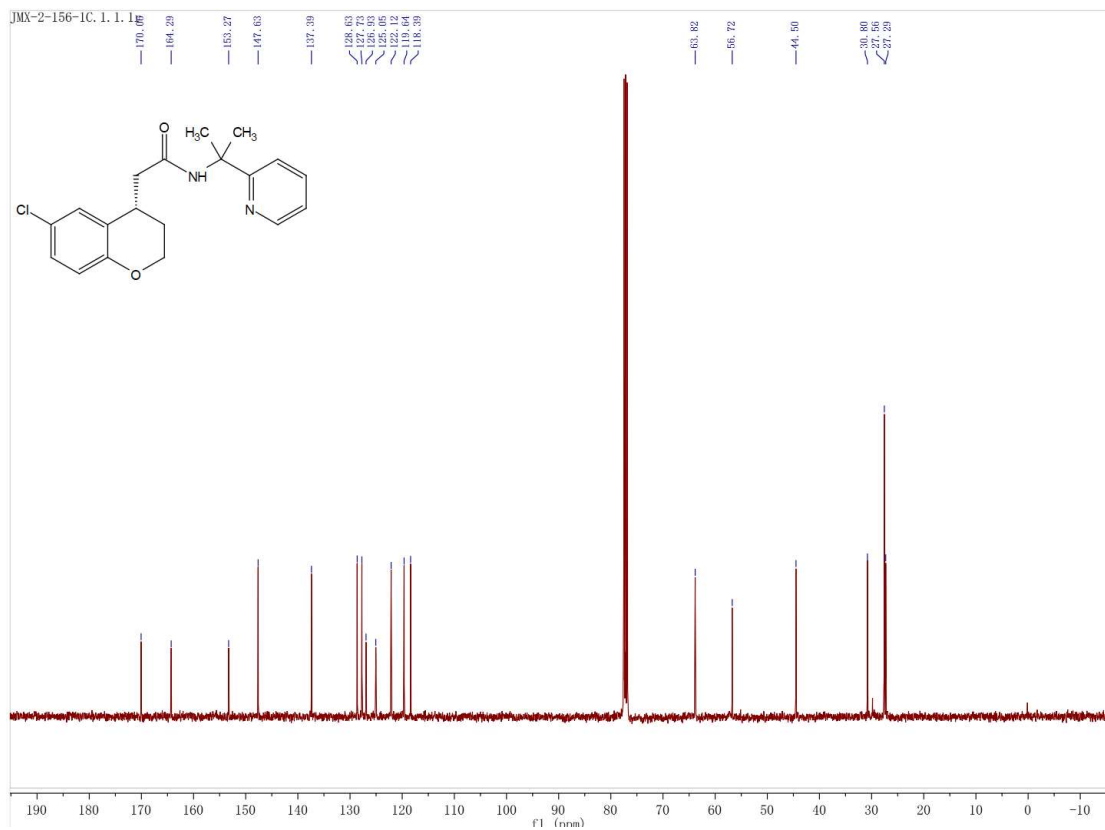

**2f, <sup>1</sup>H NMR, 400 MHz, CDCl<sub>3</sub>**

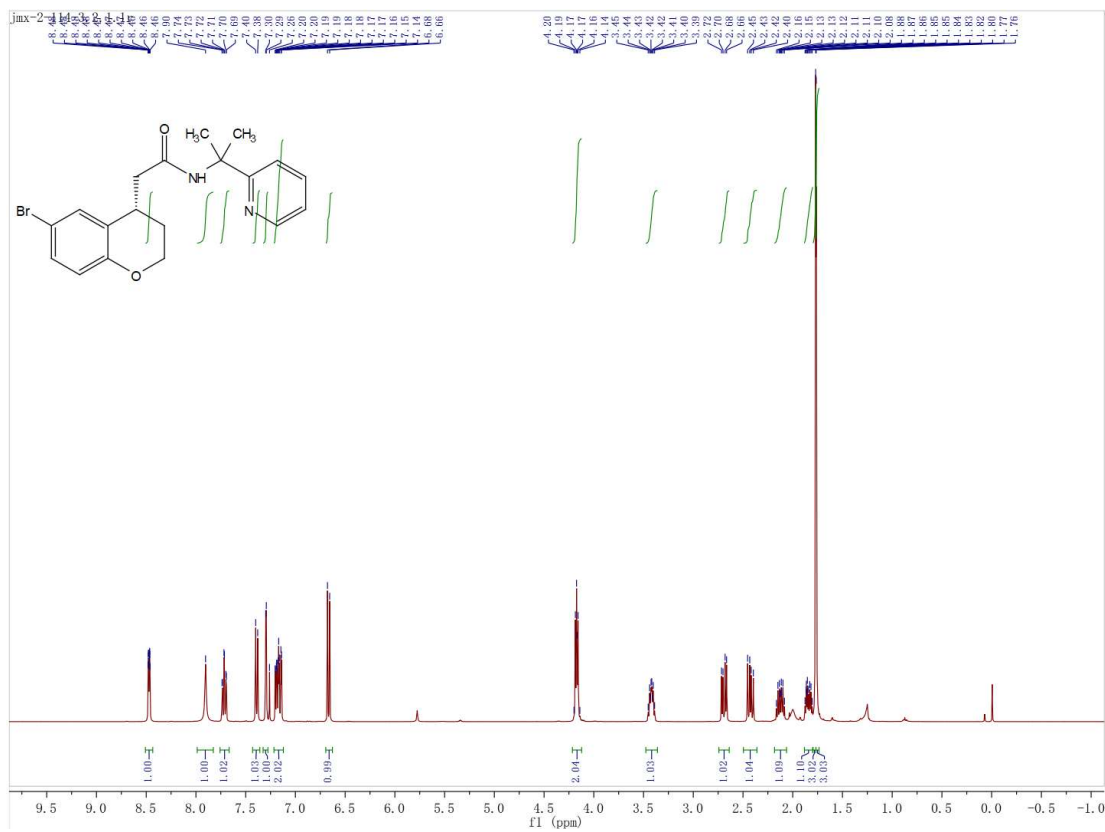

**2f, <sup>13</sup>C NMR, 101 MHz, CDCl<sub>3</sub>**

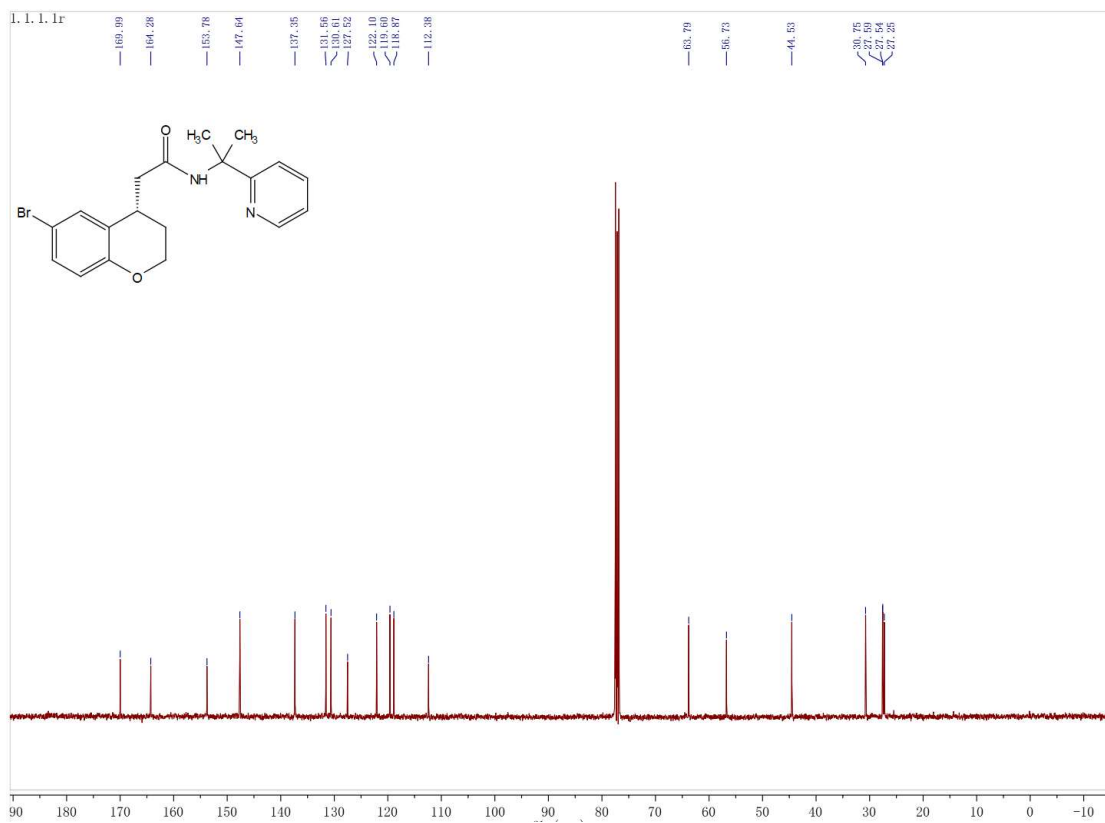

**2g, <sup>1</sup>H NMR, 400 MHz, CDCl<sub>3</sub>**

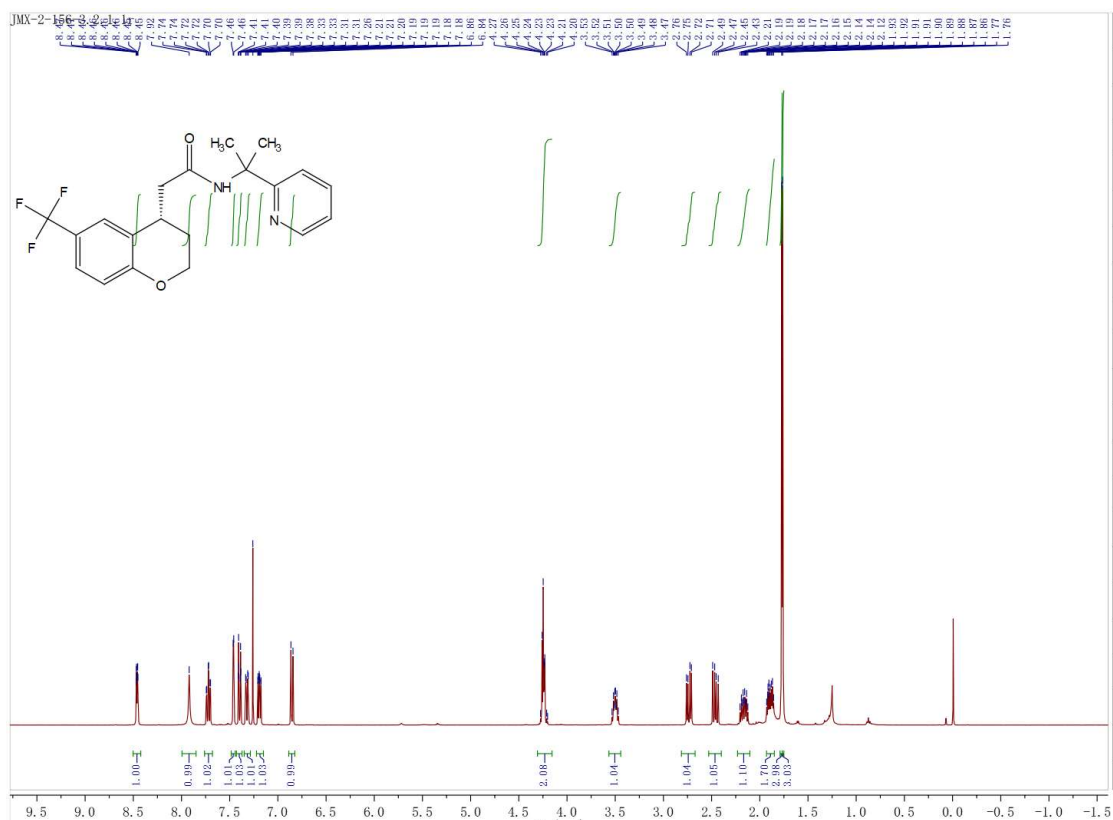

**2g, <sup>13</sup>C NMR, 101 MHz, CDCl<sub>3</sub>**

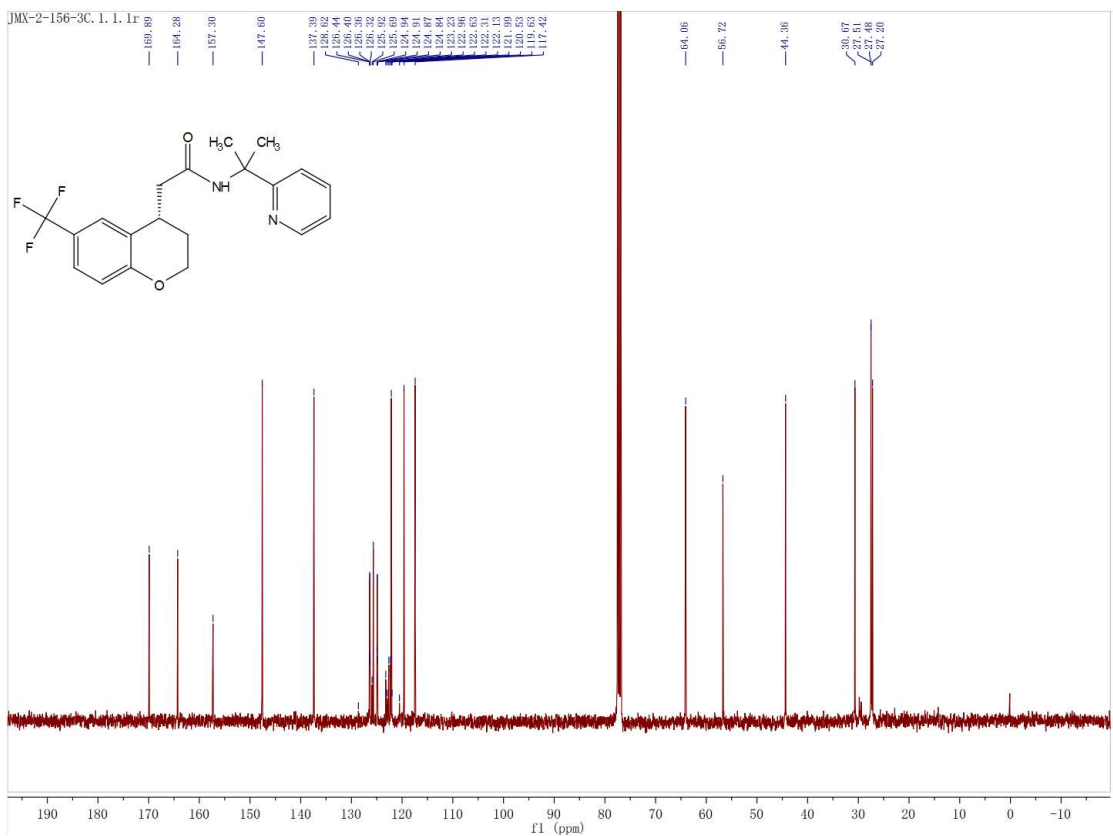

**2g,  $^{19}\text{F}$  NMR, 376 MHz,  $\text{CDCl}_3$**

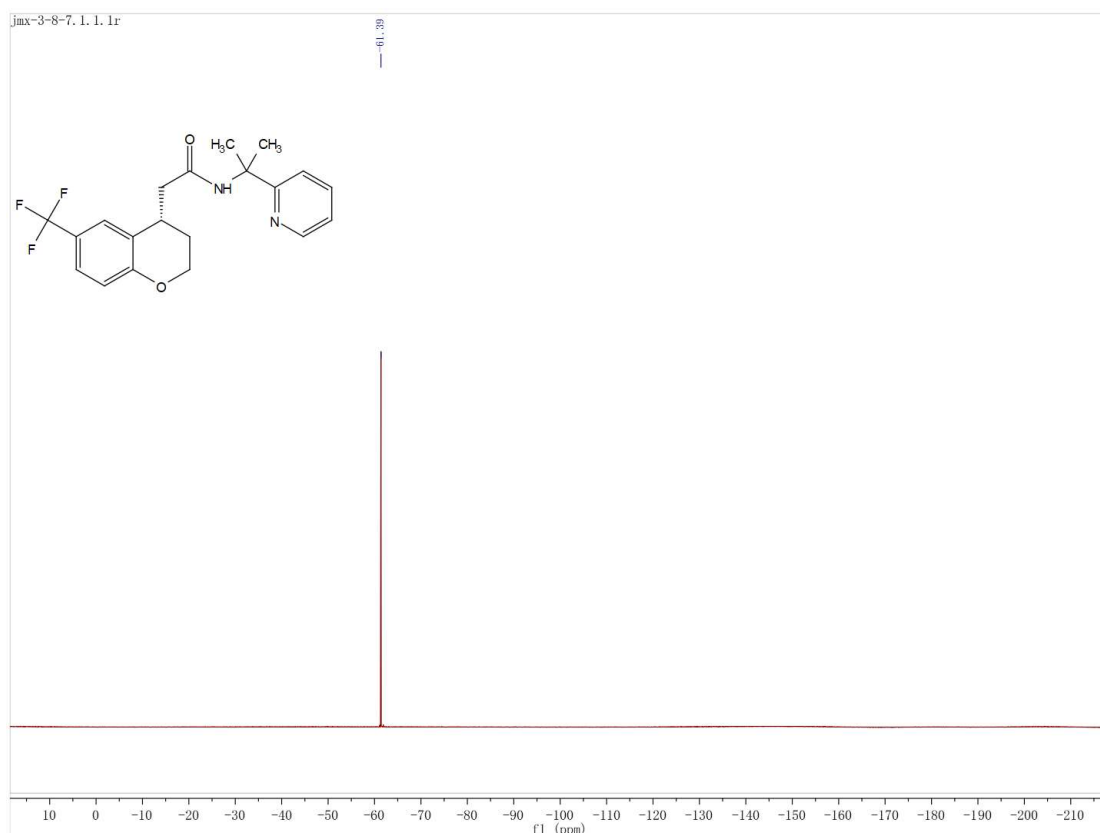

**2h, <sup>1</sup>H NMR, 400 MHz, CDCl<sub>3</sub>**

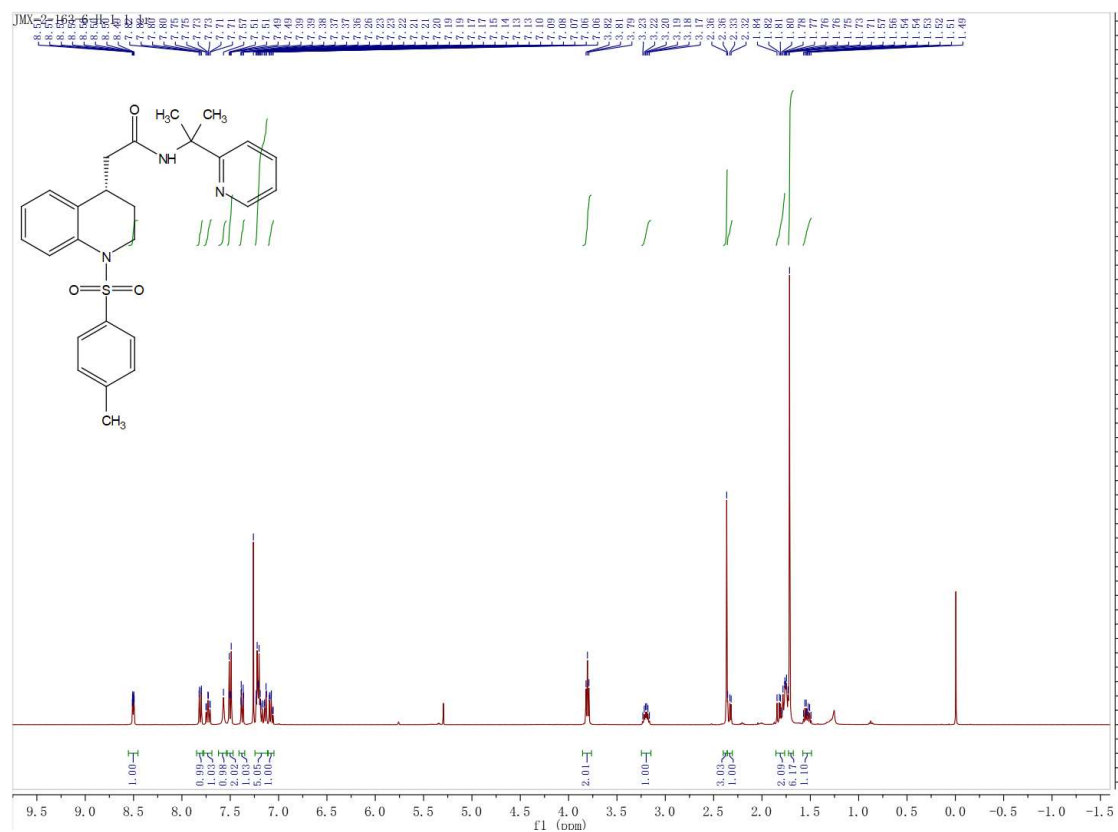

**2h, <sup>13</sup>C NMR, 101 MHz, CDCl<sub>3</sub>**

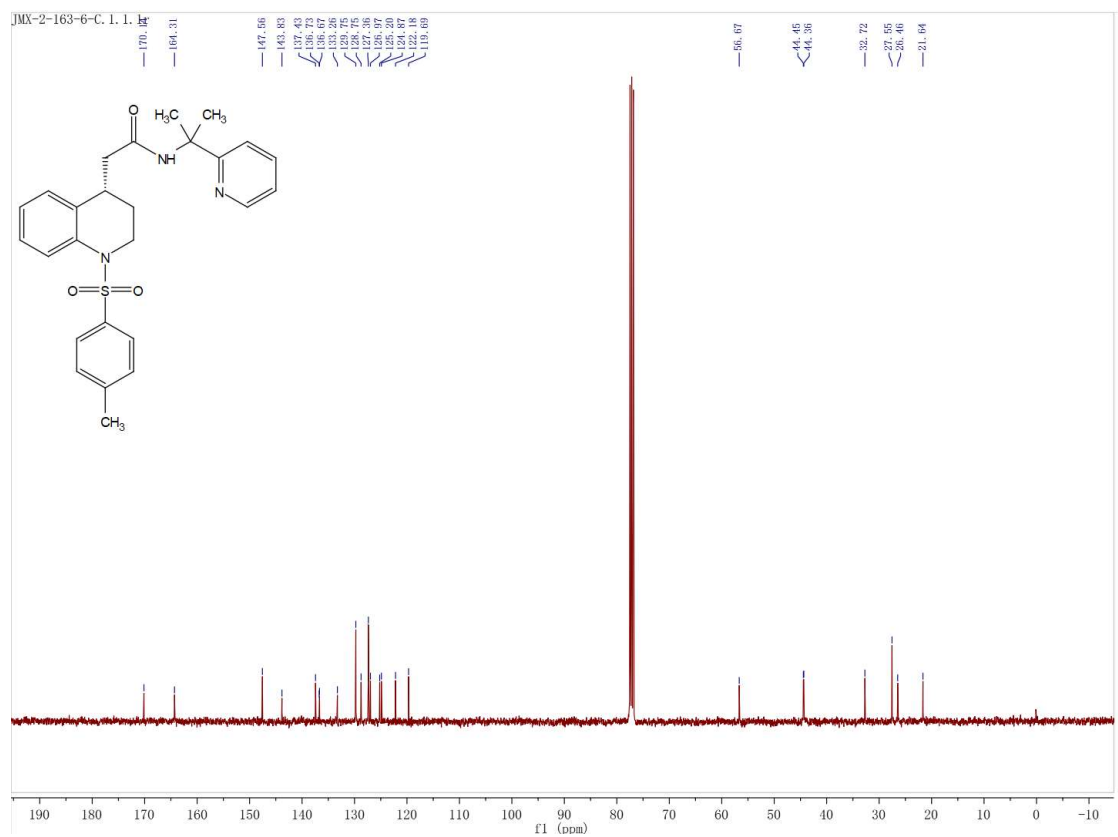

**2i, <sup>1</sup>H NMR, 400 MHz, CDCl<sub>3</sub>**

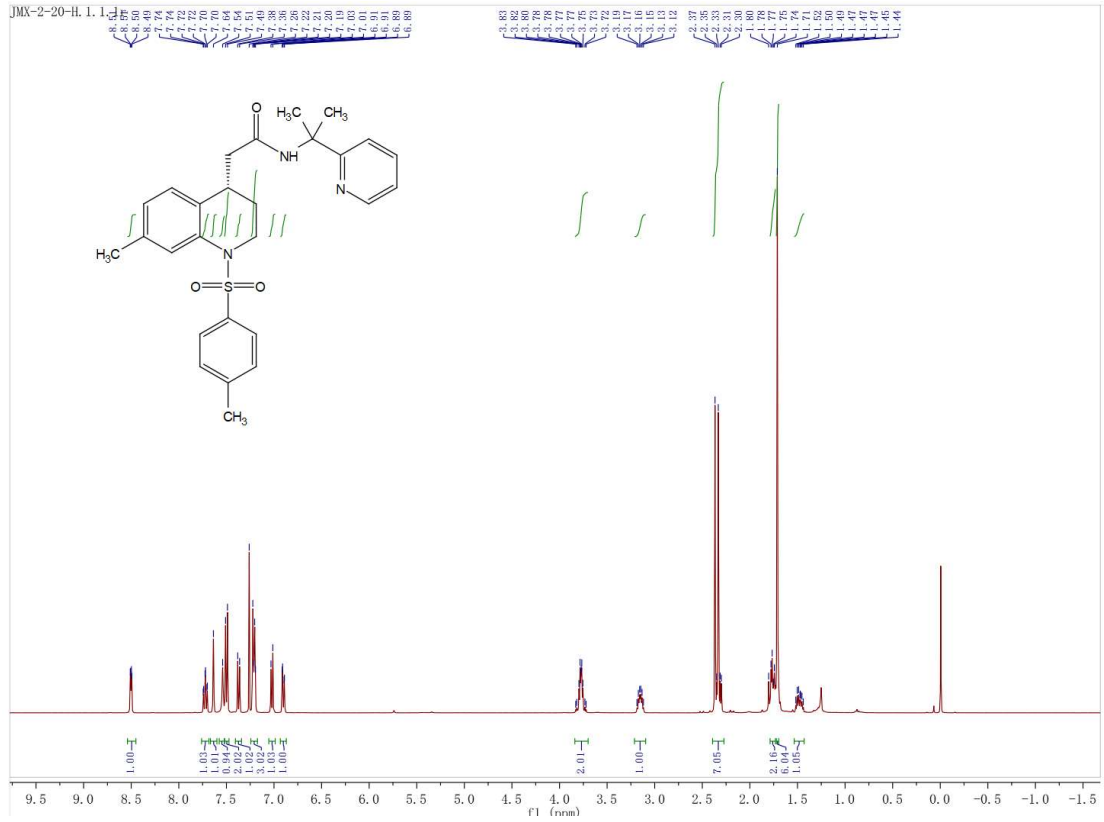

**2i, <sup>13</sup>C NMR, 101 MHz, CDCl<sub>3</sub>**

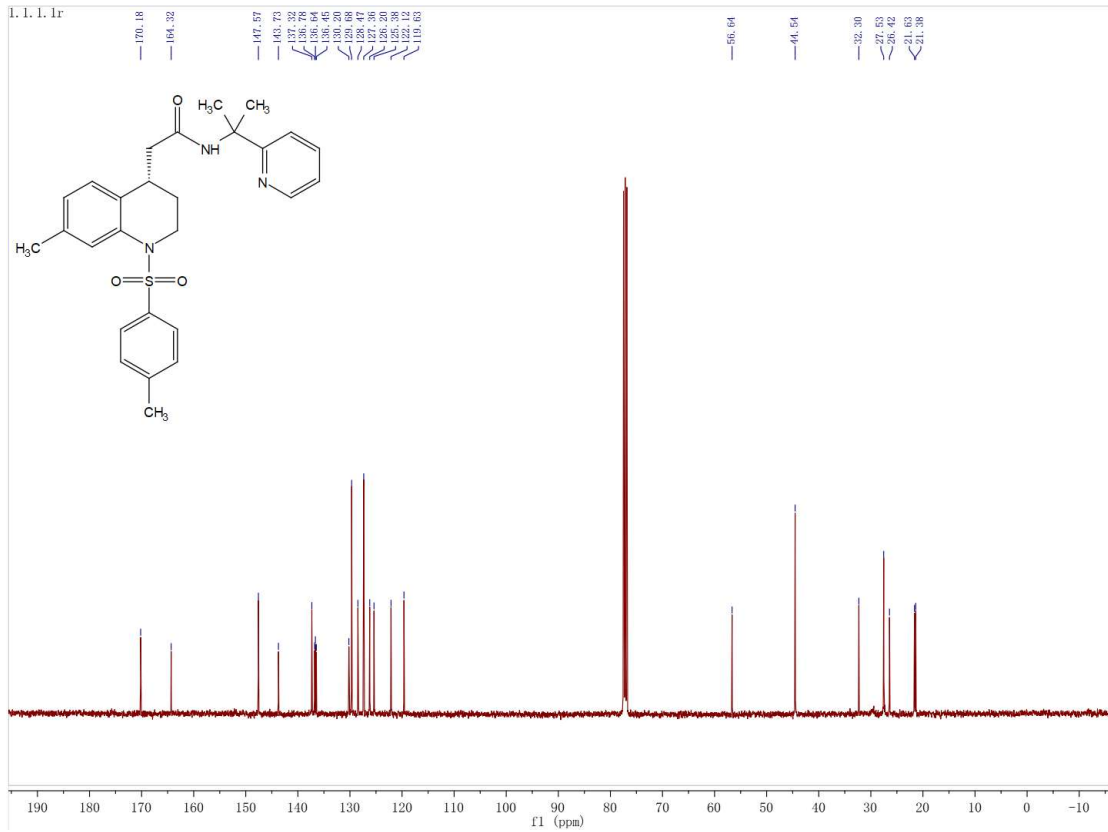

**2j, <sup>1</sup>H NMR, 400 MHz, CDCl<sub>3</sub>**

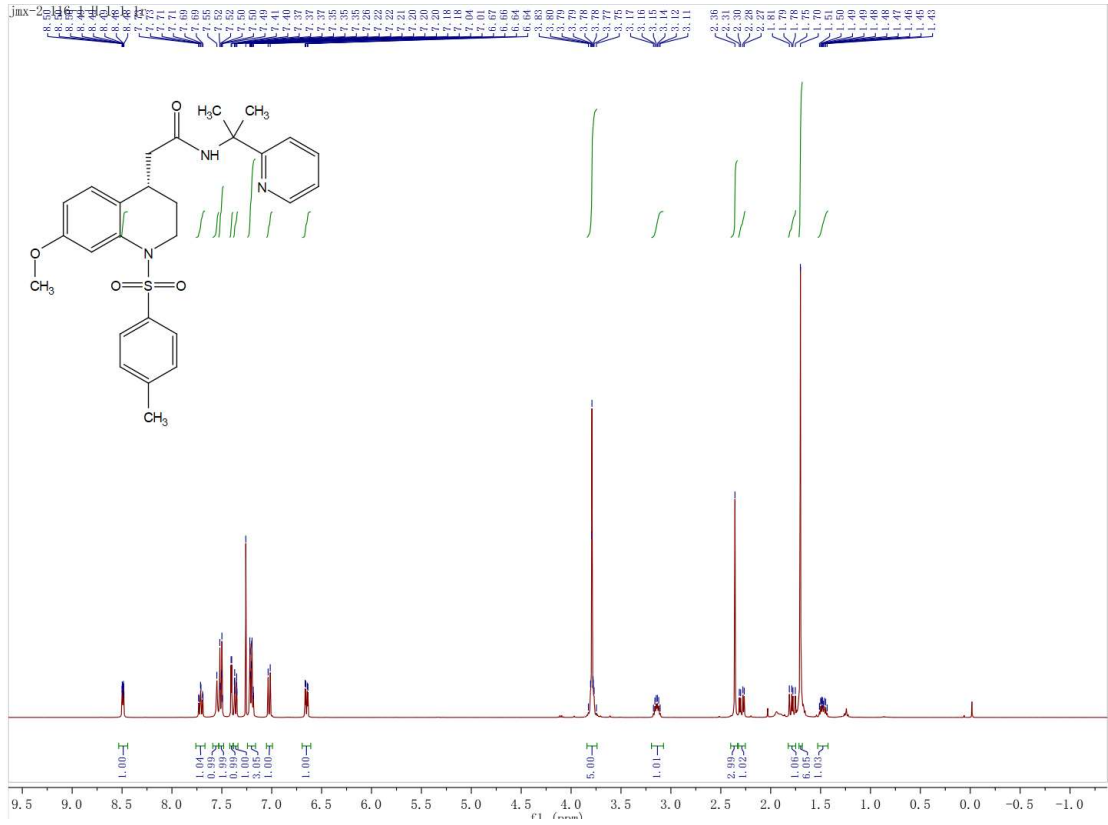

**2j, <sup>13</sup>C NMR, 101 MHz, CDCl<sub>3</sub>**

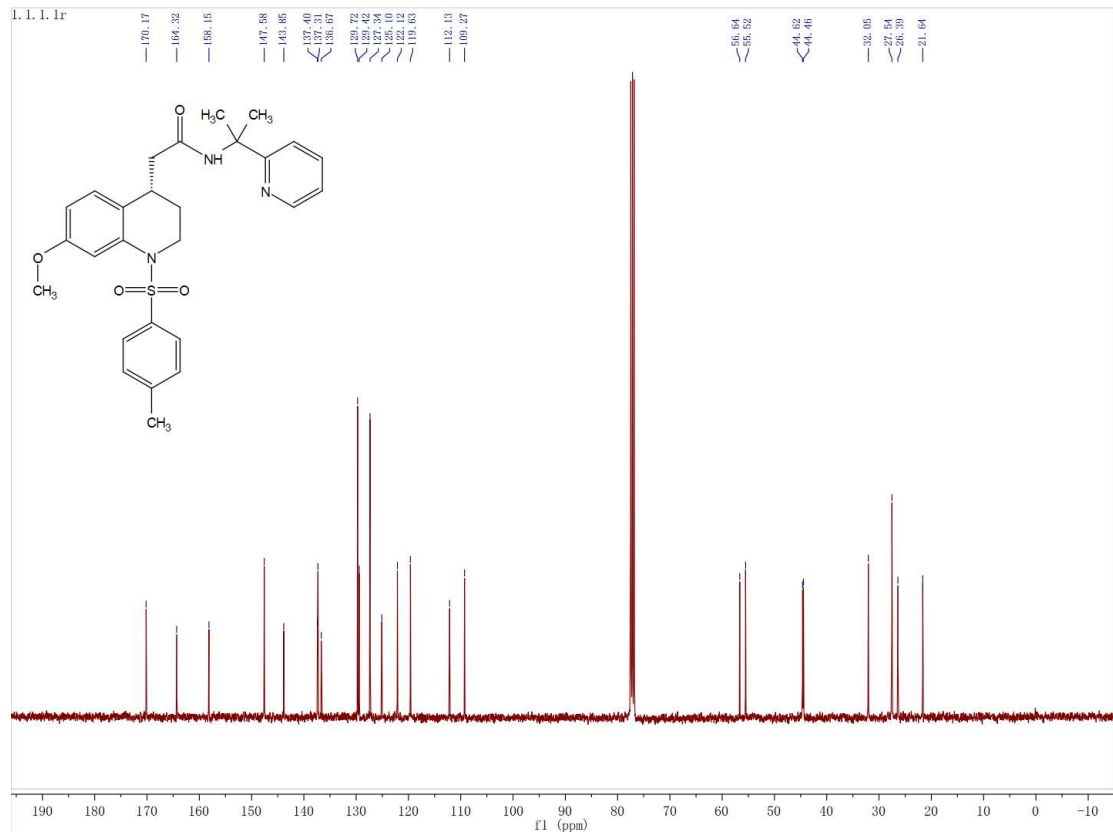



**2k, <sup>1</sup>H NMR, 400 MHz, CDCl<sub>3</sub>**

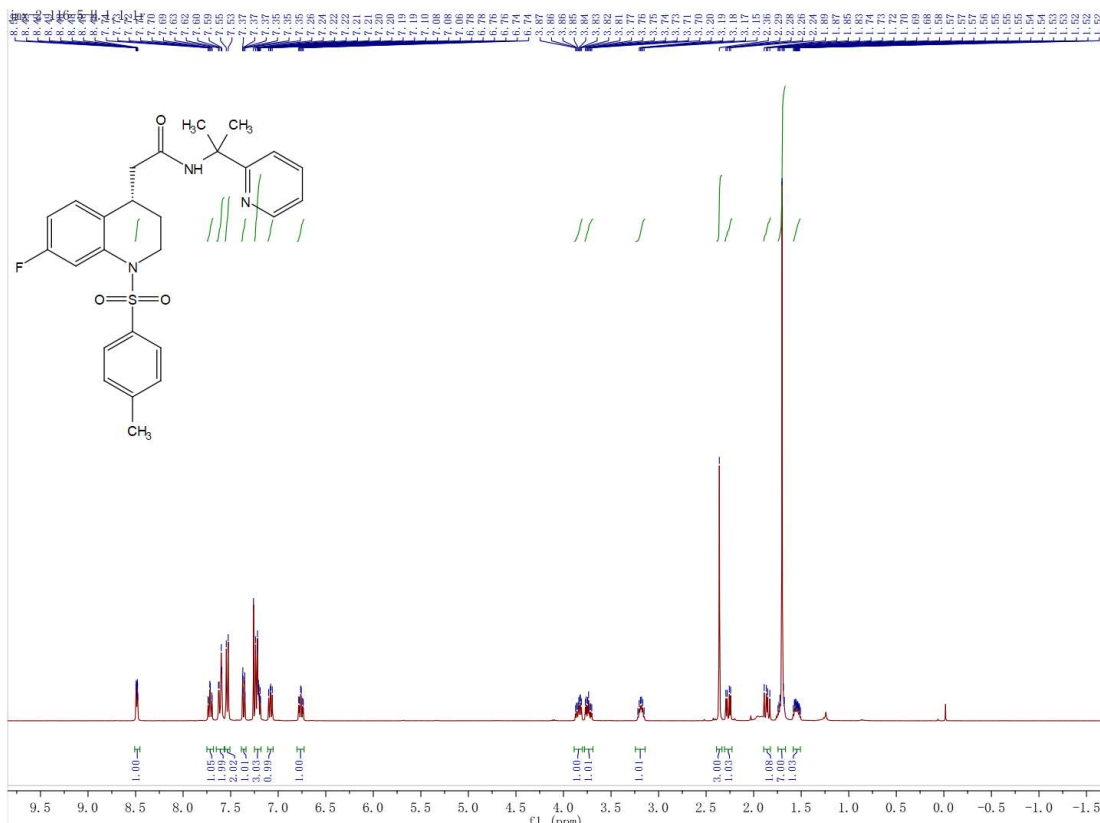

**2k, <sup>13</sup>C NMR, 101 MHz, CDCl<sub>3</sub>**

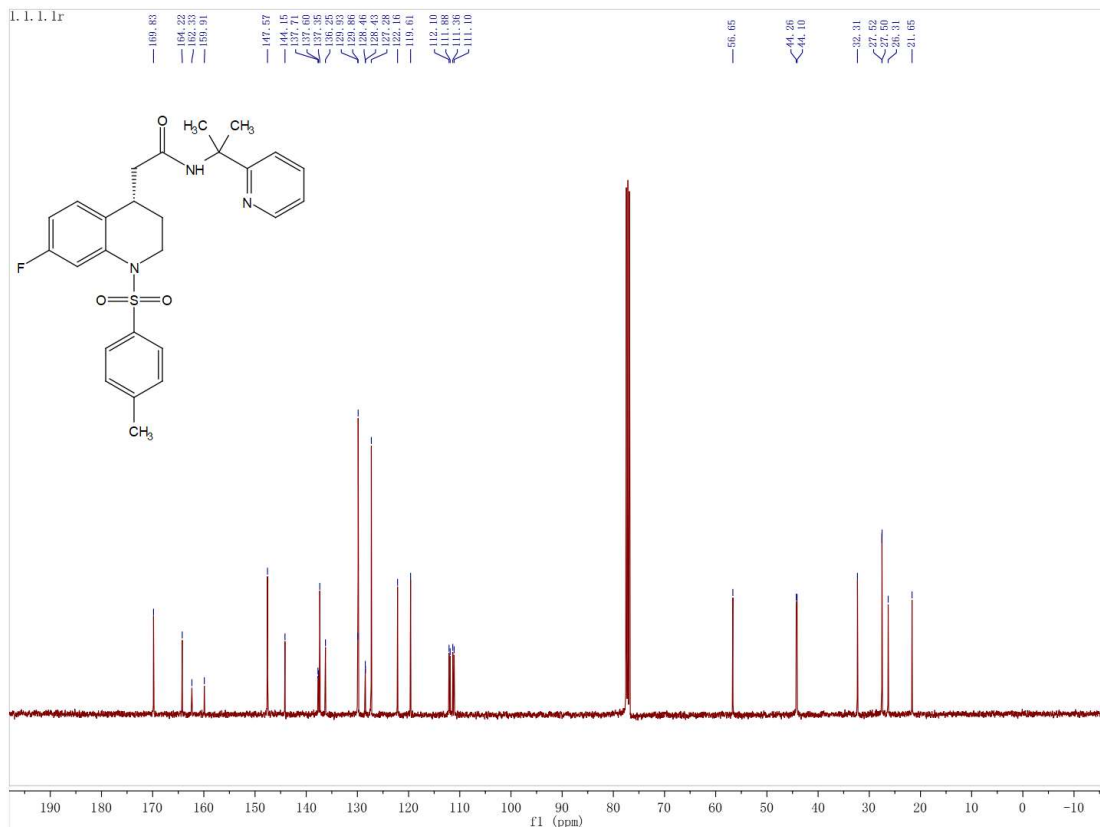

**2k,  $^{19}\text{F}$  NMR, 376 MHz,  $\text{CDCl}_3$**

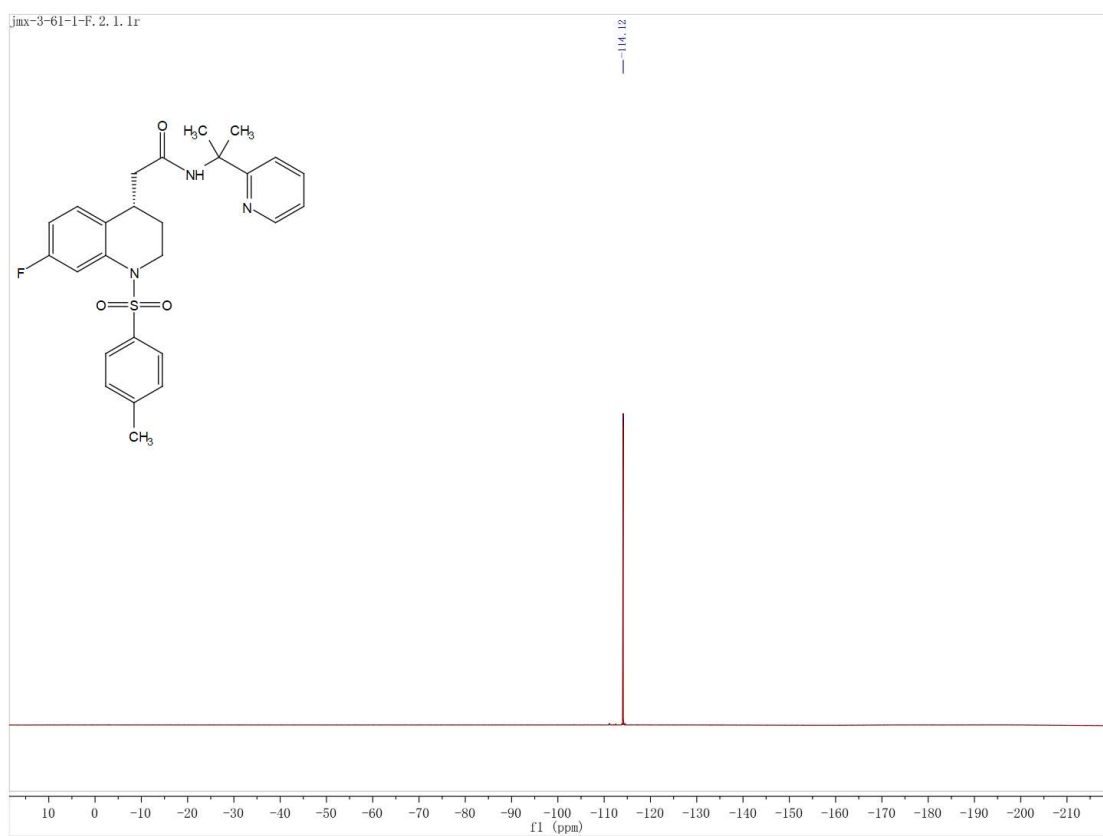

2l, <sup>1</sup>H NMR, 400 MHz, CDCl<sub>3</sub>

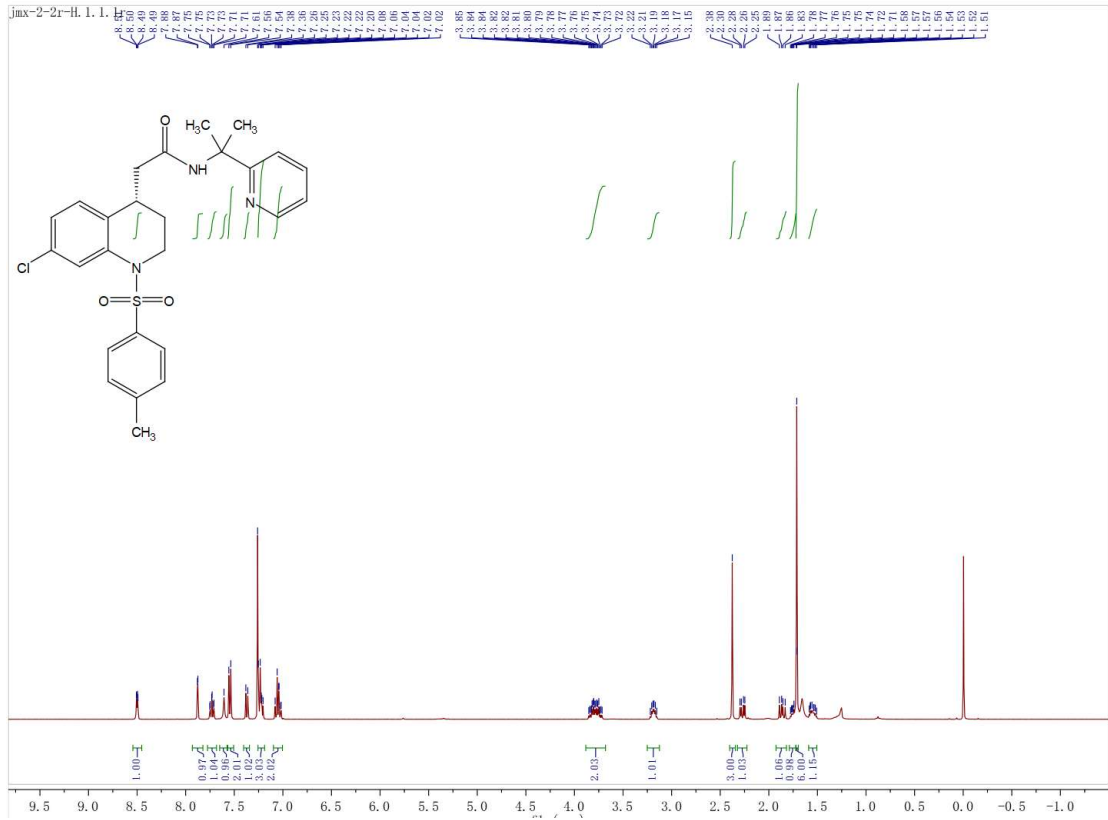

2l, <sup>13</sup>C NMR, 101 MHz, CDCl<sub>3</sub>

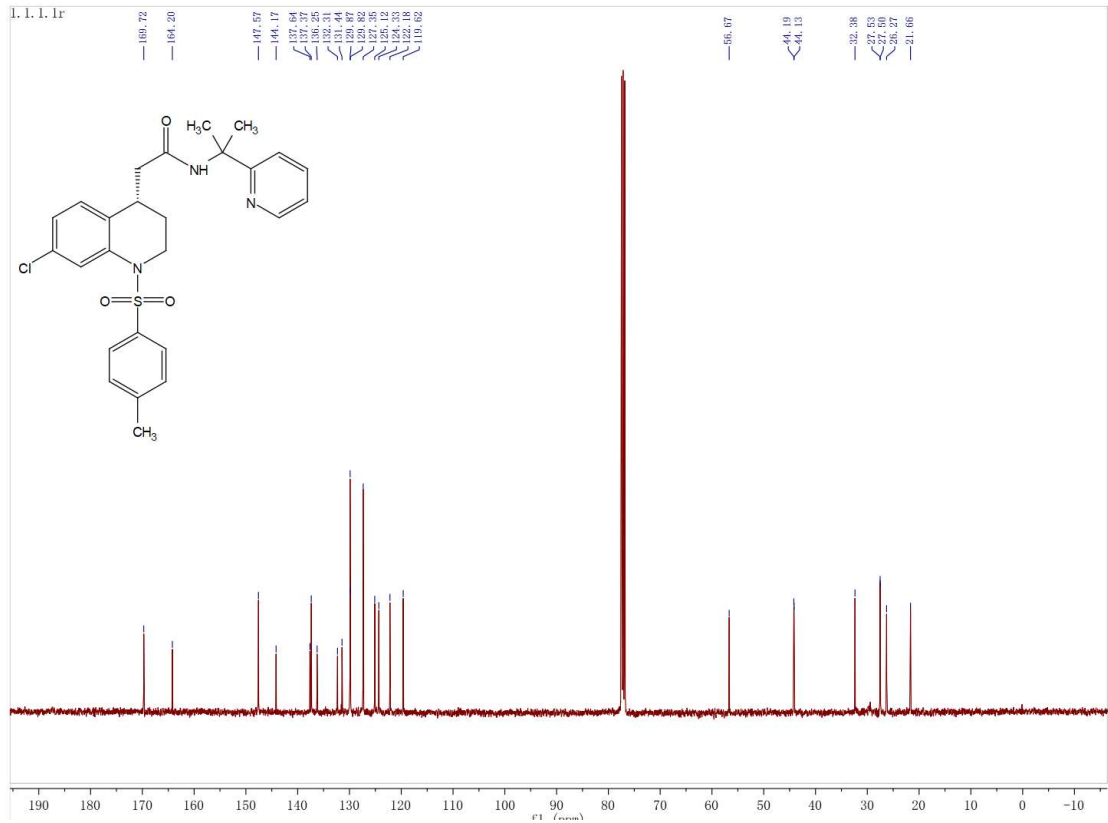

2m, <sup>1</sup>H NMR, 400 MHz, CDCl<sub>3</sub>

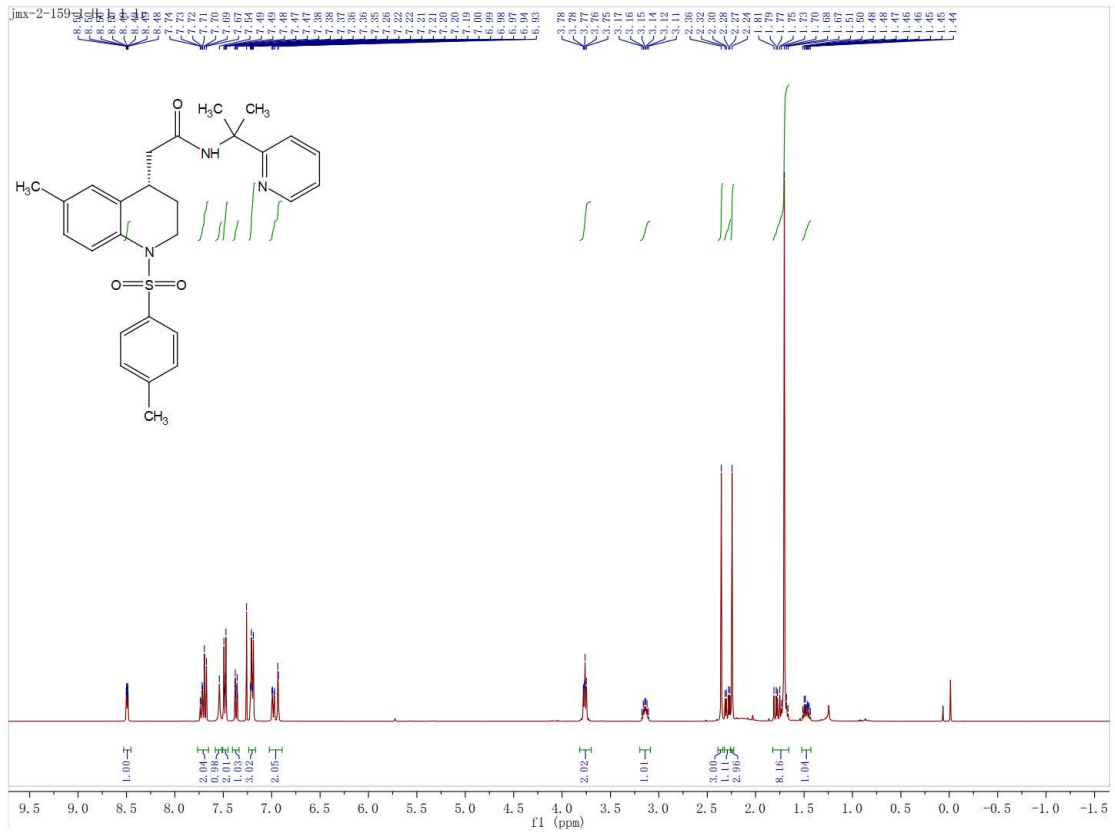

2m, <sup>13</sup>C NMR, 101 MHz, CDCl<sub>3</sub>

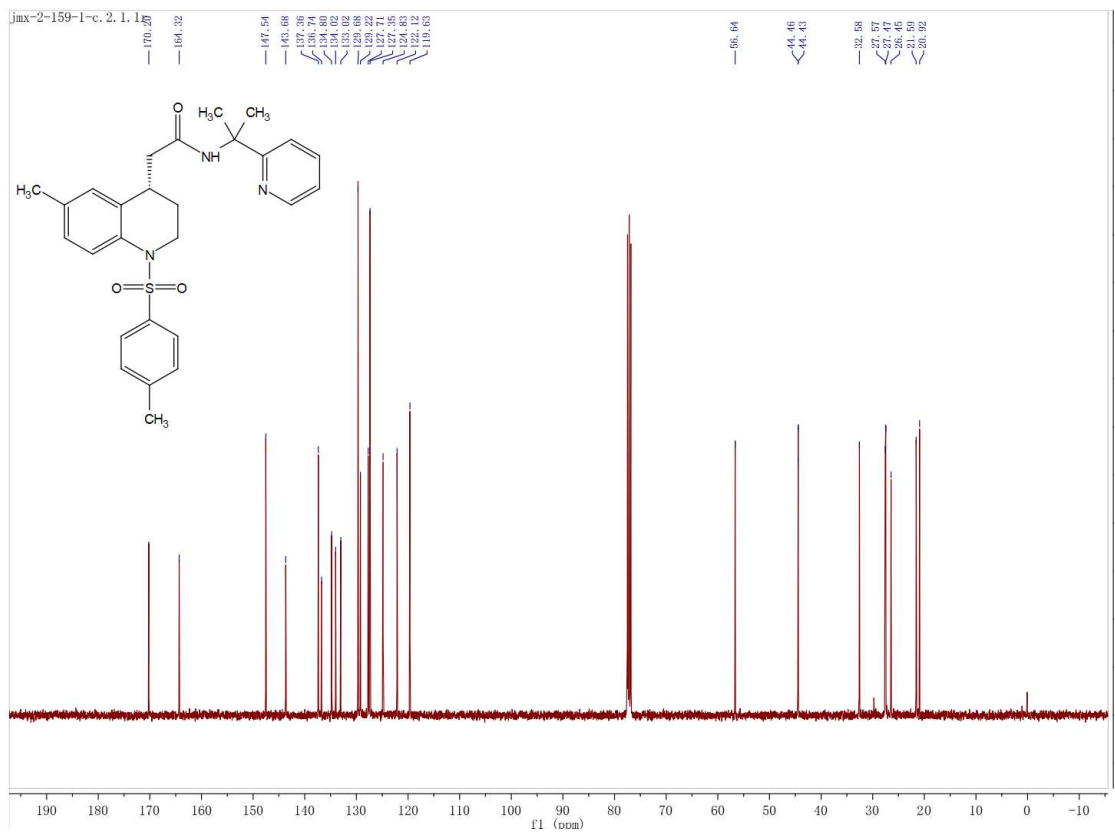

**2n, <sup>1</sup>H NMR, 400 MHz, CDCl<sub>3</sub>**

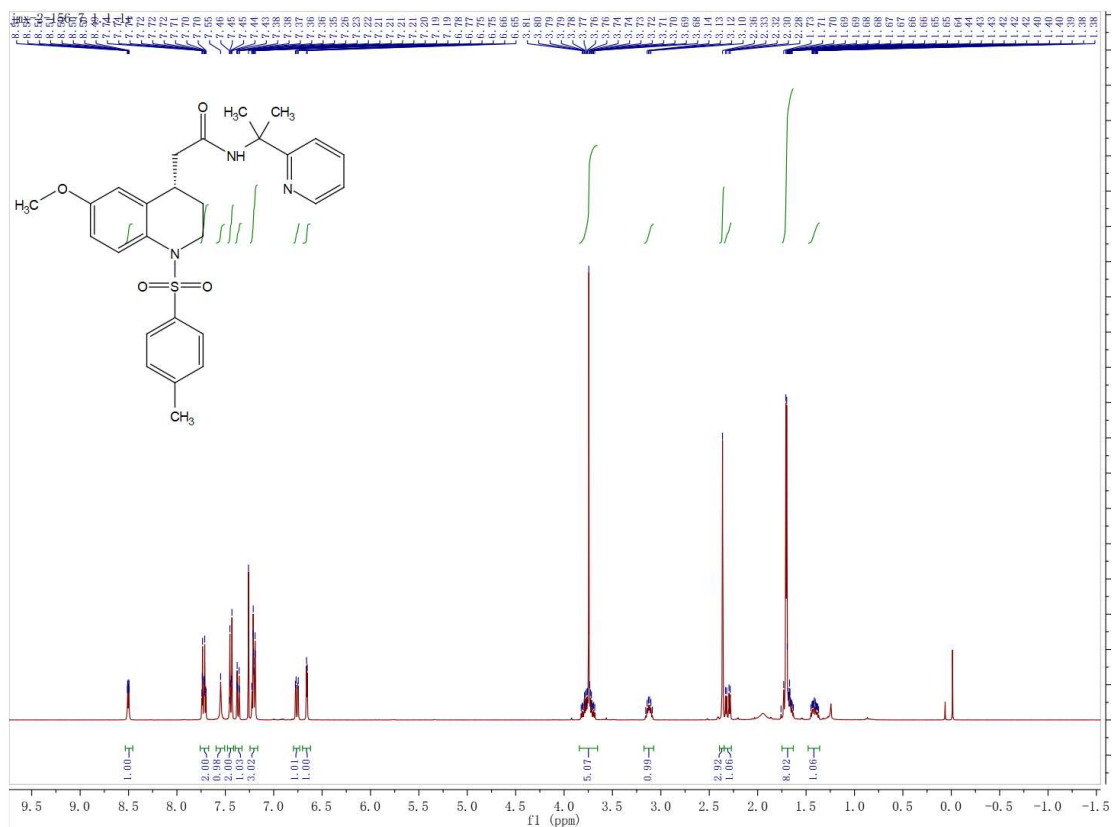

**2n, <sup>13</sup>C NMR, 101 MHz, CDCl<sub>3</sub>**

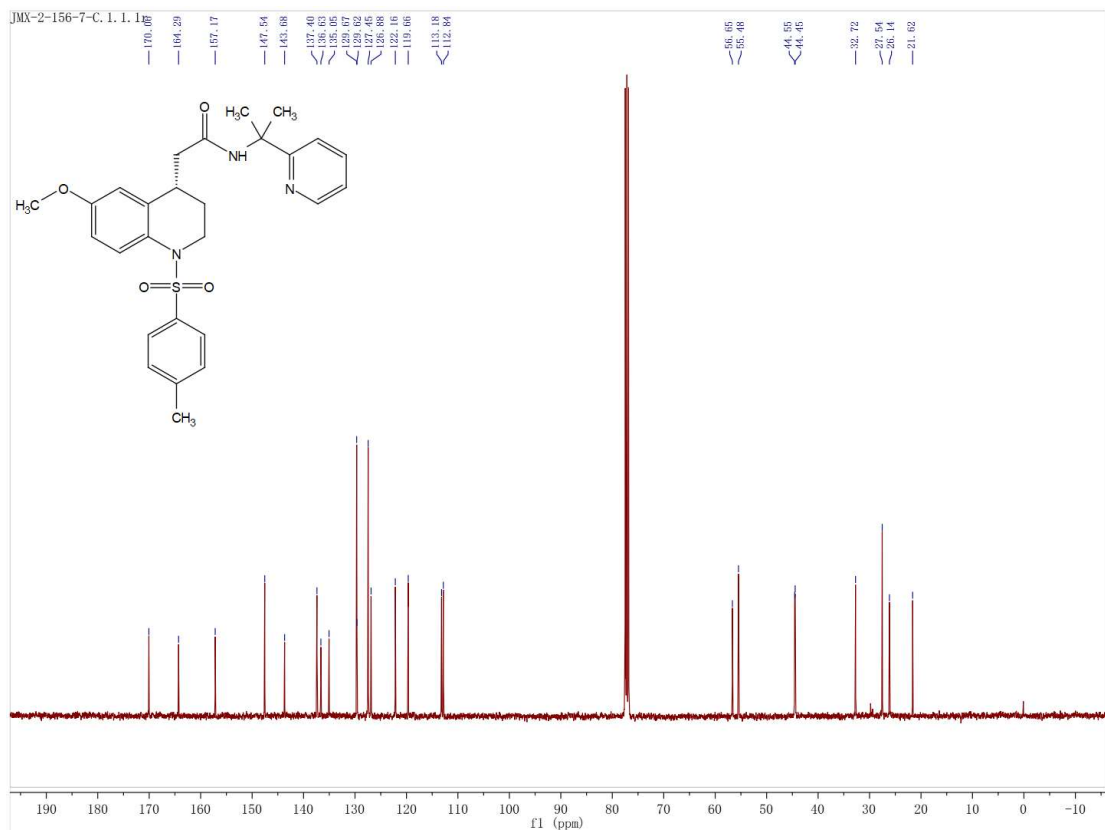

**2o,  $^1\text{H}$  NMR, 400 MHz,  $\text{CDCl}_3$**

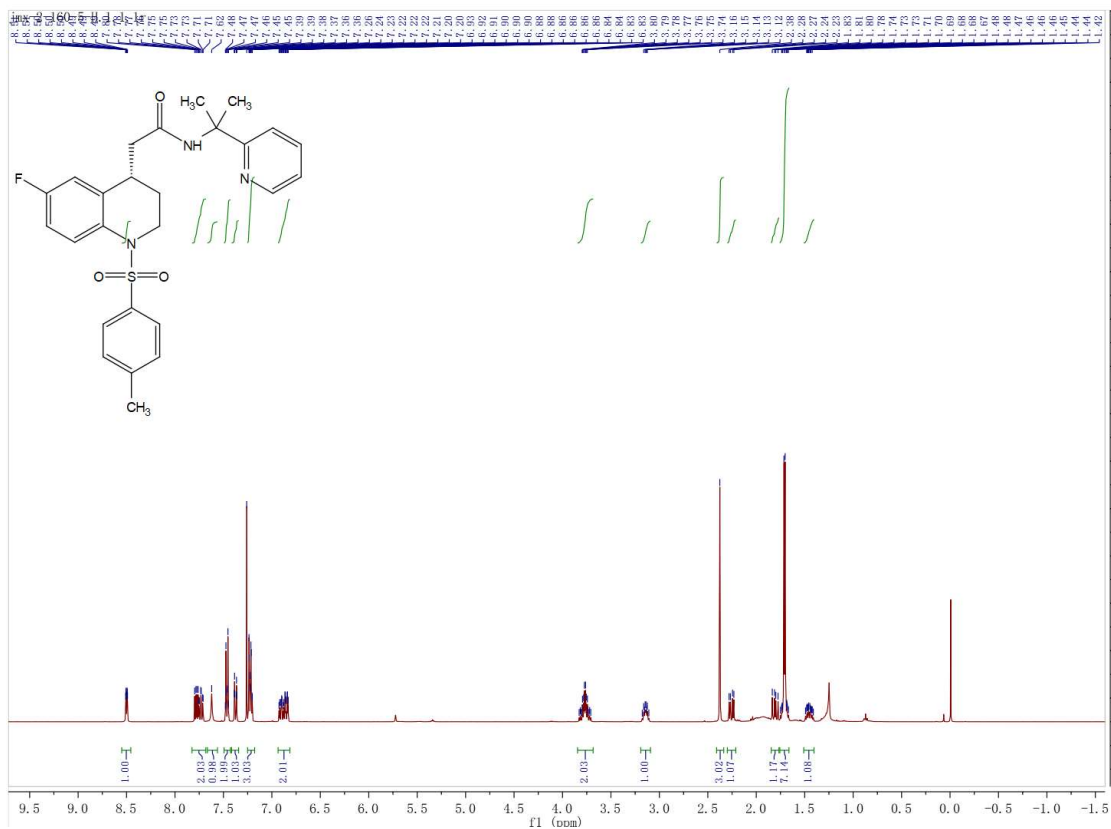

**2o,  $^{13}\text{C}$  NMR, 101 MHz,  $\text{CDCl}_3$**

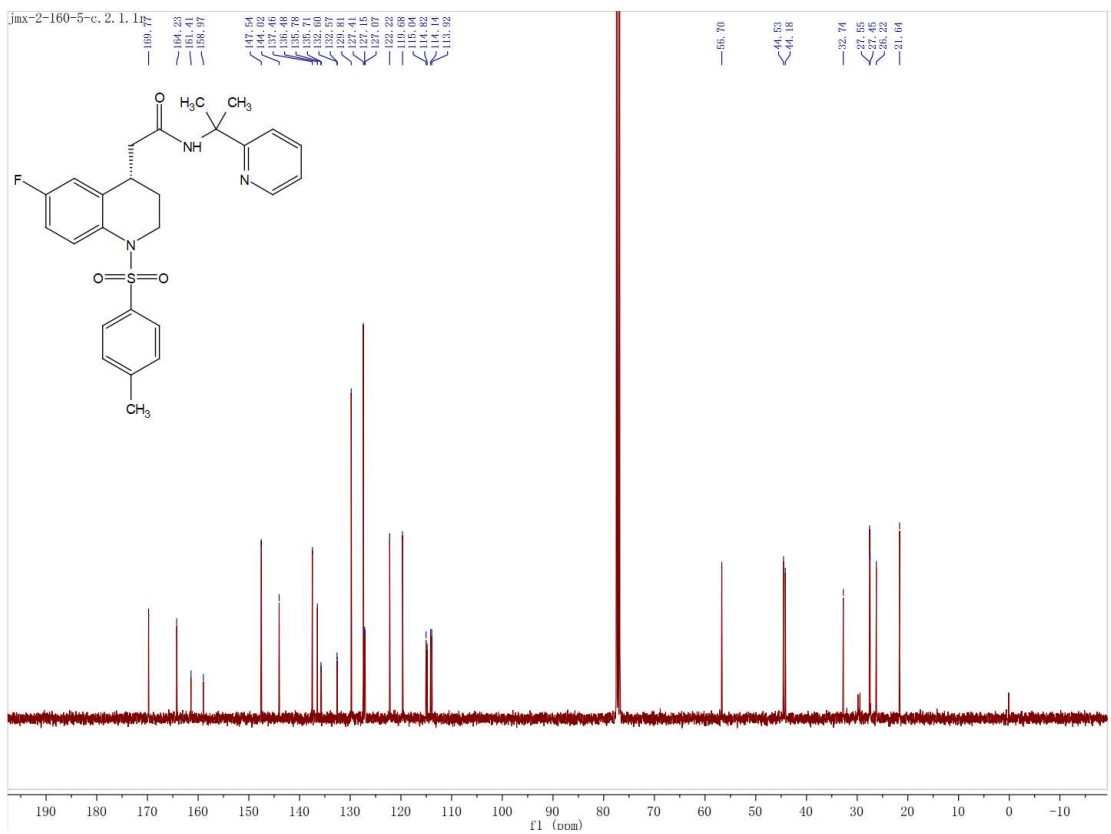

**2o,  $^{19}\text{F}$  NMR, 376 MHz,  $\text{CDCl}_3$**

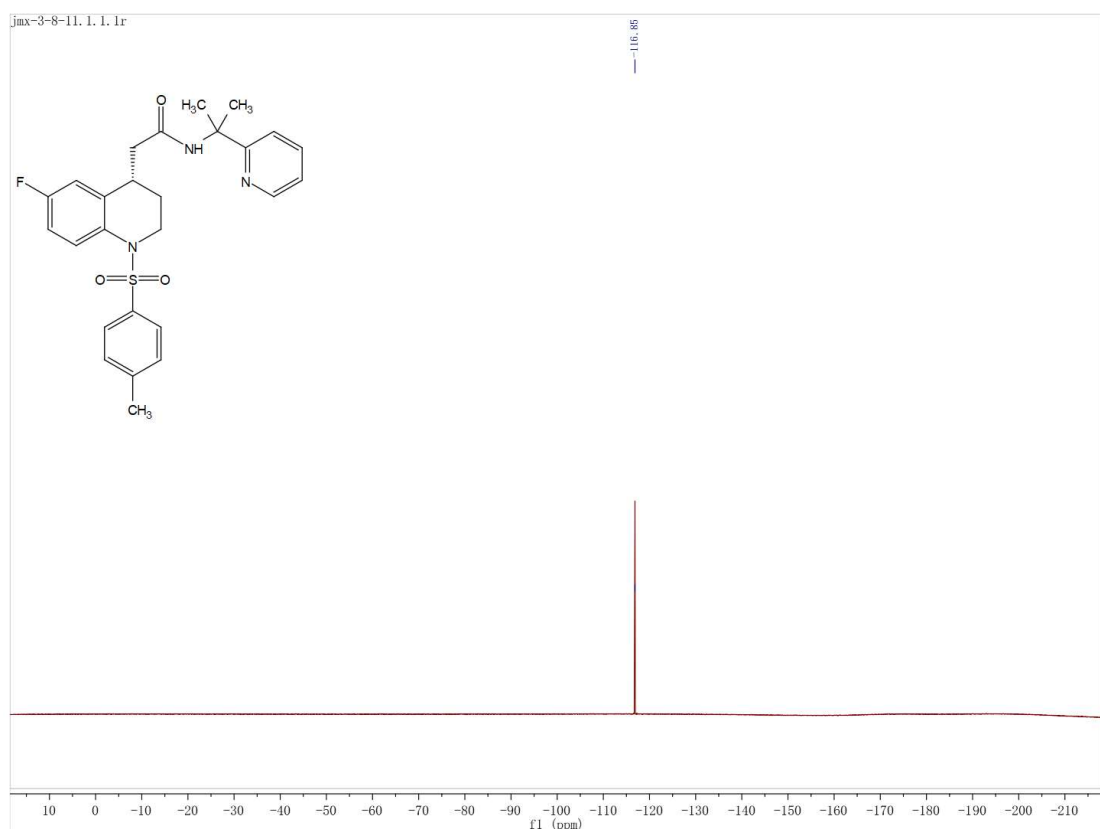

2p, <sup>1</sup>H NMR, 400 MHz, CDCl<sub>3</sub>

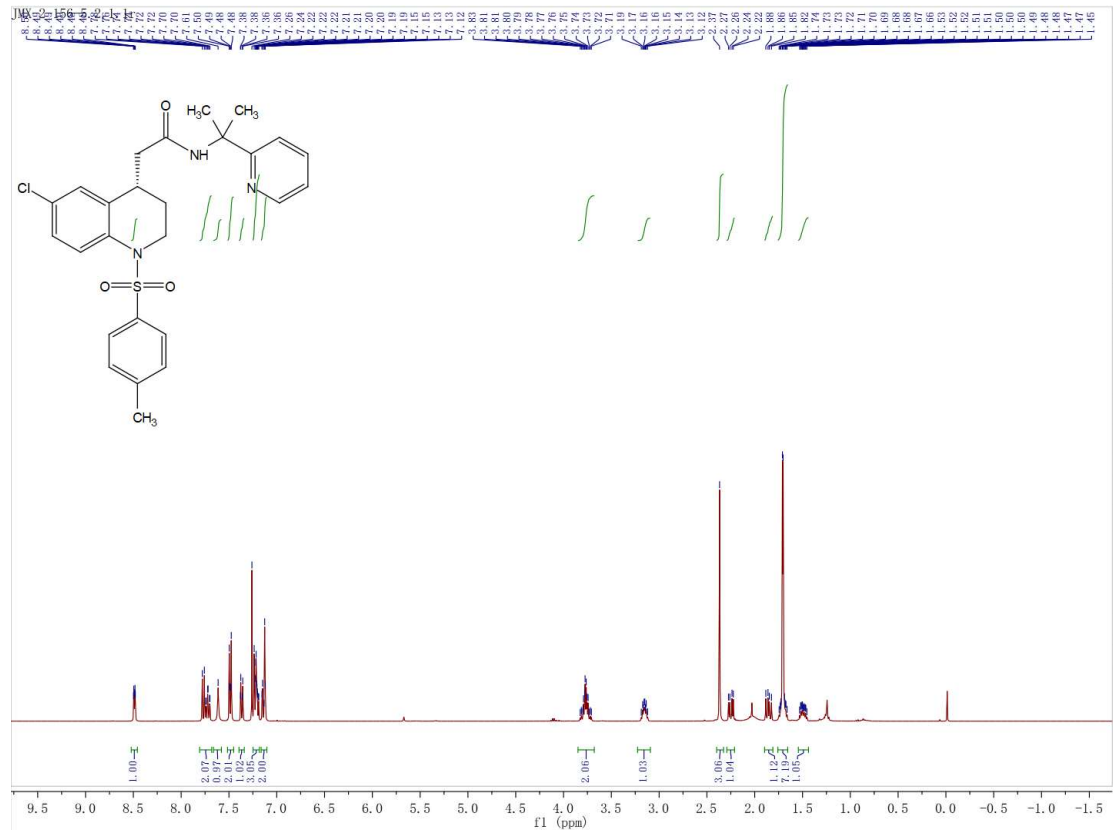

2p, <sup>13</sup>C NMR, 101 MHz, CDCl<sub>3</sub>

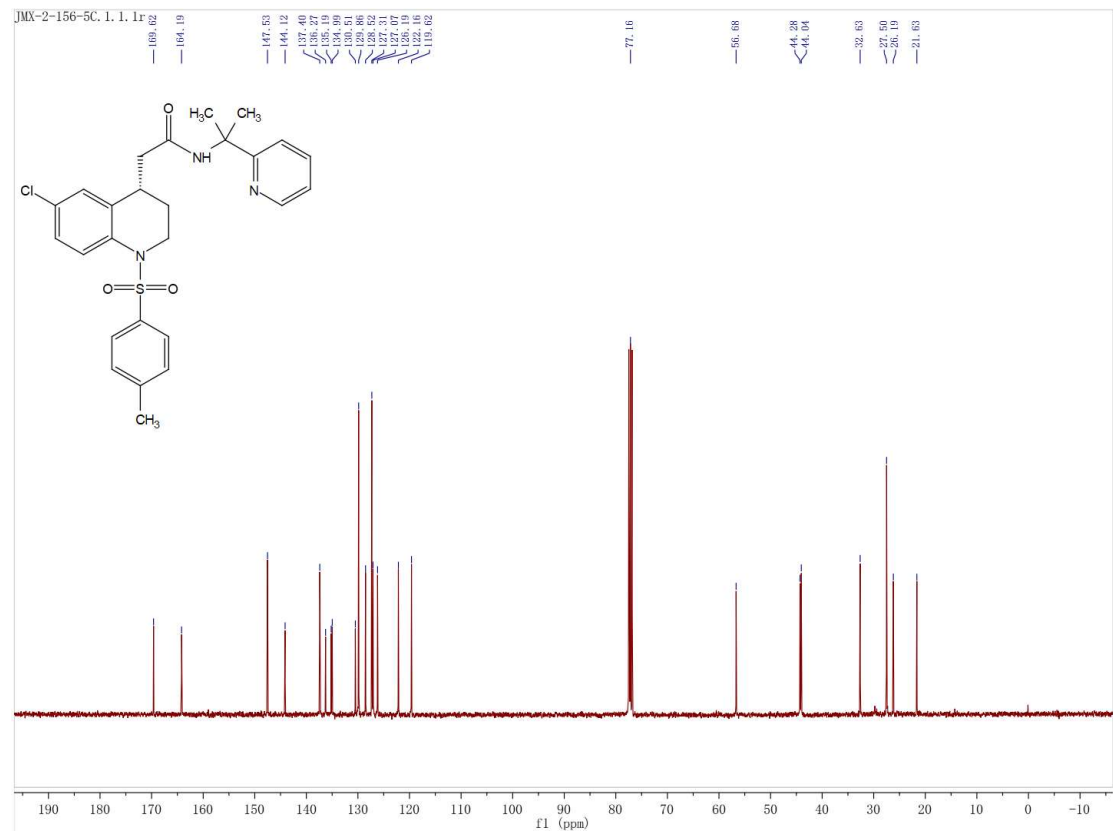



**2q, <sup>1</sup>H NMR, 400 MHz, CDCl<sub>3</sub>**

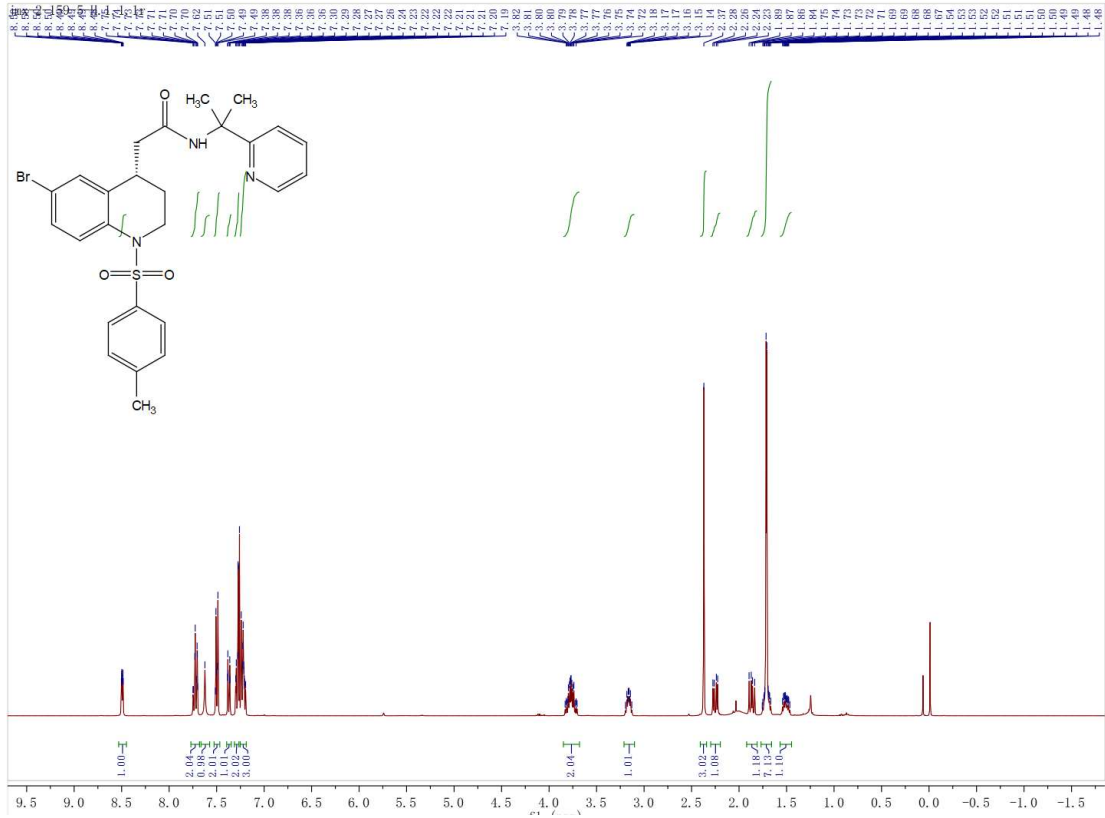

**2q, <sup>13</sup>C NMR, 101 MHz, CDCl<sub>3</sub>**

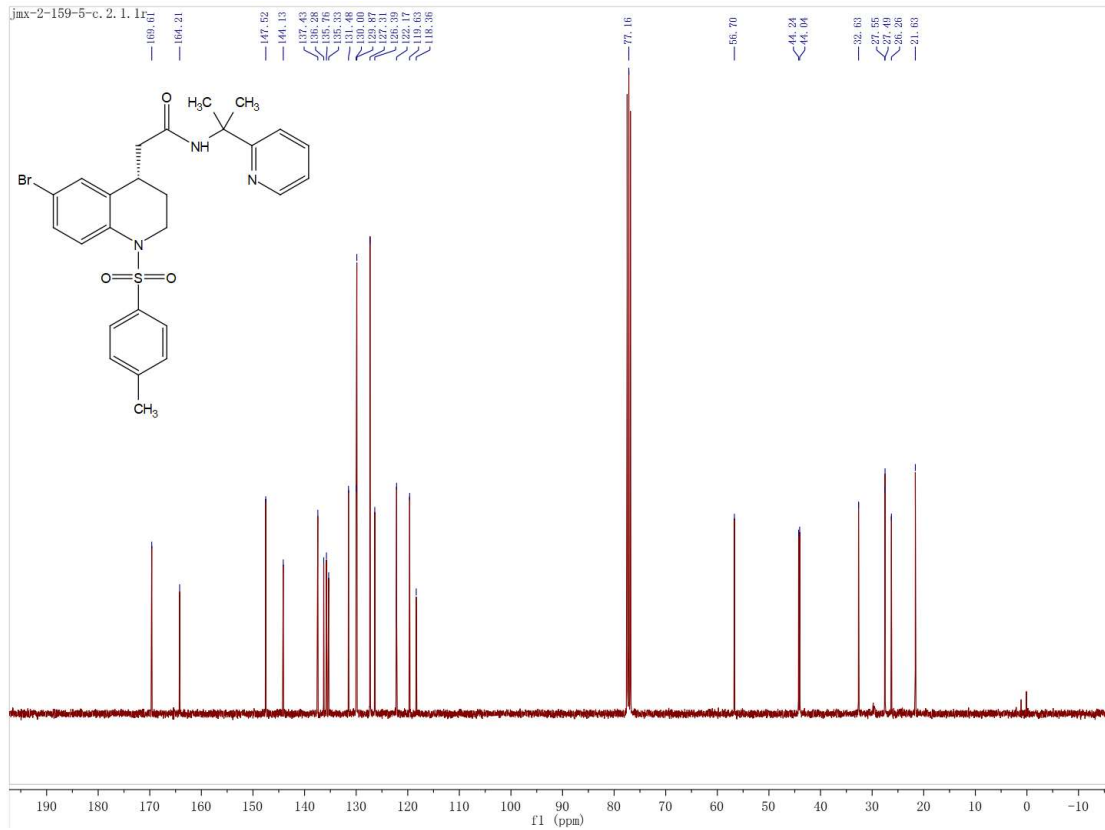

**2r, <sup>1</sup>H NMR, 400 MHz, CDCl<sub>3</sub>**

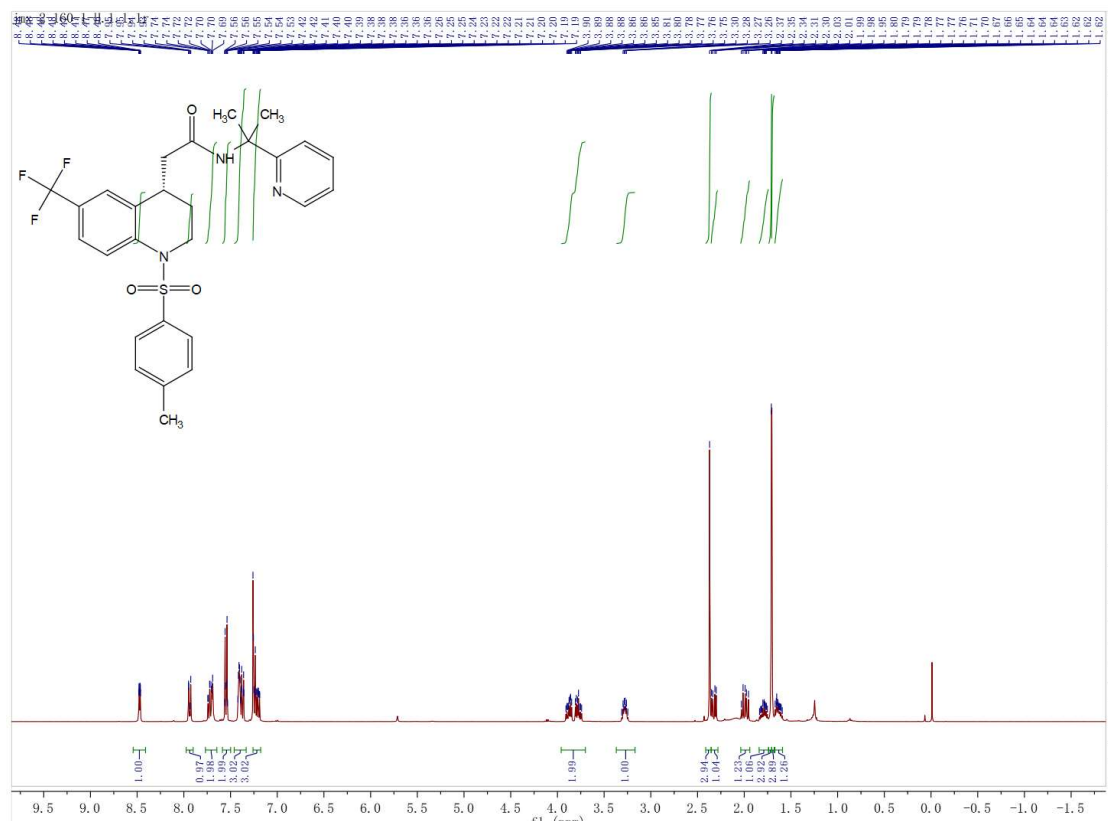

**2r, <sup>13</sup>C NMR, 101 MHz, CDCl<sub>3</sub>**

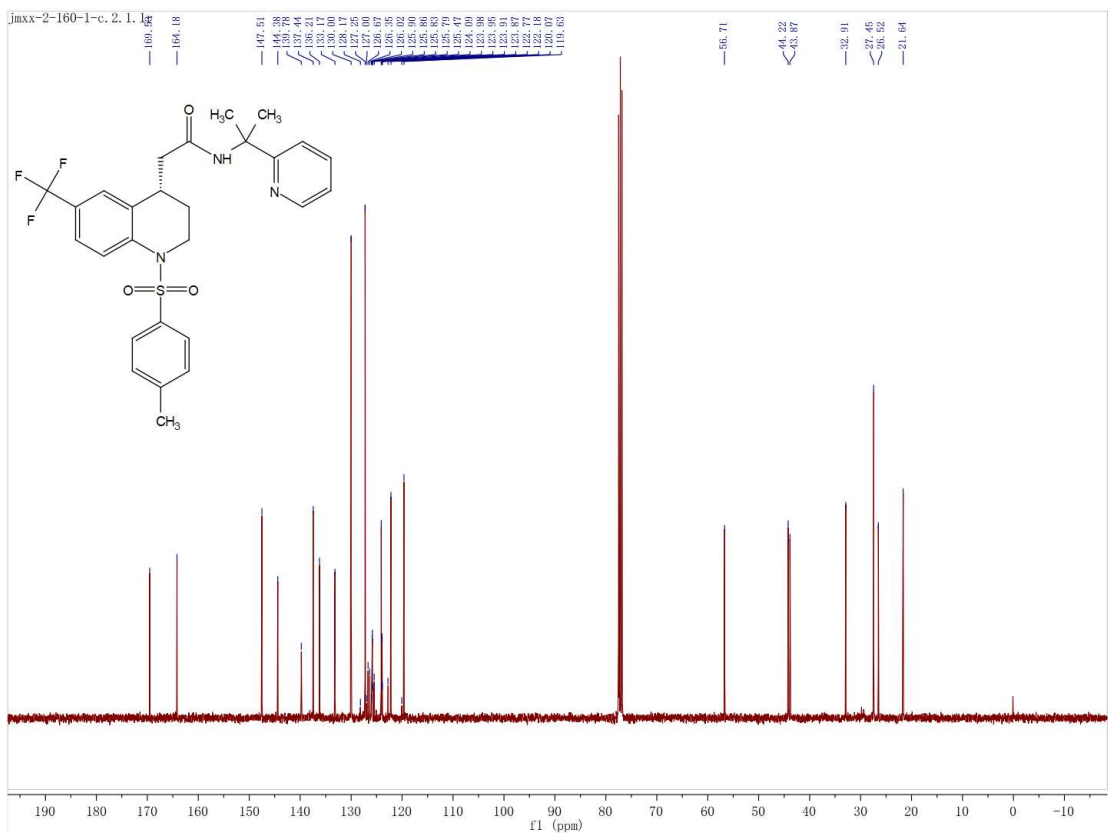

**2r,  $^{19}\text{F}$  NMR, 376 MHz,  $\text{CDCl}_3$**

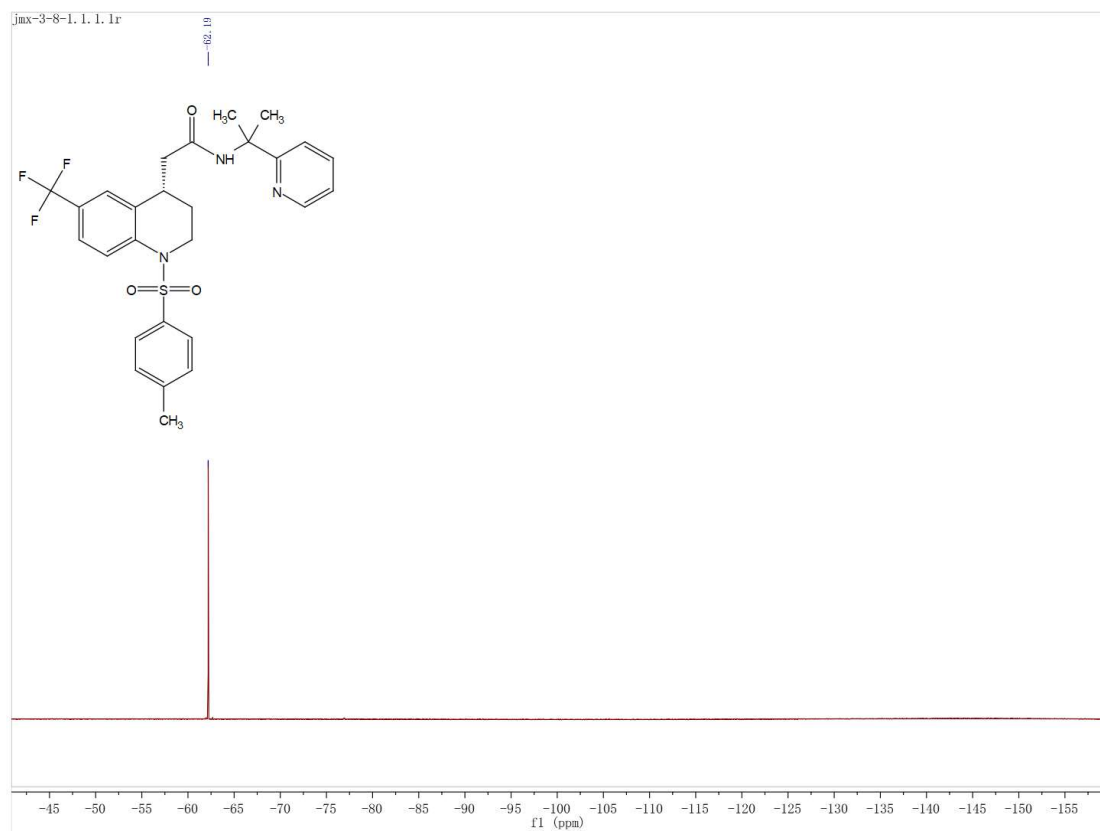

2s, <sup>1</sup>H NMR, 400 MHz, CDCl<sub>3</sub>

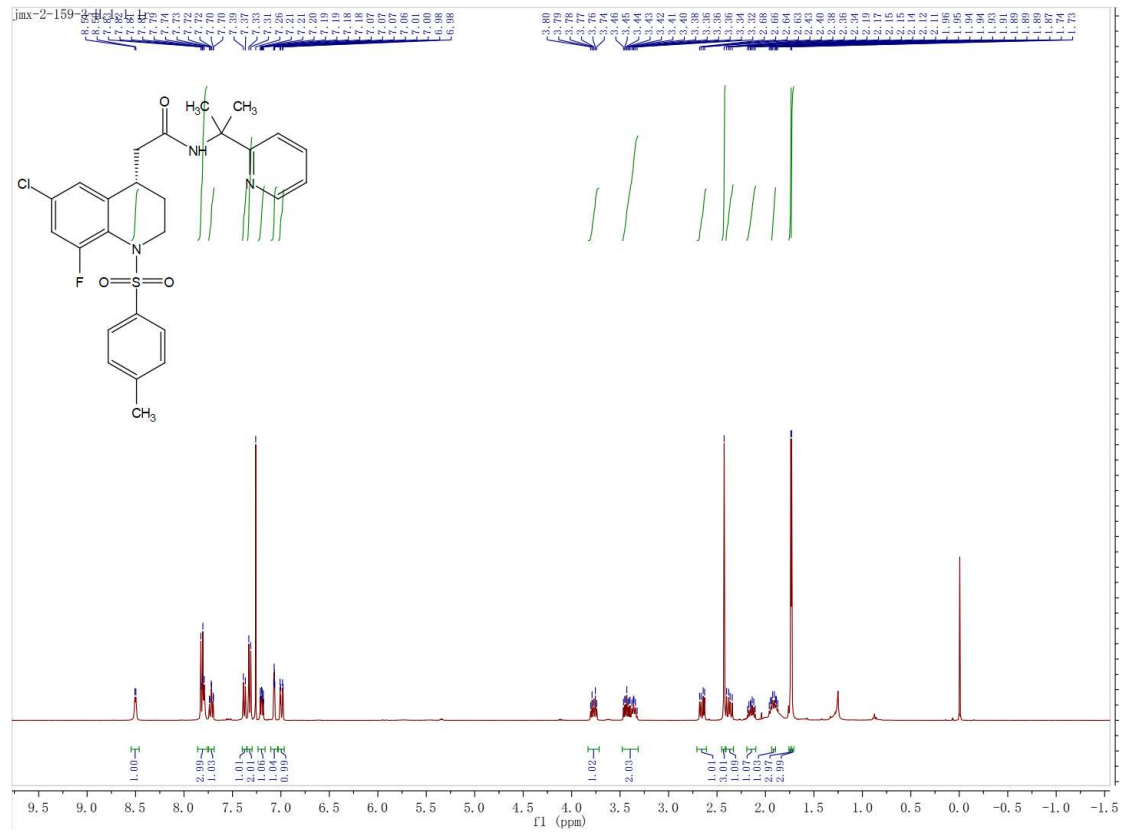

2s, <sup>13</sup>C NMR, 101 MHz, CDCl<sub>3</sub>

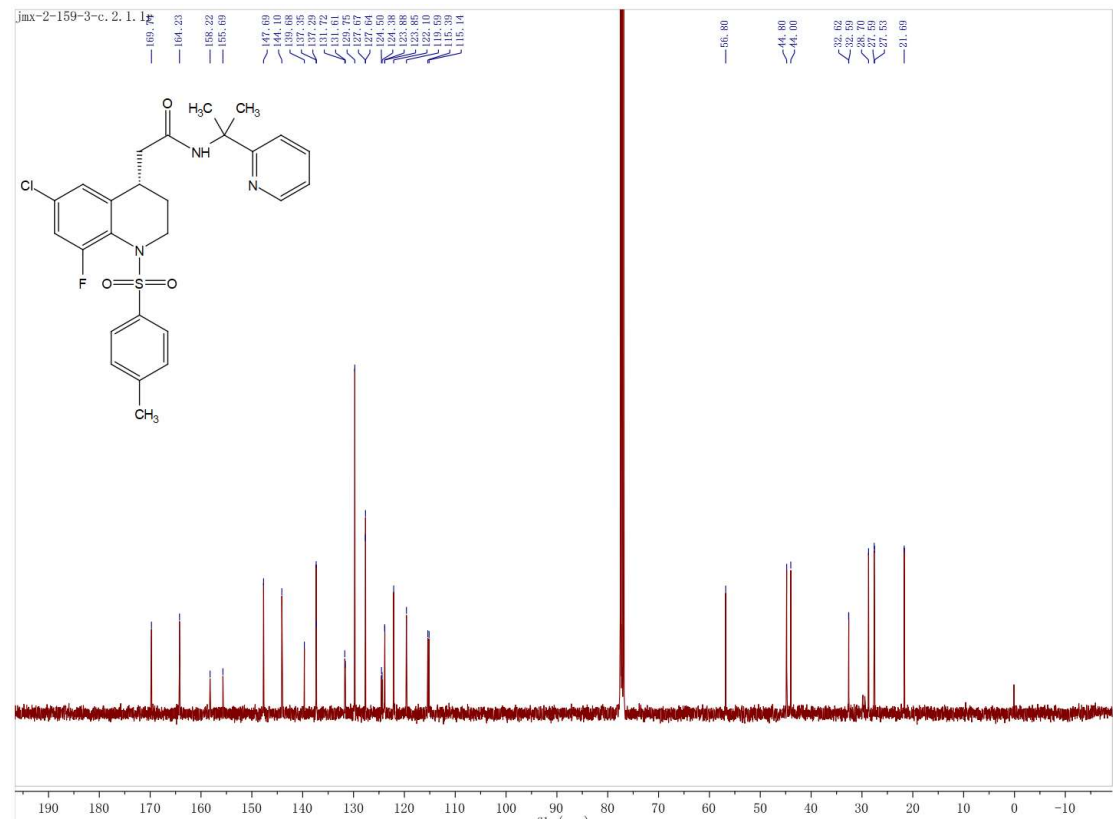

2s,  $^{19}\text{F}$  NMR, 376 MHz,  $\text{CDCl}_3$

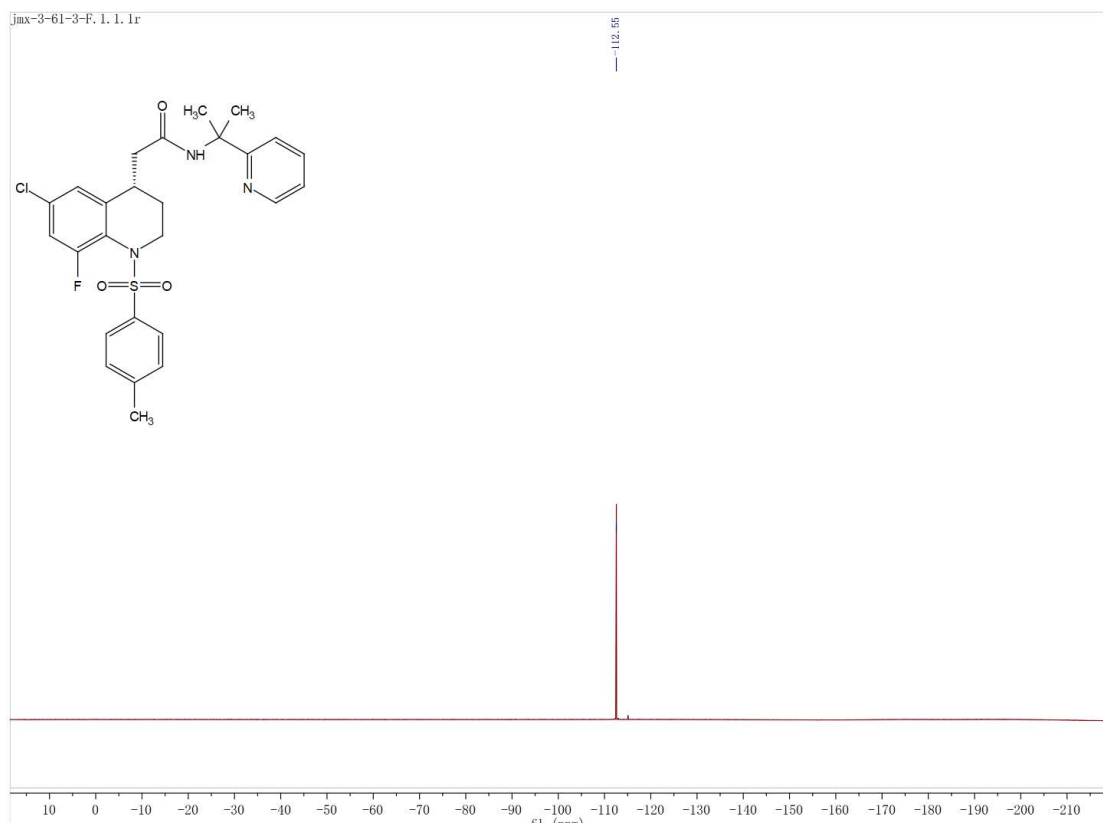

3a, <sup>1</sup>H NMR, 400 MHz, CDCl<sub>3</sub>

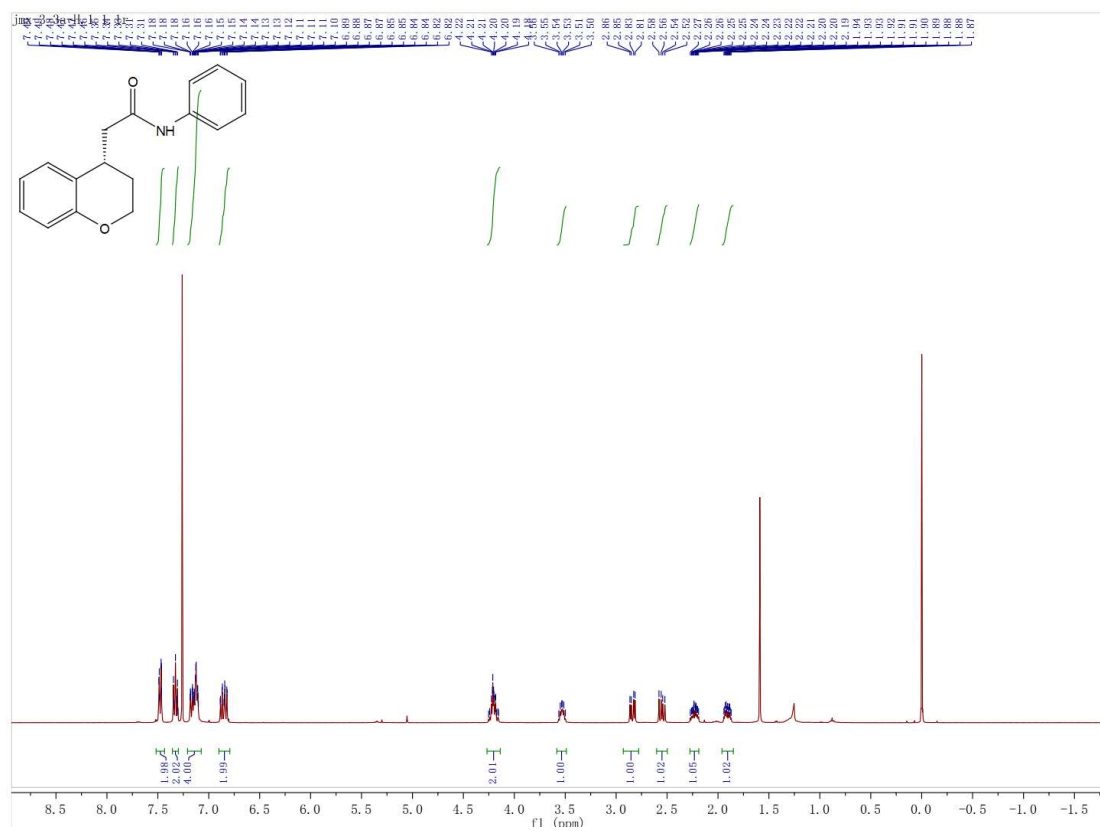

**3b, <sup>1</sup>H NMR, 400 MHz, CDCl<sub>3</sub>**

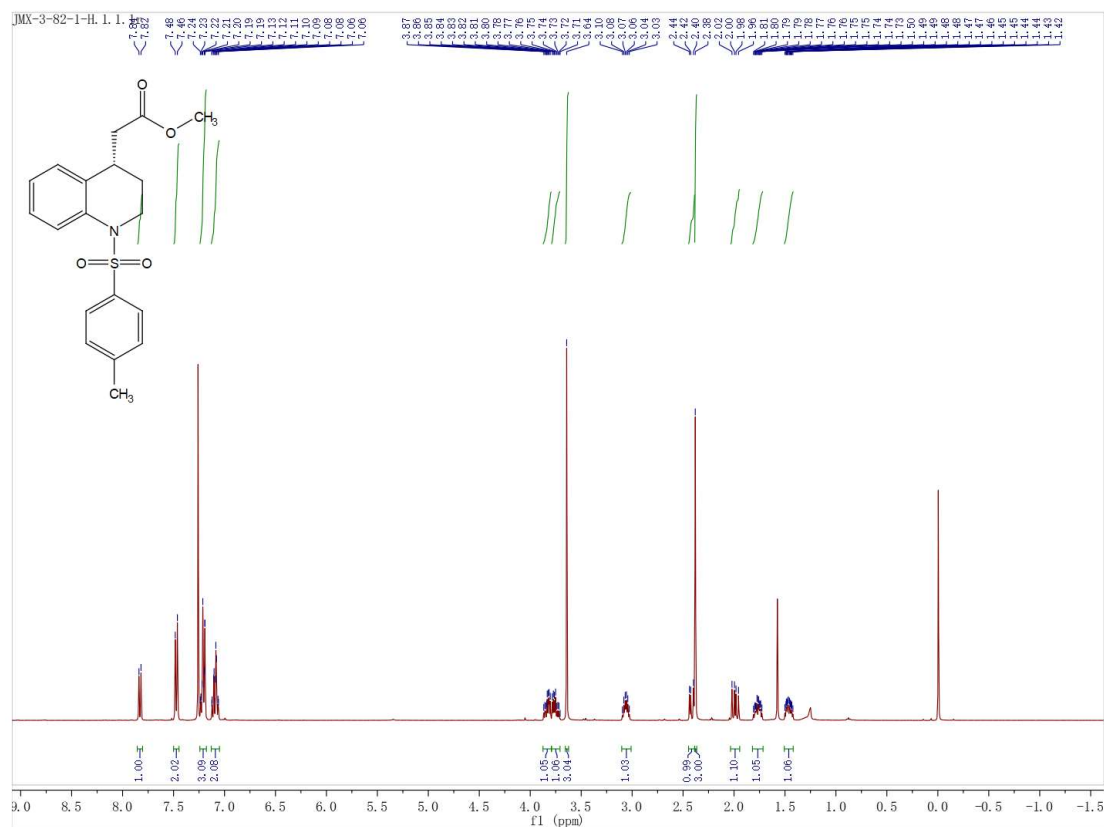

**3b, <sup>13</sup>C NMR, 101 MHz, CDCl<sub>3</sub>**

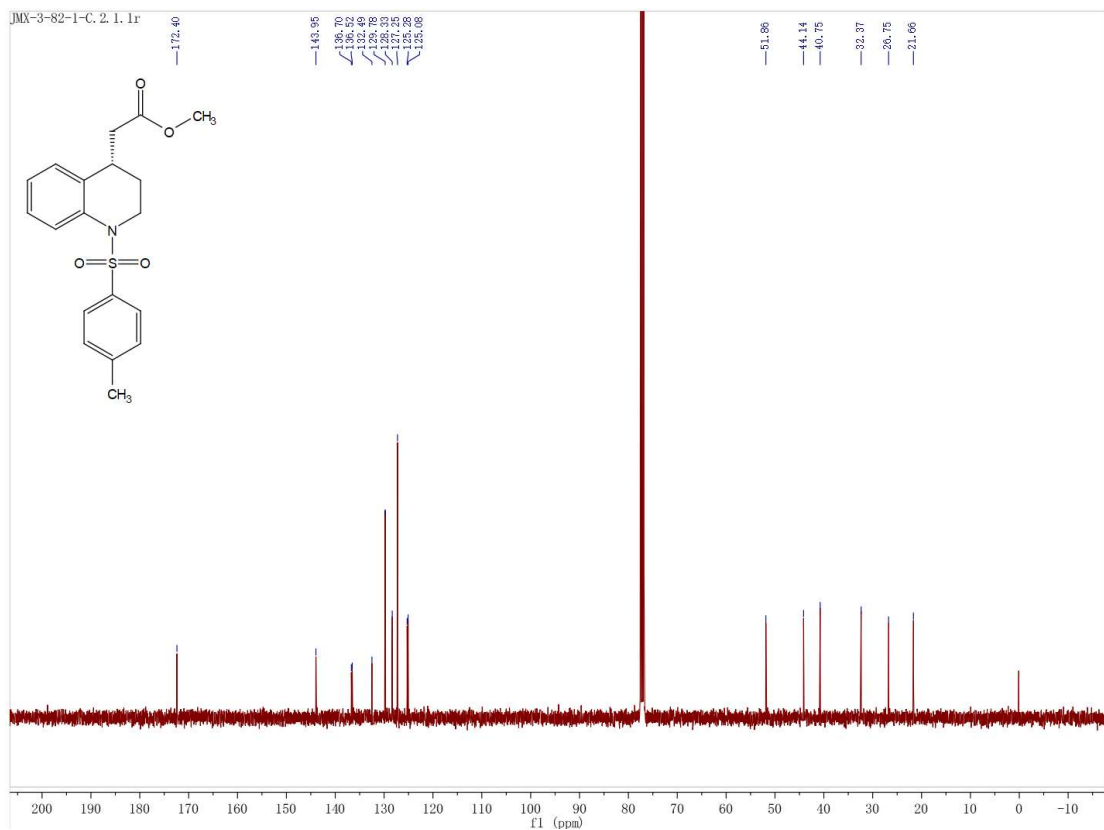

**3c, <sup>1</sup>H NMR, 400 MHz, CDCl<sub>3</sub>**

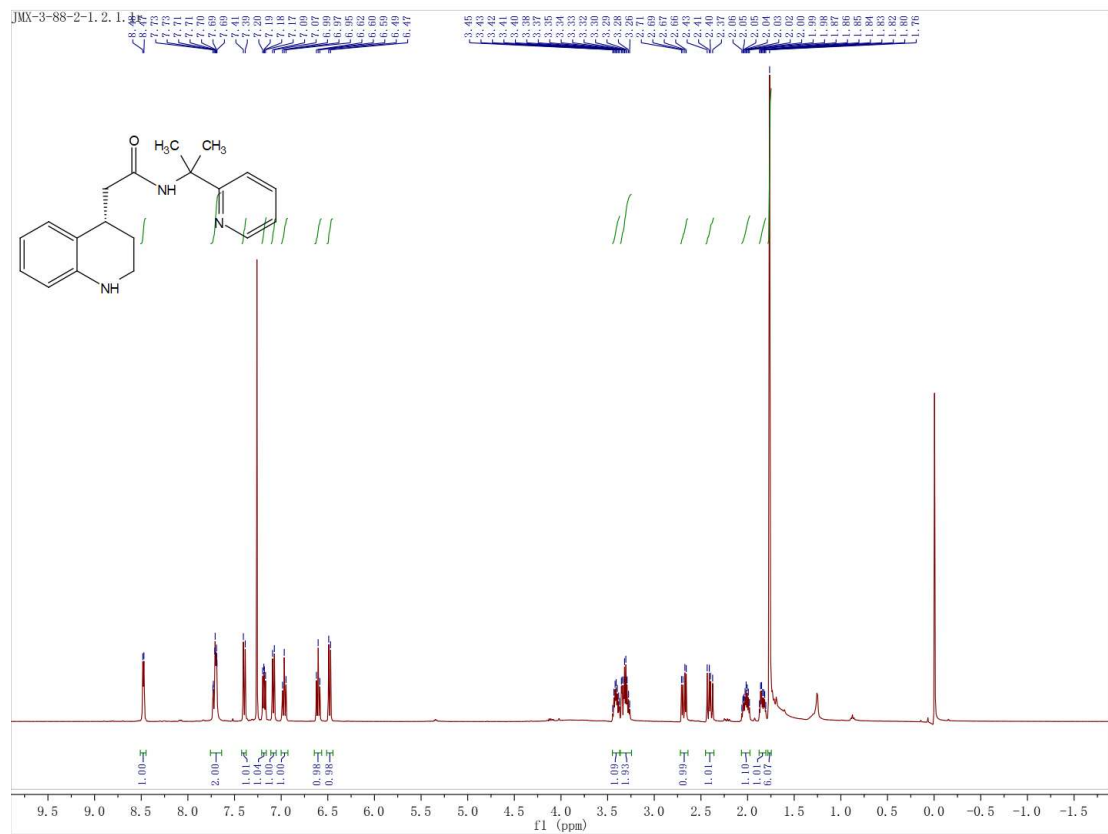

**3c, <sup>13</sup>C NMR, 101 MHz, CDCl<sub>3</sub>**

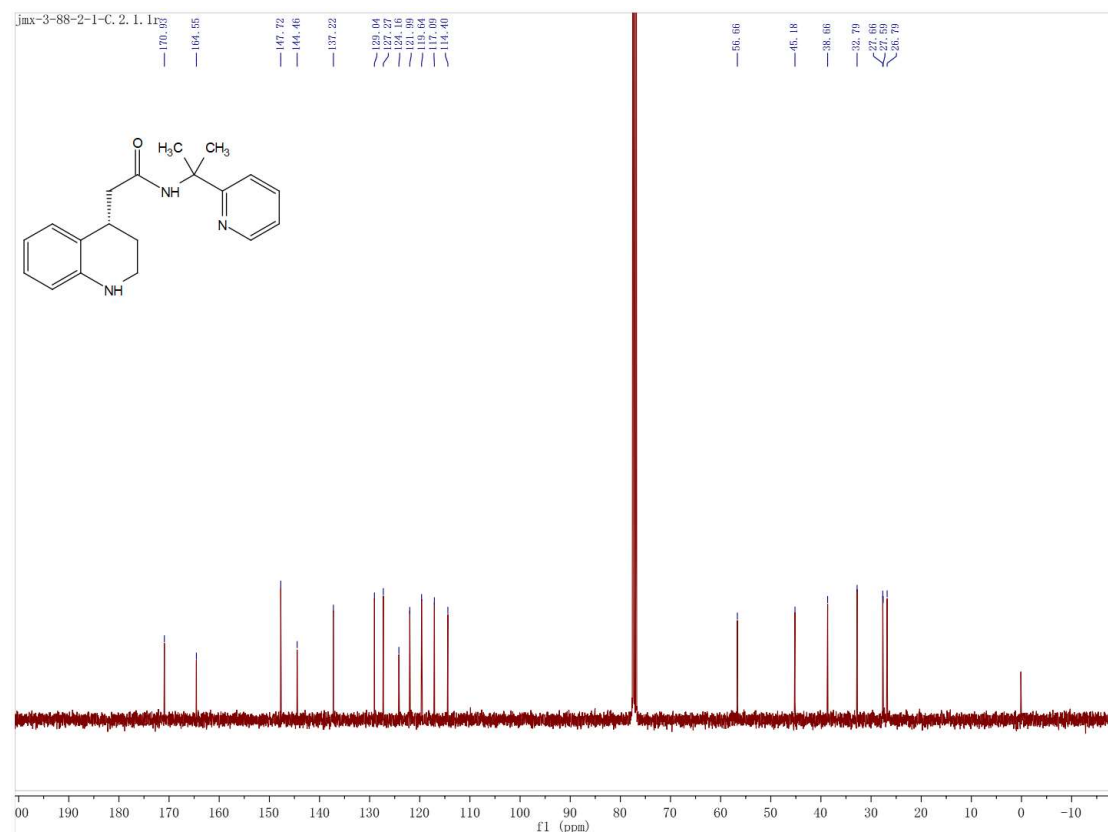



## 7. HPLC Charts

2a: OD-H, Hexane/iPrOH=85/15, rate=0.8 mL/min, 254 nm

### <Chromatogram>

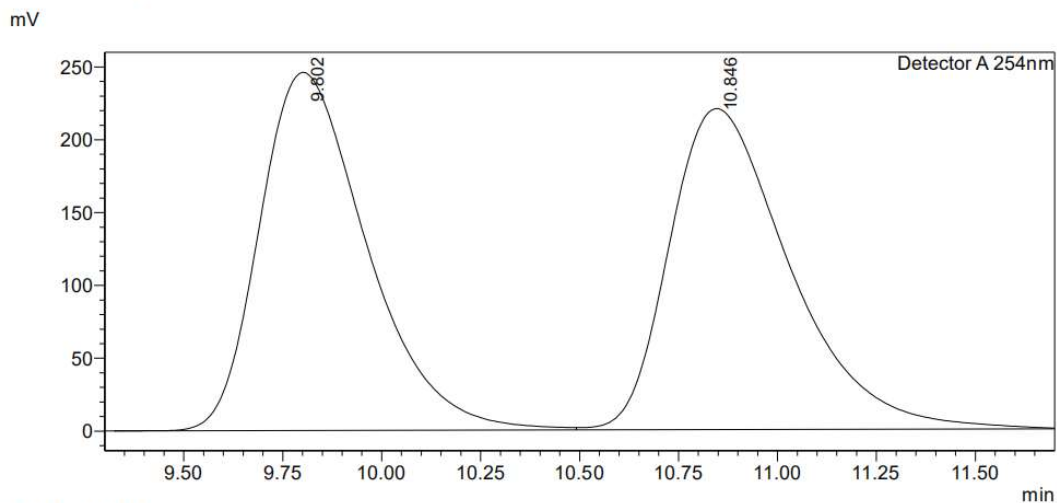

### <Peak Table>

Detector A 254nm

| Peak# | Ret. Time | Area    | Height | Conc.  | Unit | Mark | Name |
|-------|-----------|---------|--------|--------|------|------|------|
| 1     | 9.802     | 4635578 | 245886 | 49.808 |      | M    |      |
| 2     | 10.846    | 4671256 | 220393 | 50.192 |      | V M  |      |
| Total |           | 9306834 | 466279 |        |      |      |      |

### <Chromatogram>

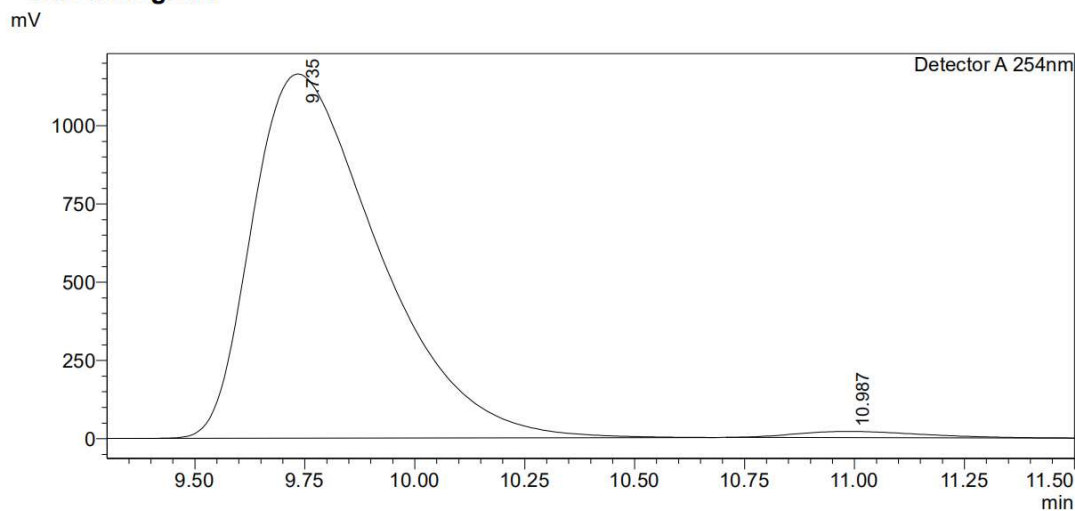

### <Peak Table>

Detector A 254nm

| Peak# | Ret. Time | Area     | Height  | Conc.  | Unit | Mark | Name |
|-------|-----------|----------|---------|--------|------|------|------|
| 1     | 9.735     | 23244619 | 1163315 | 98.305 |      | M    |      |
| 2     | 10.987    | 400781   | 20092   | 1.695  |      | M    |      |
| Total |           | 23645401 | 1183408 |        |      |      |      |

2b: OD-H, Hexane/iPrOH=80/20, rate=1.0 mL/min, 254 nm

<Chromatogram>

mV

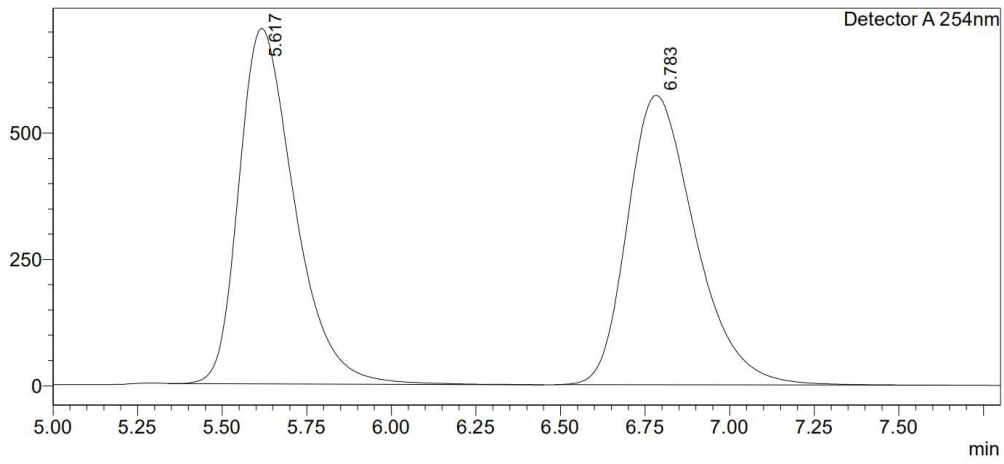

<Peak Table>

Detector A 254nm

| Peak# | Ret. Time | Area     | Height  | Conc.  | Unit | Mark | Name |
|-------|-----------|----------|---------|--------|------|------|------|
| 1     | 5.617     | 8045590  | 703505  | 50.144 |      | M    |      |
| 2     | 6.783     | 7999431  | 573059  | 49.856 |      | M    |      |
| Total |           | 16045020 | 1276564 |        |      |      |      |

<Chromatogram>

mV

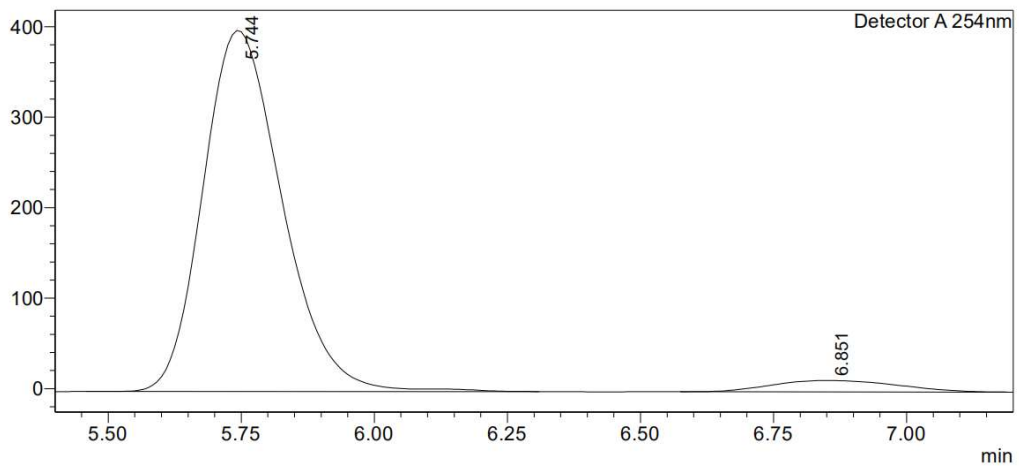

<Peak Table>

Detector A 254nm

| Peak# | Ret. Time | Area    | Height | Conc.  | Unit | Mark | Name |
|-------|-----------|---------|--------|--------|------|------|------|
| 1     | 5.744     | 4132806 | 398903 | 95.206 |      | M    |      |
| 2     | 6.851     | 208091  | 12631  | 4.794  |      | M    |      |
| Total |           | 4340897 | 411534 |        |      |      |      |

2c: AS-H, Hexane/iPrOH=80/20, rate=1.0 mL/min, 254 nm

<Chromatogram>

mV

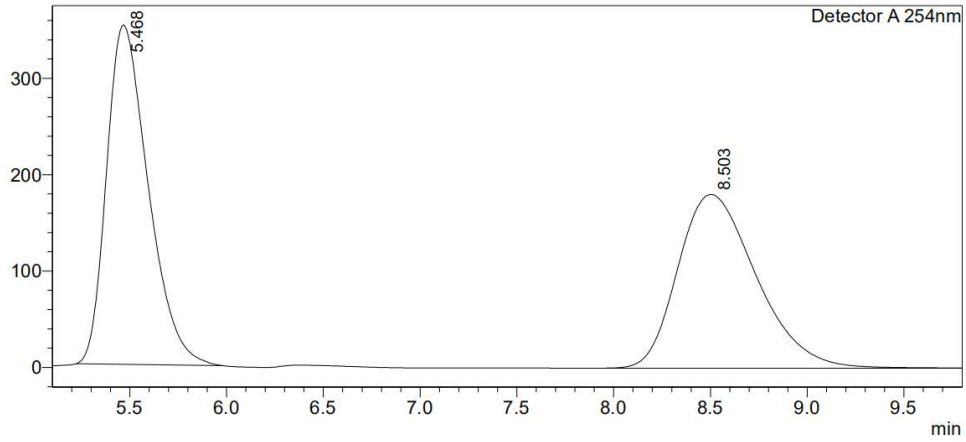

<Peak Table>

Detector A 254nm

| Peak# | Ret. Time | Area     | Height | Conc.  | Unit | Mark | Name |
|-------|-----------|----------|--------|--------|------|------|------|
| 1     | 5.468     | 5275201  | 352175 | 50.893 |      | M    |      |
| 2     | 8.503     | 5090028  | 180164 | 49.107 |      | M    |      |
| Total |           | 10365230 | 532340 |        |      |      |      |

<Chromatogram>

mV

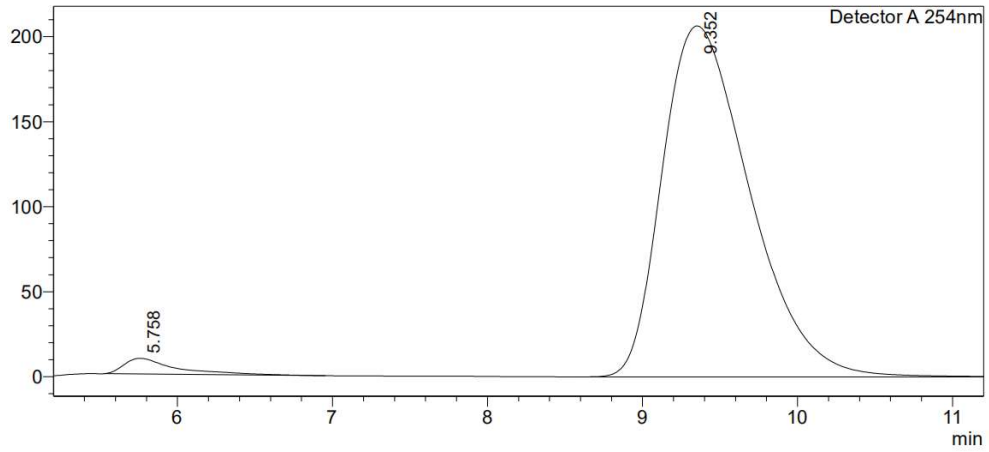

<Peak Table>

Detector A 254nm

| Peak# | Ret. Time | Area    | Height | Conc.  | Unit | Mark | Name |
|-------|-----------|---------|--------|--------|------|------|------|
| 1     | 5.758     | 215721  | 9213   | 2.589  |      | M    |      |
| 2     | 9.352     | 8115734 | 206430 | 97.411 |      | M    |      |
| Total |           | 8331455 | 215642 |        |      |      |      |

2d: OD-H, Hexane/iPrOH=85/15, rate=1.0 mL/min, 254 nm

<Chromatogram>

mV

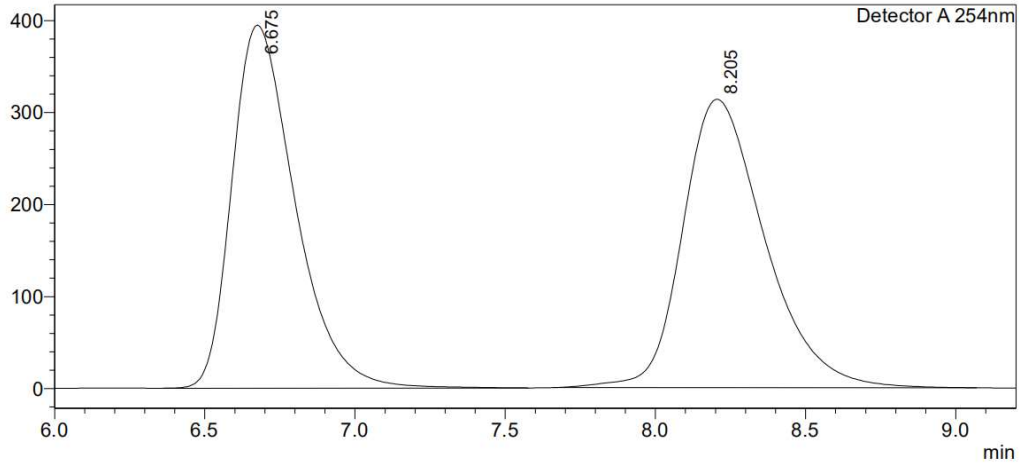

<Peak Table>

Detector A 254nm

| Peak# | Ret. Time | Area     | Height | Conc.  | Unit | Mark | Name |
|-------|-----------|----------|--------|--------|------|------|------|
| 1     | 6.675     | 5772260  | 394598 | 49.117 |      | M    |      |
| 2     | 8.205     | 5979837  | 313468 | 50.883 |      | M    |      |
| Total |           | 11752097 | 708066 |        |      |      |      |

<Chromatogram>

mV

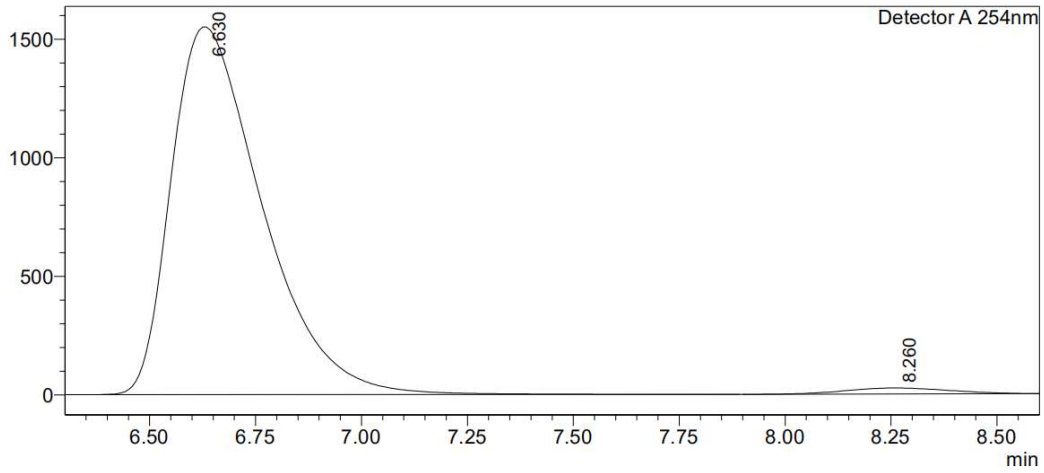

<Peak Table>

Detector A 254nm

| Peak# | Ret. Time | Area     | Height  | Conc.  | Unit | Mark | Name |
|-------|-----------|----------|---------|--------|------|------|------|
| 1     | 6.630     | 23154648 | 1550086 | 98.110 |      | M    |      |
| 2     | 8.260     | 446049   | 25573   | 1.890  |      | M    |      |
| Total |           | 23600697 | 1575659 |        |      |      |      |

2e: AS-H, Hexane/iPrOH=70/30, rate=1.0 mL/min, 254 nm

<Chromatogram>

mV

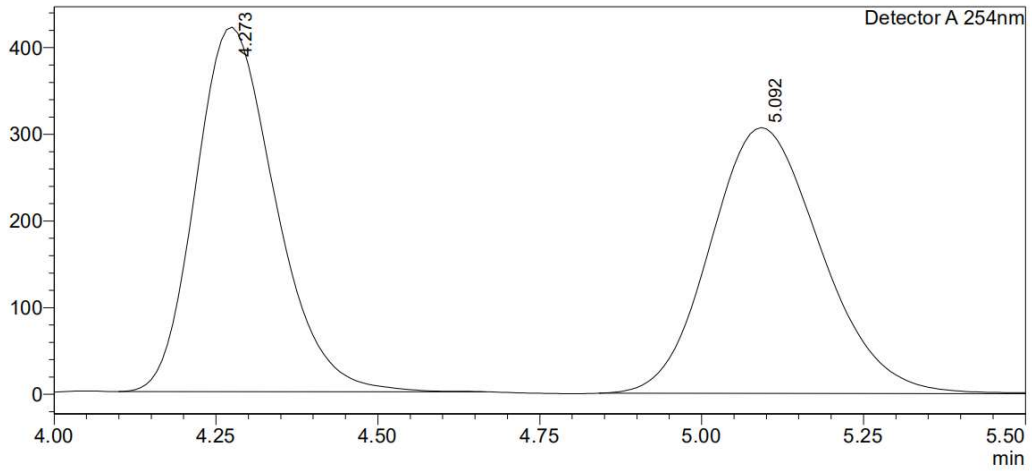

<Peak Table>

Detector A 254nm

| Peak# | Ret. Time | Area    | Height | Conc.  | Unit | Mark | Name |
|-------|-----------|---------|--------|--------|------|------|------|
| 1     | 4.273     | 3607322 | 420396 | 49.626 |      | M    |      |
| 2     | 5.092     | 3661712 | 306637 | 50.374 |      | M    |      |
| Total |           | 7269034 | 727033 |        |      |      |      |

<Chromatogram>

mV

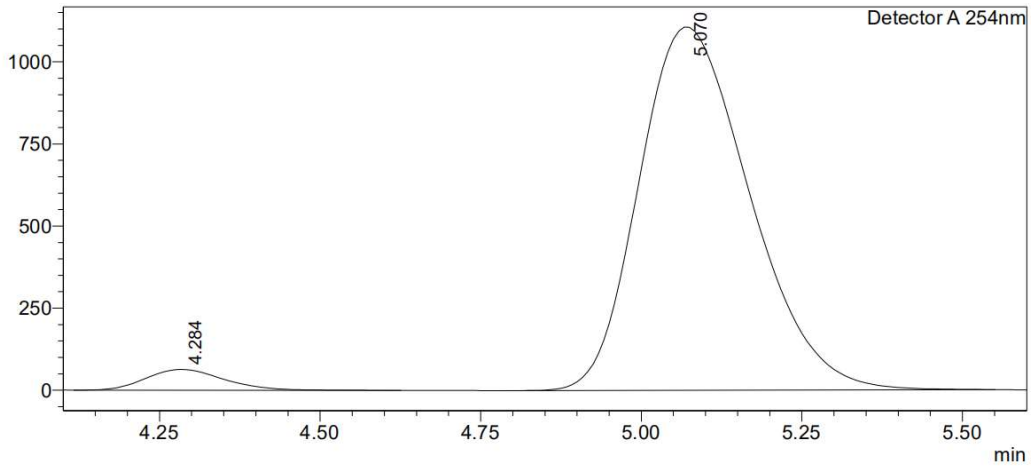

<Peak Table>

Detector A 254nm

| Peak# | Ret. Time | Area     | Height  | Conc.  | Unit | Mark | Name |
|-------|-----------|----------|---------|--------|------|------|------|
| 1     | 4.284     | 530960   | 63288   | 3.857  |      | M    |      |
| 2     | 5.070     | 13234591 | 1105457 | 96.143 |      | M    |      |
| Total |           | 13765551 | 1168745 |        |      |      |      |

2f: IA, Hexane/iPrOH=80/20, rate=1.0 mL/min, 254 nm

<Chromatogram>

mV

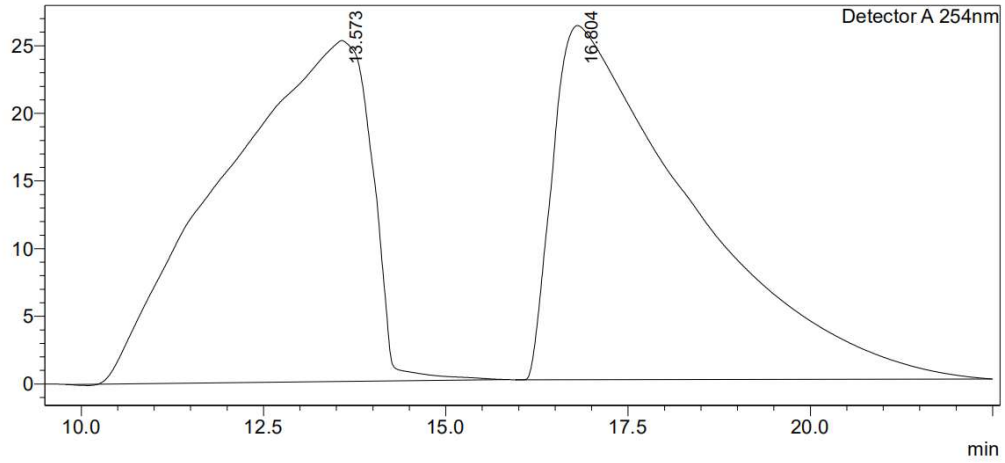

<Peak Table>

Detector A 254nm

| Peak# | Ret. Time | Area    | Height | Conc.  | Unit | Mark | Name |
|-------|-----------|---------|--------|--------|------|------|------|
| 1     | 13.573    | 3553552 | 25201  | 50.595 |      | M    |      |
| 2     | 16.804    | 3469968 | 26175  | 49.405 |      | M    |      |
| Total |           | 7023520 | 51375  |        |      |      |      |

<Chromatogram>

mV

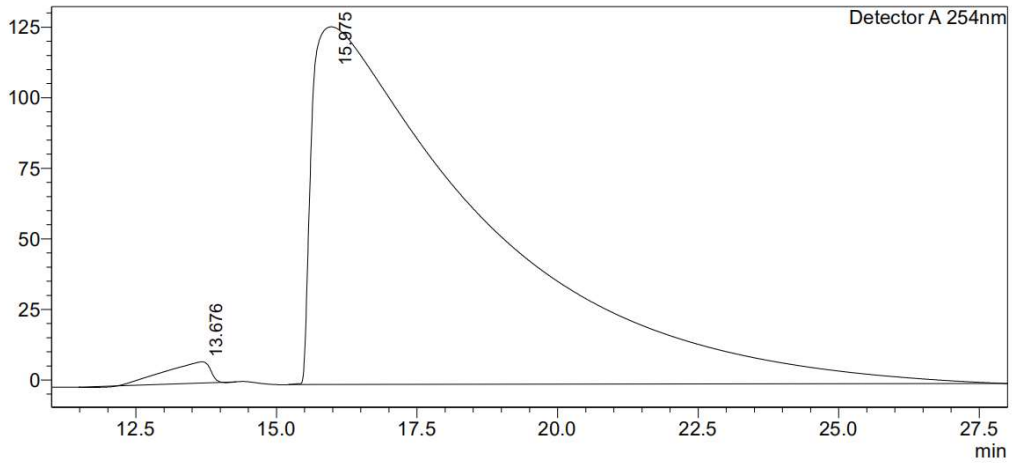

<Peak Table>

Detector A 254nm

| Peak# | Ret. Time | Area     | Height | Conc.  | Unit | Mark | Name |
|-------|-----------|----------|--------|--------|------|------|------|
| 1     | 13.676    | 424821   | 7525   | 1.558  |      | M    |      |
| 2     | 15.975    | 26849532 | 126747 | 98.442 |      | M    |      |
| Total |           | 27274353 | 134272 |        |      |      |      |

2g: AS-H, Hexane/iPrOH=80/20, rate=1.0 mL/min, 254 nm

<Chromatogram>

mV

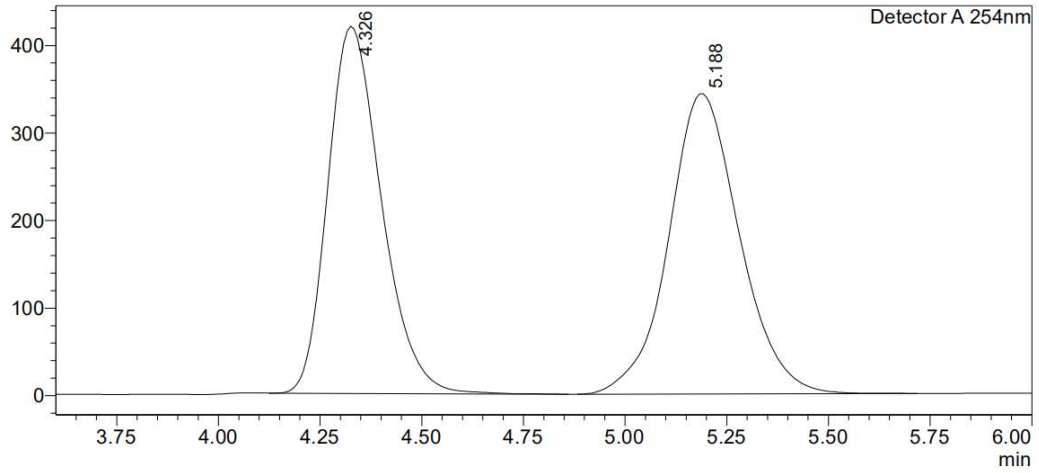

<Peak Table>

Detector A 254nm

| Peak# | Ret. Time | Area    | Height | Conc.  | Unit | Mark | Name |
|-------|-----------|---------|--------|--------|------|------|------|
| 1     | 4.326     | 3849669 | 419447 | 48.087 |      | M    |      |
| 2     | 5.188     | 4155955 | 342921 | 51.913 |      | M    |      |
| Total |           | 8005623 | 762368 |        |      |      |      |

<Chromatogram>

mV

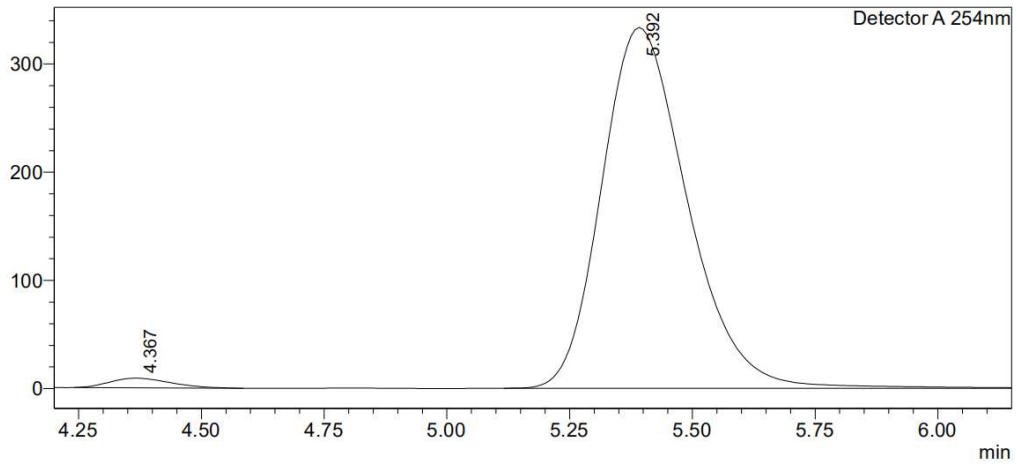

<Peak Table>

Detector A 254nm

| Peak# | Ret. Time | Area    | Height | Conc.  | Unit | Mark | Name |
|-------|-----------|---------|--------|--------|------|------|------|
| 1     | 4.367     | 76503   | 8926   | 1.850  |      | M    |      |
| 2     | 5.392     | 4059505 | 333439 | 98.150 |      | M    |      |
| Total |           | 4136007 | 342365 |        |      |      |      |

2h: AS-H, Hexane/iPrOH=70/30, rate=0.8 mL/min, 254 nm

<Chromatogram>

mV

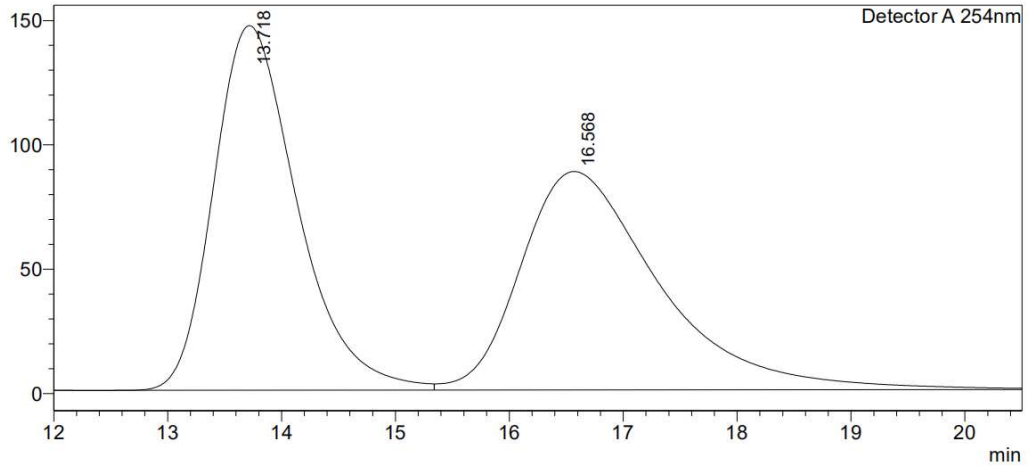

<Peak Table>

Detector A 254nm

| Peak# | Ret. Time | Area     | Height | Conc.  | Unit | Mark | Name |
|-------|-----------|----------|--------|--------|------|------|------|
| 1     | 13.718    | 7497360  | 146640 | 50.106 |      | M    |      |
| 2     | 16.568    | 7465685  | 87816  | 49.894 |      | V M  |      |
| Total |           | 14963045 | 234456 |        |      |      |      |

<Chromatogram>

mV

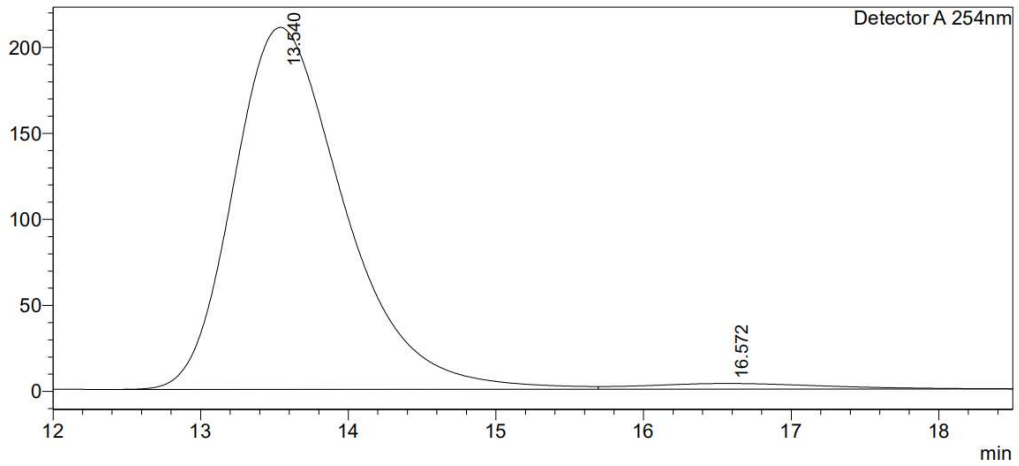

<Peak Table>

Detector A 254nm

| Peak# | Ret. Time | Area     | Height | Conc.  | Unit | Mark | Name |
|-------|-----------|----------|--------|--------|------|------|------|
| 1     | 13.540    | 10988172 | 210450 | 97.549 |      | M    |      |
| 2     | 16.572    | 276035   | 3260   | 2.451  |      | V M  |      |
| Total |           | 11264206 | 213710 |        |      |      |      |



2i: AD-H, Hexane/iPrOH=80/20, rate=1.0 mL/min, 254 nm

<Chromatogram>

mV

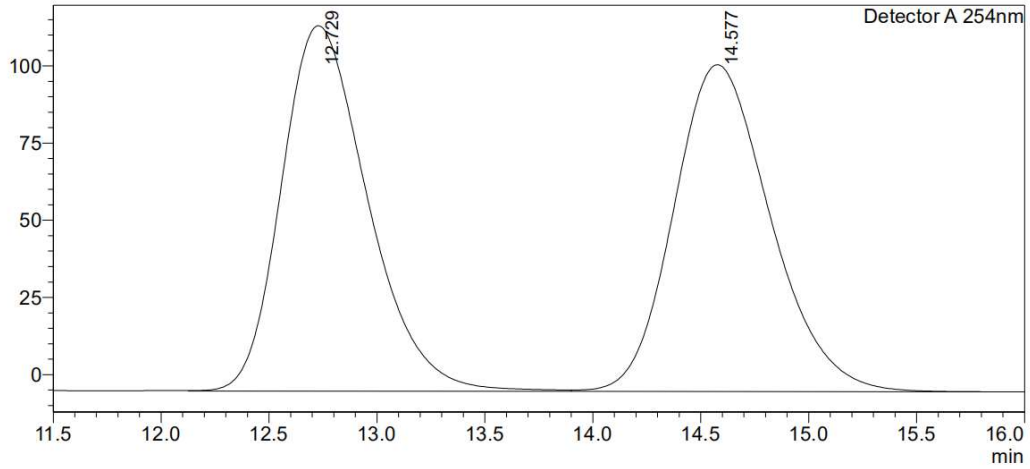

<Peak Table>

Detector A 254nm

| Peak# | Ret. Time | Area    | Height | Conc.  | Unit | Mark | Name |
|-------|-----------|---------|--------|--------|------|------|------|
| 1     | 12.729    | 3292447 | 118369 | 49.959 |      |      |      |
| 2     | 14.577    | 3297909 | 105856 | 50.041 |      | V    |      |
| Total |           | 6590357 | 224225 |        |      |      |      |

<Chromatogram>

mV

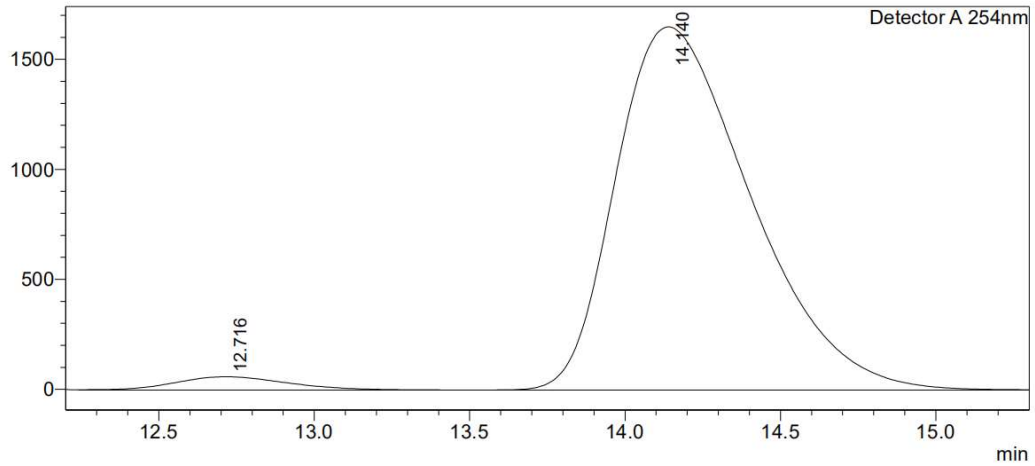

<Peak Table>

Detector A 254nm

| Peak# | Ret. Time | Area     | Height  | Conc.  | Unit | Mark | Name |
|-------|-----------|----------|---------|--------|------|------|------|
| 1     | 12.716    | 1522478  | 60237   | 2.963  |      |      |      |
| 2     | 14.140    | 49852042 | 1650780 | 97.037 |      | V    |      |
| Total |           | 51374521 | 1711017 |        |      |      |      |

2j: OD-H, Hexane/iPrOH=85/15, rate=0.8 mL/min, 254 nm

<Chromatogram>

mV

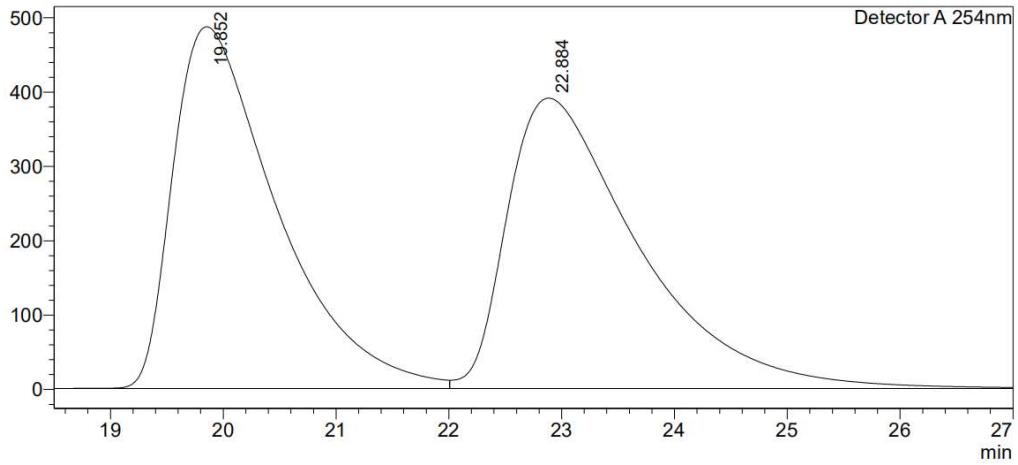

<Peak Table>

Detector A 254nm

| Peak# | Ret. Time | Area     | Height | Conc.  | Unit | Mark | Name |
|-------|-----------|----------|--------|--------|------|------|------|
| 1     | 19.852    | 31214464 | 486566 | 49.512 |      | M    |      |
| 2     | 22.884    | 31830296 | 390583 | 50.488 |      | V M  |      |
| Total |           | 63044760 | 877149 |        |      |      |      |

<Chromatogram>

mV

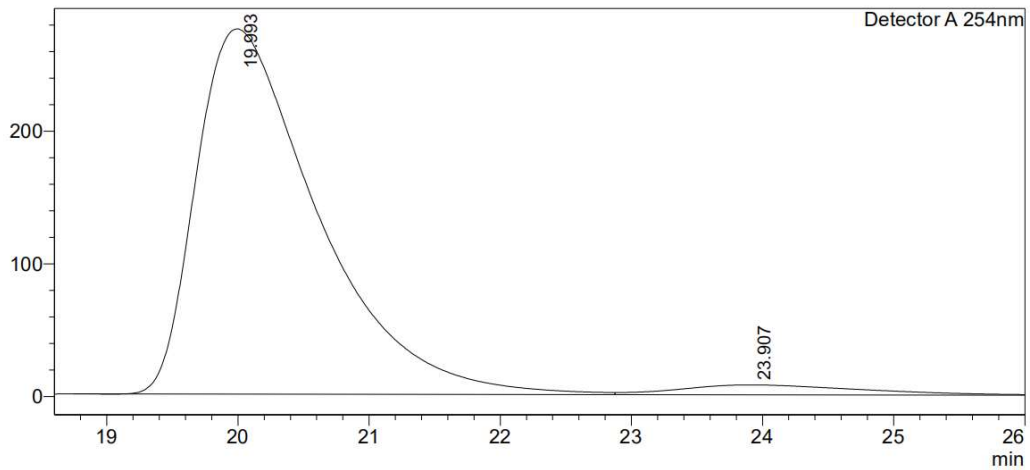

<Peak Table>

Detector A 254nm

| Peak# | Ret. Time | Area     | Height | Conc.  | Unit | Mark | Name |
|-------|-----------|----------|--------|--------|------|------|------|
| 1     | 19.993    | 17793700 | 275316 | 96.111 |      | M    |      |
| 2     | 23.907    | 719922   | 7445   | 3.889  |      | V M  |      |
| Total |           | 18513622 | 282761 |        |      |      |      |

2k: AD-H, Hexane/iPrOH=80/20, rate=1.0 mL/min, 254 nm

<Chromatogram>

mV

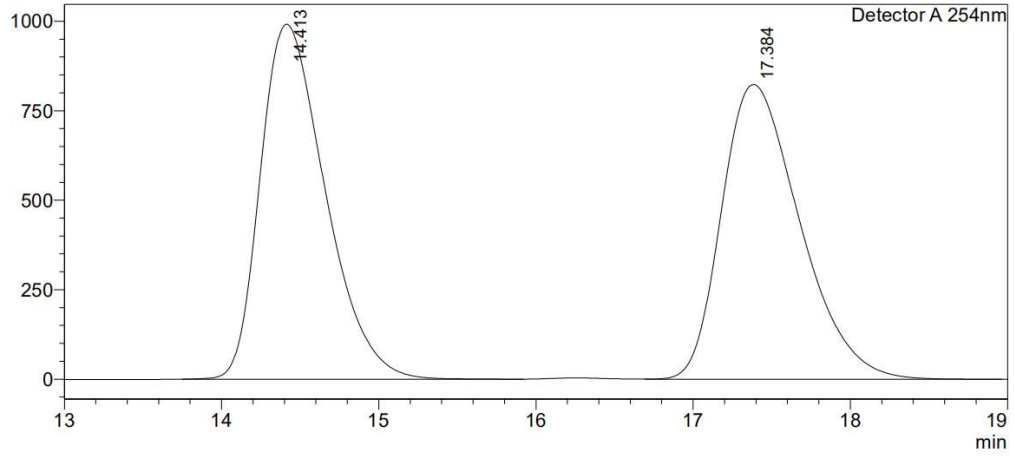

<Peak Table>

Detector A 254nm

| Peak# | Ret. Time | Area     | Height  | Conc.  | Unit | Mark | Name |
|-------|-----------|----------|---------|--------|------|------|------|
| 1     | 14.413    | 28521930 | 991908  | 50.025 |      | M    |      |
| 2     | 17.384    | 28493268 | 823796  | 49.975 |      |      |      |
| Total |           | 57015198 | 1815703 |        |      |      |      |

<Chromatogram>

mV

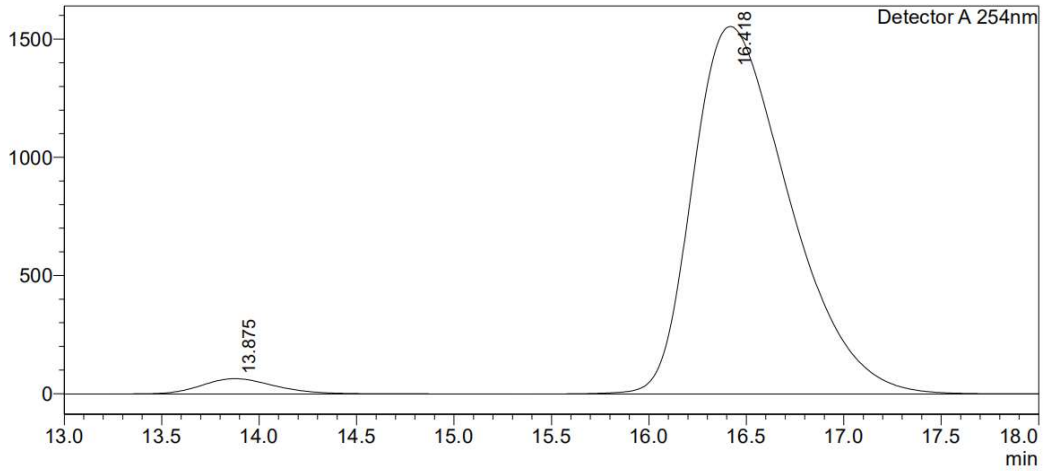

<Peak Table>

Detector A 254nm

| Peak# | Ret. Time | Area     | Height  | Conc.  | Unit | Mark | Name |
|-------|-----------|----------|---------|--------|------|------|------|
| 1     | 13.875    | 1704957  | 64525   | 3.092  |      |      |      |
| 2     | 16.418    | 53432909 | 1554692 | 96.908 |      |      |      |
| Total |           | 55137866 | 1619217 |        |      |      |      |

2I: AD-H, Hexane/iPrOH=80/20, rate=1.0 mL/min, 254 nm

<Chromatogram>

mV

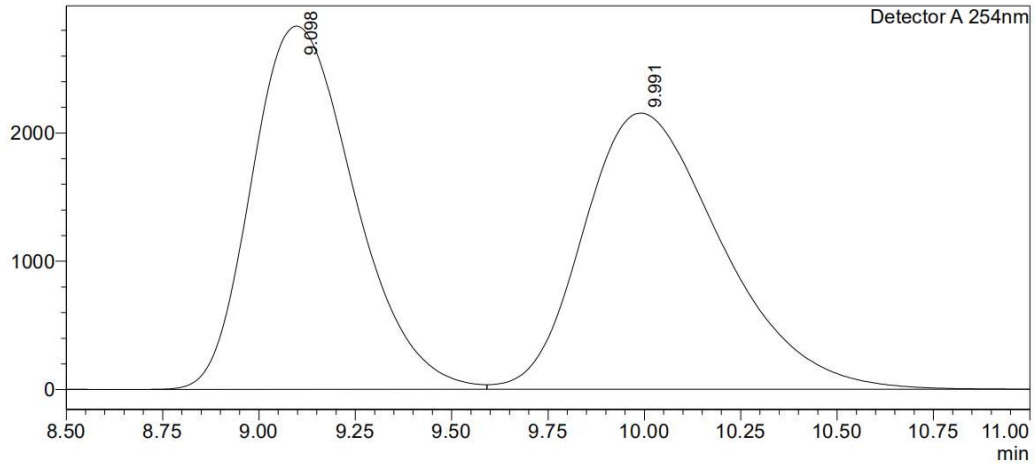

<Peak Table>

Detector A 254nm

| Peak# | Ret. Time | Area      | Height  | Conc.  | Unit | Mark | Name |
|-------|-----------|-----------|---------|--------|------|------|------|
| 1     | 9.098     | 52499001  | 2831021 | 49.442 |      | M    |      |
| 2     | 9.991     | 53682954  | 2153483 | 50.558 |      | V M  |      |
| Total |           | 106181954 | 4984504 |        |      |      |      |

<Chromatogram>

mV

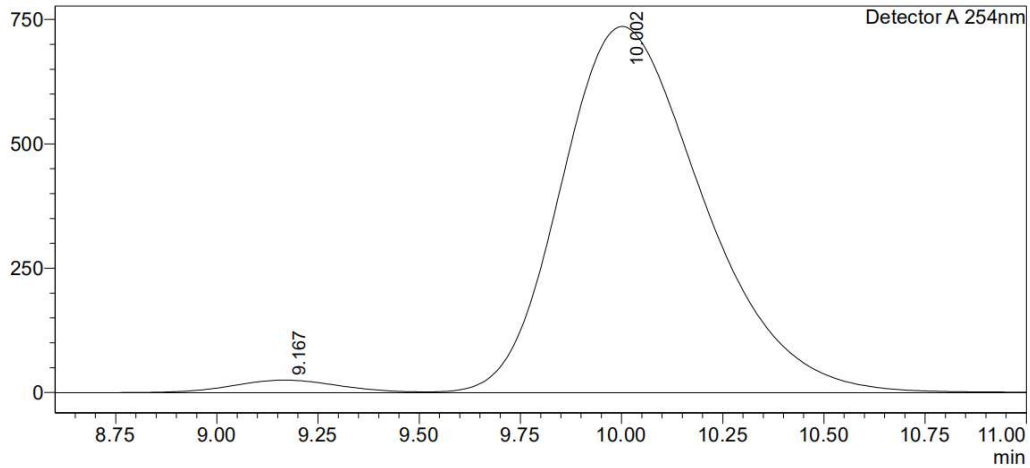

<Peak Table>

Detector A 254nm

| Peak# | Ret. Time | Area     | Height | Conc.  | Unit | Mark | Name |
|-------|-----------|----------|--------|--------|------|------|------|
| 1     | 9.167     | 467391   | 25238  | 2.533  |      | M    |      |
| 2     | 10.002    | 17984180 | 736060 | 97.467 |      | V M  |      |
| Total |           | 18451571 | 761298 |        |      |      |      |

2m: AS-H, Hexane/iPrOH=80/20, rate=1.0 mL/min, 254 nm

<Chromatogram>

mV

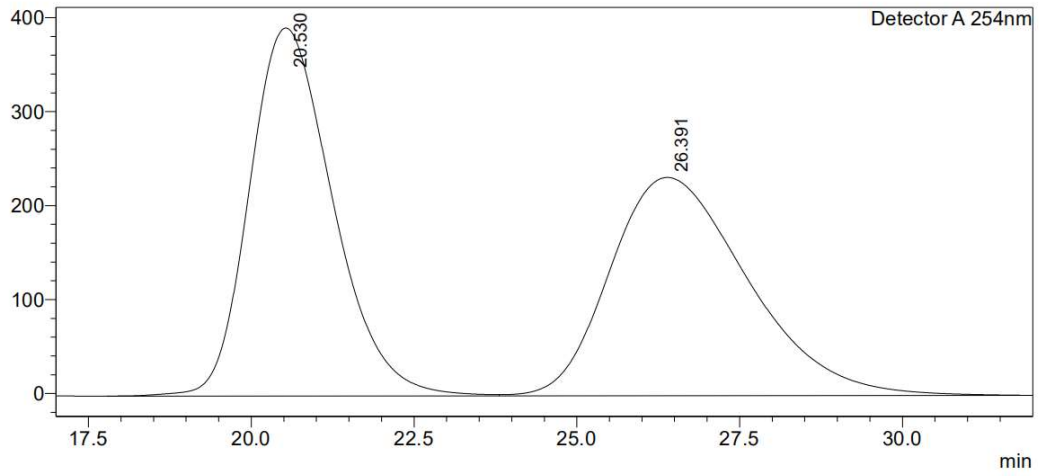

<Peak Table>

Detector A 254nm

| Peak# | Ret. Time | Area     | Height | Conc.  | Unit | Mark | Name |
|-------|-----------|----------|--------|--------|------|------|------|
| 1     | 20.530    | 34912050 | 391576 | 50.547 |      |      |      |
| 2     | 26.391    | 34155887 | 232212 | 49.453 |      | V    |      |
| Total |           | 69067937 | 623787 |        |      |      |      |

<Chromatogram>

mV

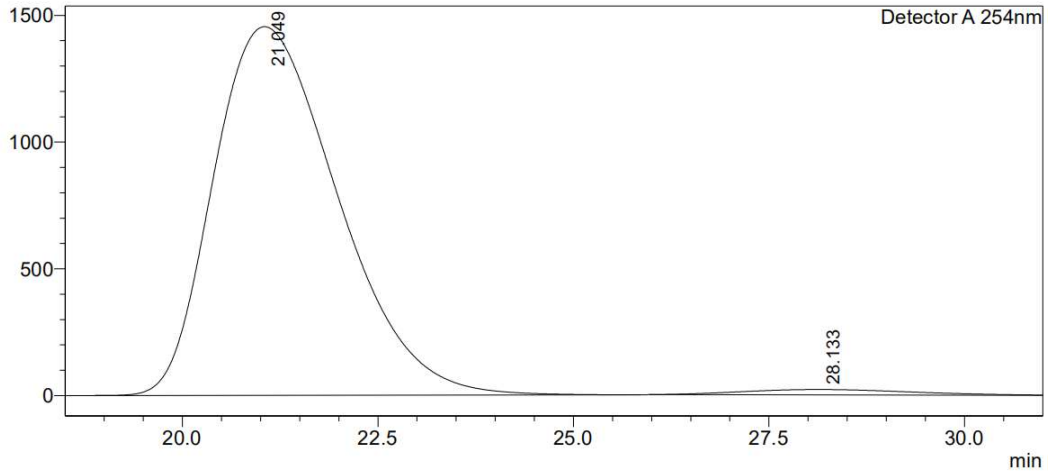

<Peak Table>

Detector A 254nm

| Peak# | Ret. Time | Area      | Height  | Conc.  | Unit | Mark | Name |
|-------|-----------|-----------|---------|--------|------|------|------|
| 1     | 21.049    | 160525786 | 1454202 | 97.997 |      | M    |      |
| 2     | 28.133    | 3281606   | 21597   | 2.003  |      | M    |      |
| Total |           | 163807392 | 1475799 |        |      |      |      |

2n: AD-H, Hexane/iPrOH=80/20, rate=1.0 mL/min, 254 nm

<Chromatogram>

mV

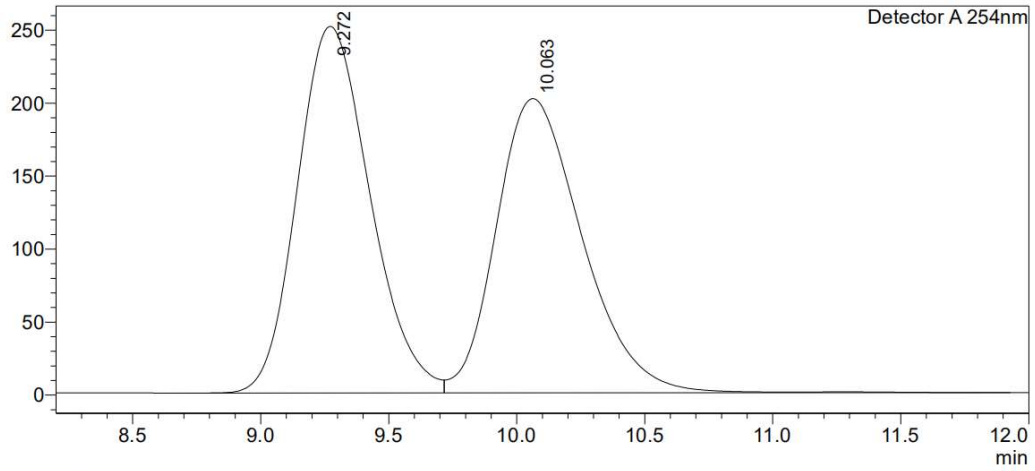

<Peak Table>

Detector A 254nm

| Peak# | Ret. Time | Area    | Height | Conc.  | Unit | Mark | Name |
|-------|-----------|---------|--------|--------|------|------|------|
| 1     | 9.272     | 4964583 | 251079 | 51.282 |      | M    |      |
| 2     | 10.063    | 4716364 | 201515 | 48.718 |      | V M  |      |
| Total |           | 9680947 | 452595 |        |      |      |      |

<Chromatogram>

mV

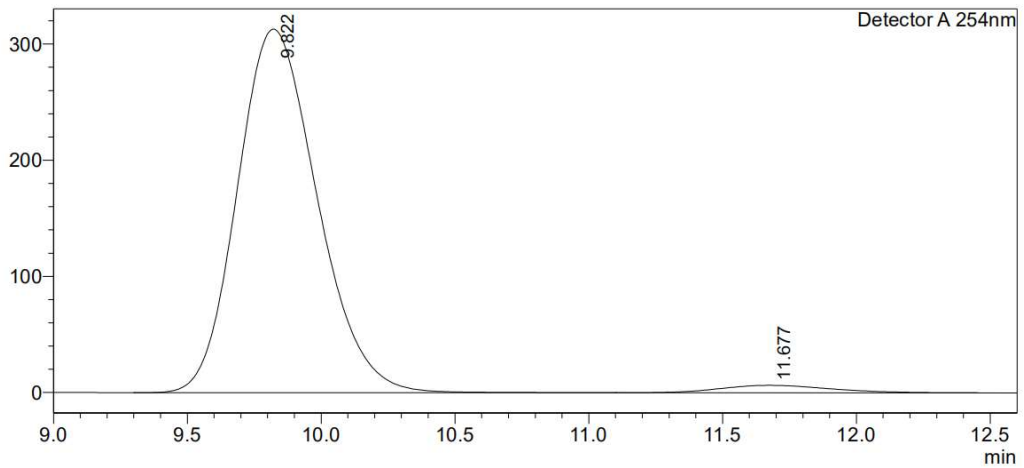

<Peak Table>

Detector A 254nm

| Peak# | Ret. Time | Area    | Height | Conc.  | Unit | Mark | Name |
|-------|-----------|---------|--------|--------|------|------|------|
| 1     | 9.822     | 6489931 | 313014 | 97.266 |      | M    |      |
| 2     | 11.677    | 182451  | 6388   | 2.734  |      | M    |      |
| Total |           | 6672382 | 319403 |        |      |      |      |

2o: OD-H, Hexane/iPrOH=80/20, rate=0.8 mL/min, 254 nm

<Chromatogram>

mV

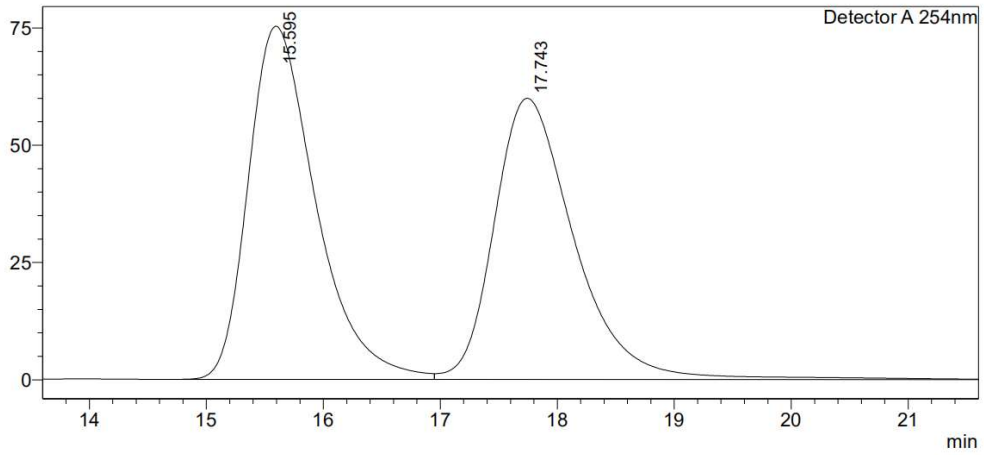

<Peak Table>

Detector A 254nm

| Peak# | Ret. Time | Area    | Height | Conc.  | Unit | Mark | Name |
|-------|-----------|---------|--------|--------|------|------|------|
| 1     | 15.595    | 3016593 | 75266  | 51.265 |      | M    |      |
| 2     | 17.743    | 2867762 | 59942  | 48.735 |      | V M  |      |
| Total |           | 5884355 | 135208 |        |      |      |      |

<Chromatogram>

mV

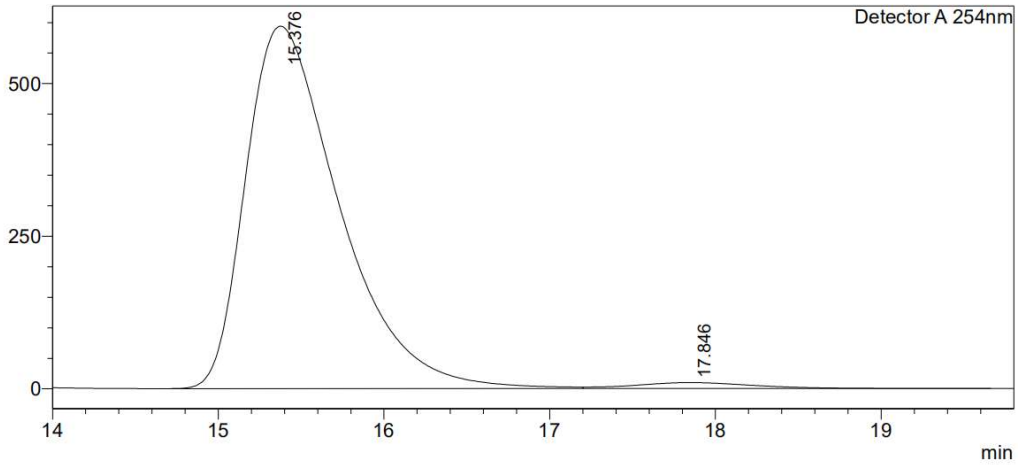

<Peak Table>

Detector A 254nm

| Peak# | Ret. Time | Area     | Height | Conc.  | Unit | Mark | Name |
|-------|-----------|----------|--------|--------|------|------|------|
| 1     | 15.376    | 23368805 | 593582 | 97.924 |      | M    |      |
| 2     | 17.846    | 495383   | 9784   | 2.076  |      | V M  |      |
| Total |           | 23864188 | 603366 |        |      |      |      |

2p: AD-H, Hexane/iPrOH=80/20, rate=1.0 mL/min, 254 nm

<Chromatogram>

mV

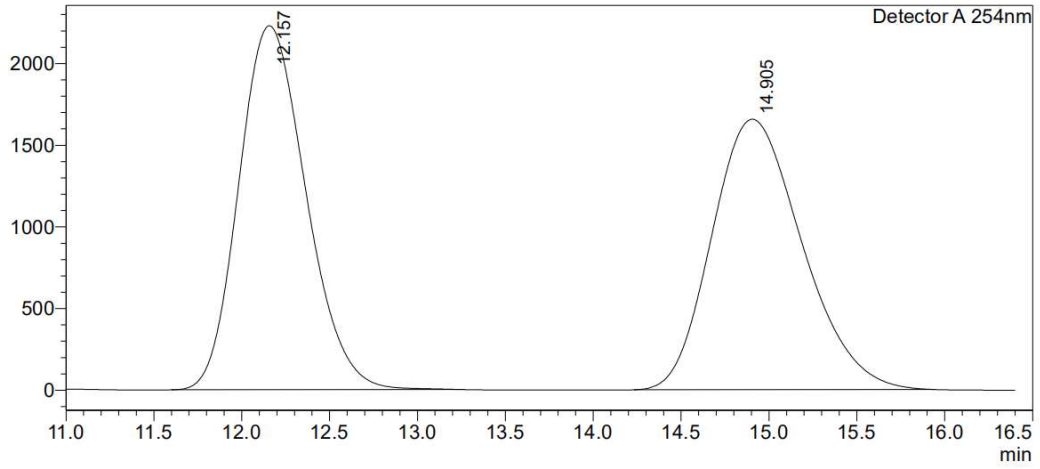

<Peak Table>

Detector A 254nm

| Peak# | Ret. Time | Area      | Height  | Conc.  | Unit | Mark | Name |
|-------|-----------|-----------|---------|--------|------|------|------|
| 1     | 12.157    | 59255289  | 2228282 | 50.069 |      | M    |      |
| 2     | 14.905    | 59092452  | 1655795 | 49.931 |      | M    |      |
| Total |           | 118347741 | 3884077 |        |      |      |      |

<Chromatogram>

mV

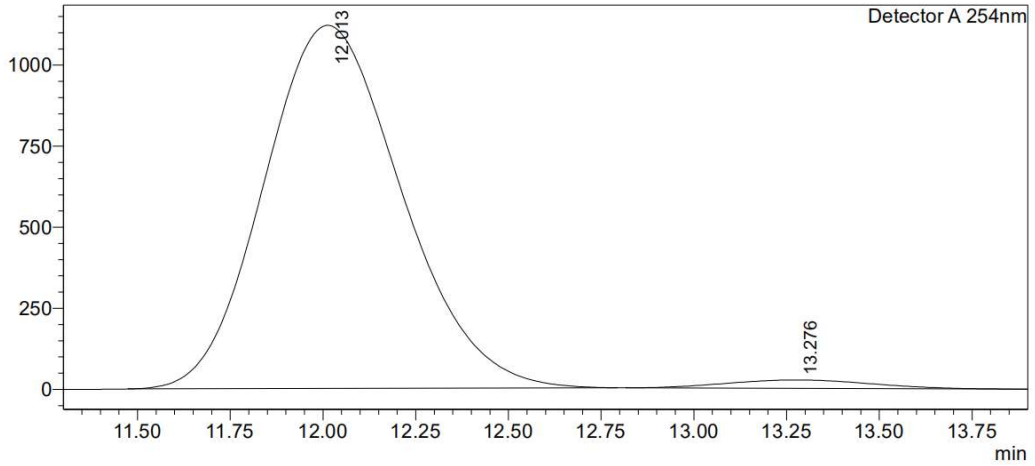

<Peak Table>

Detector A 254nm

| Peak# | Ret. Time | Area     | Height  | Conc.  | Unit | Mark | Name |
|-------|-----------|----------|---------|--------|------|------|------|
| 1     | 12.013    | 28882909 | 1119835 | 97.611 |      | M    |      |
| 2     | 13.276    | 706782   | 26075   | 2.389  |      | M    |      |
| Total |           | 29589691 | 1145911 |        |      |      |      |



2q: IB N-5, Hexane/iPrOH=85/15, rate=1.0 mL/min, 254 nm

<Chromatogram>

mV

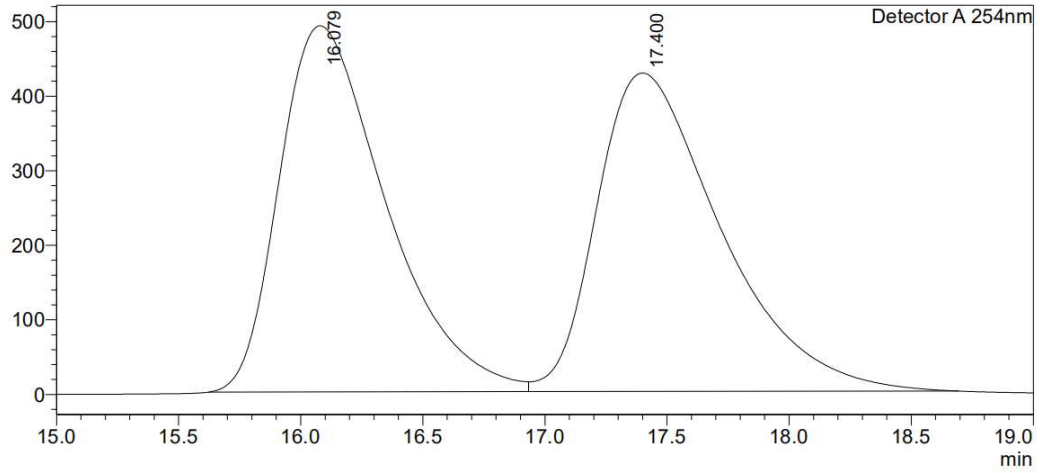

<Peak Table>

Detector A 254nm

| Peak# | Ret. Time | Area     | Height | Conc.  | Unit | Mark | Name |
|-------|-----------|----------|--------|--------|------|------|------|
| 1     | 16.079    | 14920358 | 490807 | 49.740 |      | M    |      |
| 2     | 17.400    | 15076327 | 427094 | 50.260 |      | V M  |      |
| Total |           | 29996685 | 917901 |        |      |      |      |

<Chromatogram>

mV

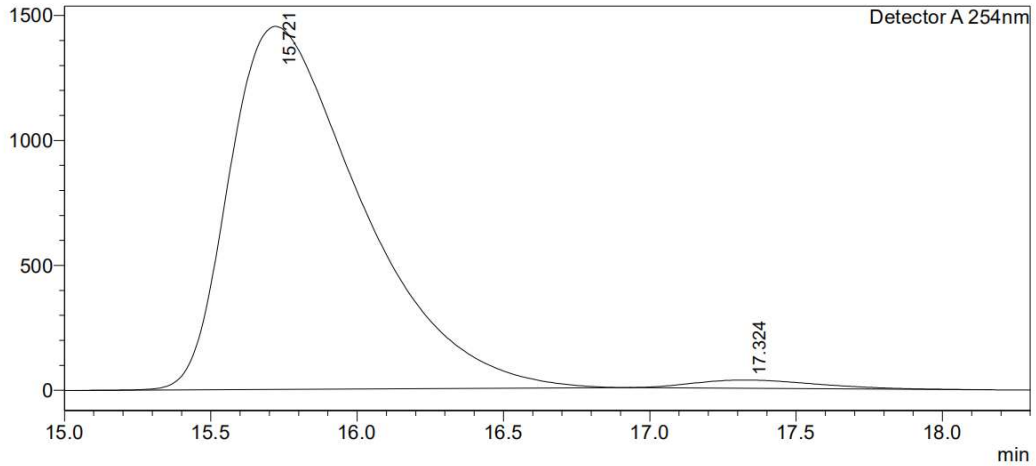

<Peak Table>

Detector A 254nm

| Peak# | Ret. Time | Area     | Height  | Conc.  | Unit | Mark | Name |
|-------|-----------|----------|---------|--------|------|------|------|
| 1     | 15.721    | 45581903 | 1452074 | 97.911 |      | M    |      |
| 2     | 17.324    | 972581   | 32992   | 2.089  |      | M    |      |
| Total |           | 46554484 | 1485067 |        |      |      |      |

2r: IA, Hexane/iPrOH=80/20, rate=1.0 mL/min, 254 nm

<Chromatogram>

mV

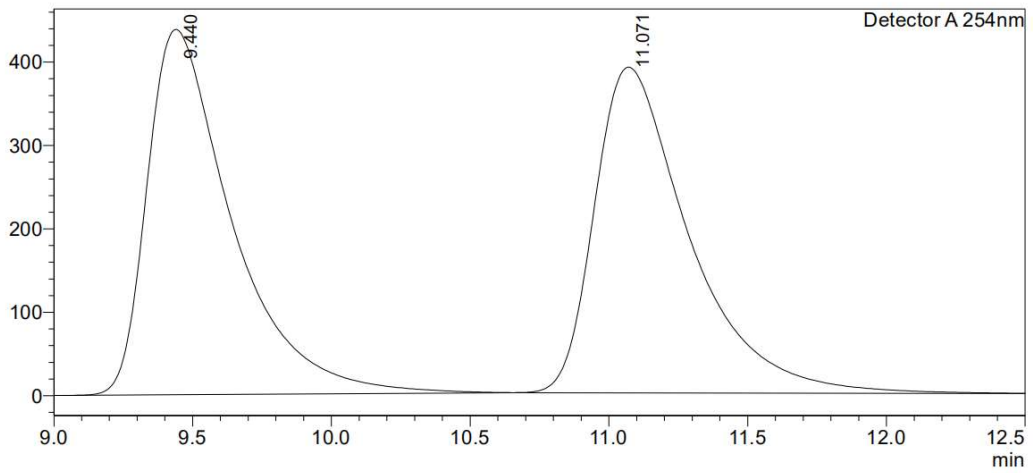

<Peak Table>

Detector A 254nm

| Peak# | Ret. Time | Area     | Height | Conc.  | Unit | Mark | Name |
|-------|-----------|----------|--------|--------|------|------|------|
| 1     | 9.440     | 9298910  | 437872 | 50.014 |      | M    |      |
| 2     | 11.071    | 9293765  | 390341 | 49.986 |      | M    |      |
| Total |           | 18592675 | 828213 |        |      |      |      |

<Chromatogram>

mV

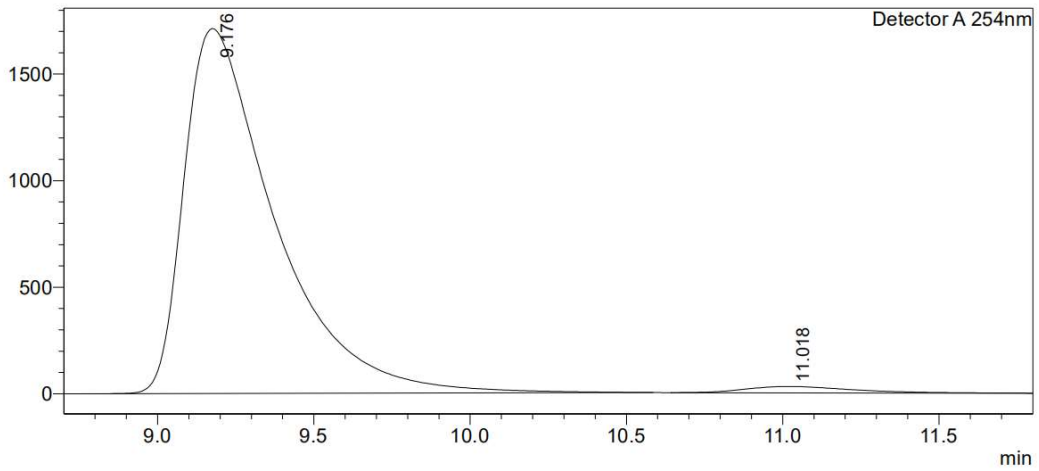

<Peak Table>

Detector A 254nm

| Peak# | Ret. Time | Area     | Height  | Conc.  | Unit | Mark | Name |
|-------|-----------|----------|---------|--------|------|------|------|
| 1     | 9.176     | 34625210 | 1712007 | 97.991 |      | M    |      |
| 2     | 11.018    | 710006   | 29822   | 2.009  |      |      |      |
| Total |           | 35335217 | 1741829 |        |      |      |      |

2s: AD-H, Hexane/iPrOH=80/20, rate=1.0 mL/min, 254 nm

<Chromatogram>

mV

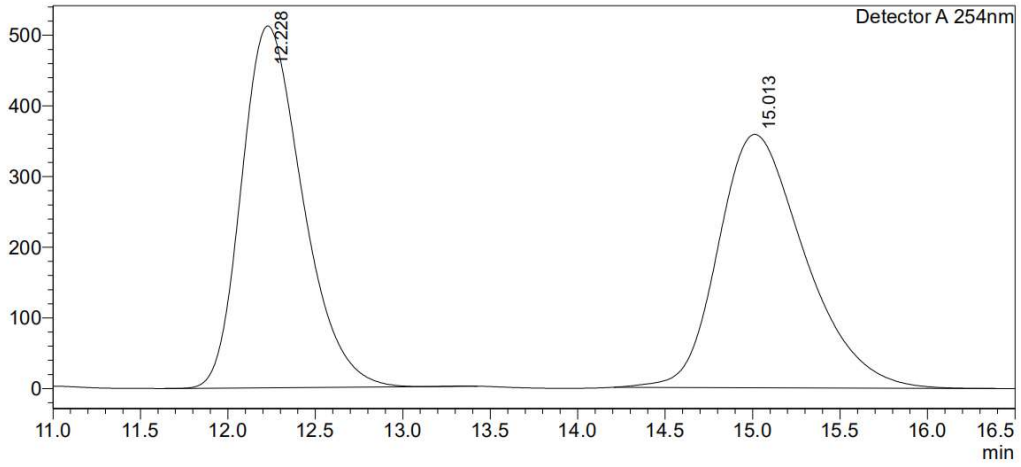

<Peak Table>

Detector A 254nm

| Peak# | Ret. Time | Area     | Height | Conc.  | Unit | Mark | Name |
|-------|-----------|----------|--------|--------|------|------|------|
| 1     | 12.228    | 12444802 | 511988 | 50.155 |      | M    |      |
| 2     | 15.013    | 12367975 | 358409 | 49.845 |      | M    |      |
| Total |           | 24812777 | 870397 |        |      |      |      |

<Chromatogram>

mV

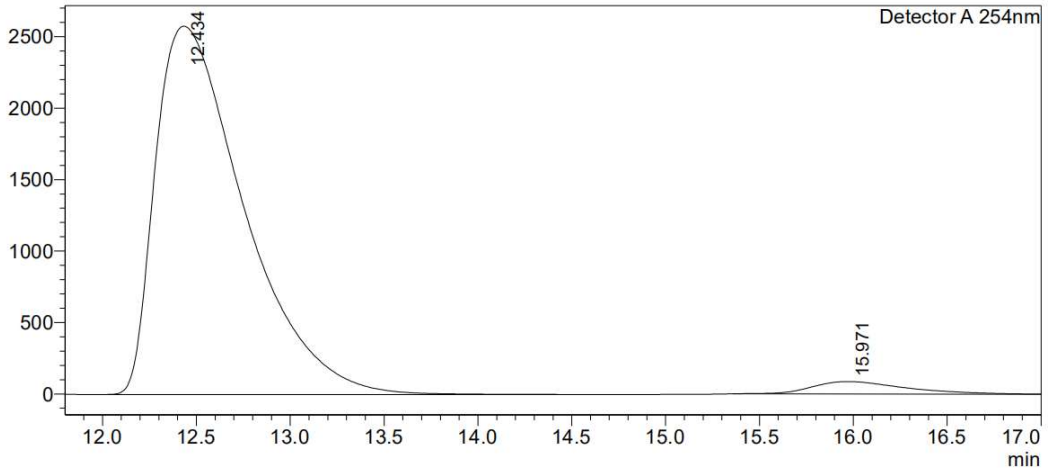

<Peak Table>

Detector A 254nm

| Peak# | Ret. Time | Area     | Height  | Conc.  | Unit | Mark | Name |
|-------|-----------|----------|---------|--------|------|------|------|
| 1     | 12.434    | 84690403 | 2577721 | 96.515 |      | M    |      |
| 2     | 15.971    | 3057631  | 87361   | 3.485  |      | M    |      |
| Total |           | 87748034 | 2665082 |        |      |      |      |

3a: AD-H, Hexane/iPrOH= 90/10, rate=1.0 mL/min, 254 nm

<Chromatogram>

mV

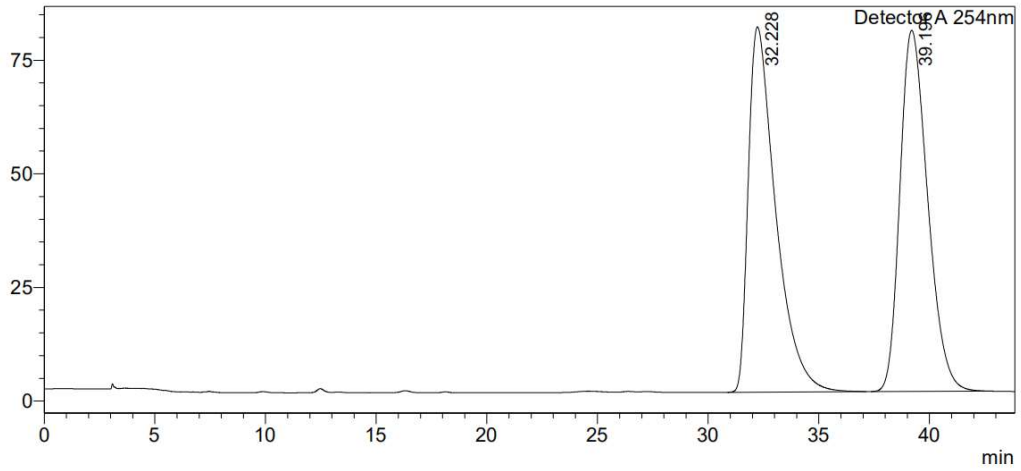

<Peak Table>

Detector A 254nm

| Peak# | Ret. Time | Area     | Height | Conc.  | Unit | Mark | Name |
|-------|-----------|----------|--------|--------|------|------|------|
| 1     | 32.228    | 6910736  | 80371  | 49.969 |      |      |      |
| 2     | 39.196    | 6919262  | 79474  | 50.031 |      |      |      |
| Total |           | 13829998 | 159844 |        |      |      |      |

<Chromatogram>

uV

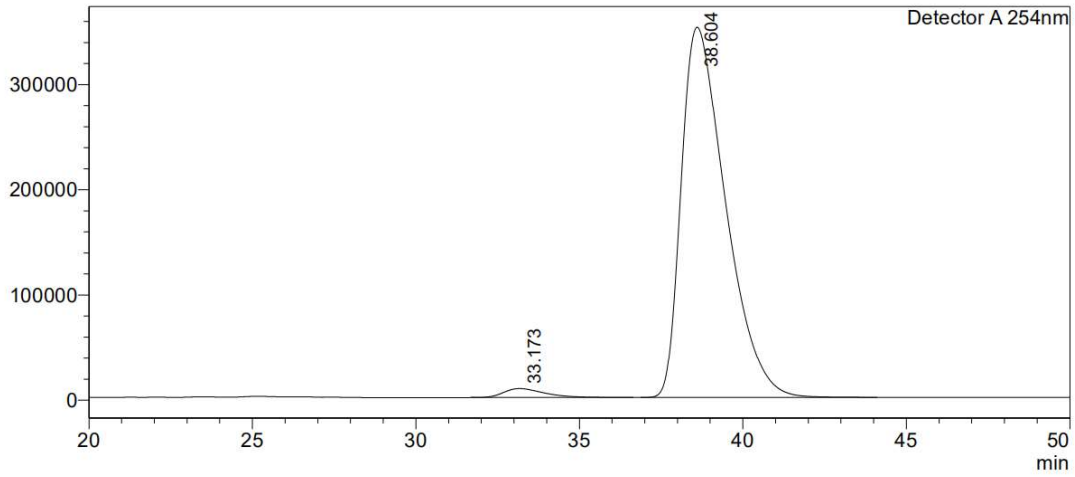

<Peak Table>

Detector A 254nm

| Peak# | Ret. Time | Area     | Height | Conc.  | Unit | Mark | Name |
|-------|-----------|----------|--------|--------|------|------|------|
| 1     | 33.173    | 740244   | 8516   | 2.180  |      |      |      |
| 2     | 38.604    | 33215619 | 351926 | 97.820 |      |      |      |
| Total |           | 33955863 | 360443 |        |      |      |      |

3b: AD-H, Hexane/iPrOH= 80/20, rate=1.0 mL/min, 254 nm

<Chromatogram>

mV

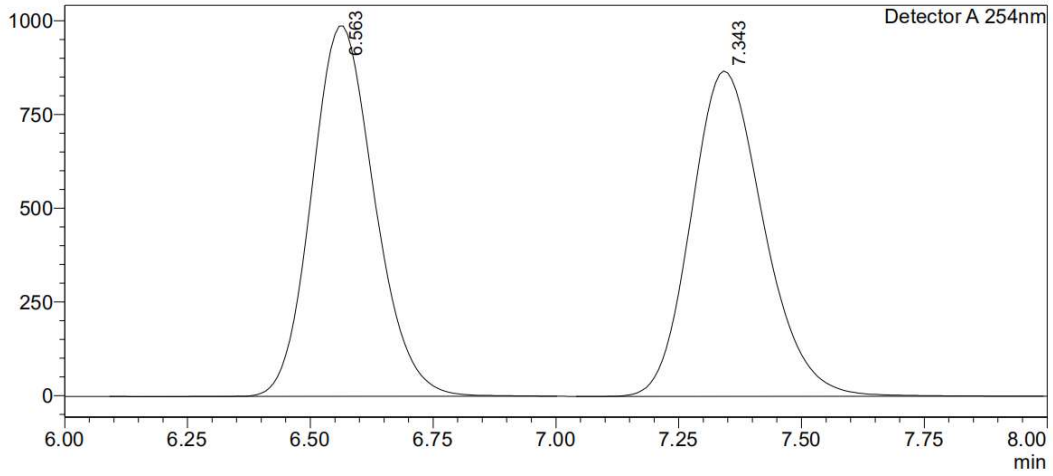

<Peak Table>

Detector A 254nm

| Peak# | Ret. Time | Area     | Height  | Conc.  | Unit | Mark | Name |
|-------|-----------|----------|---------|--------|------|------|------|
| 1     | 6.563     | 8815433  | 987522  | 49.701 |      | M    |      |
| 2     | 7.343     | 8921443  | 867800  | 50.299 |      | M    |      |
| Total |           | 17736876 | 1855321 |        |      |      |      |

<Chromatogram>

mV

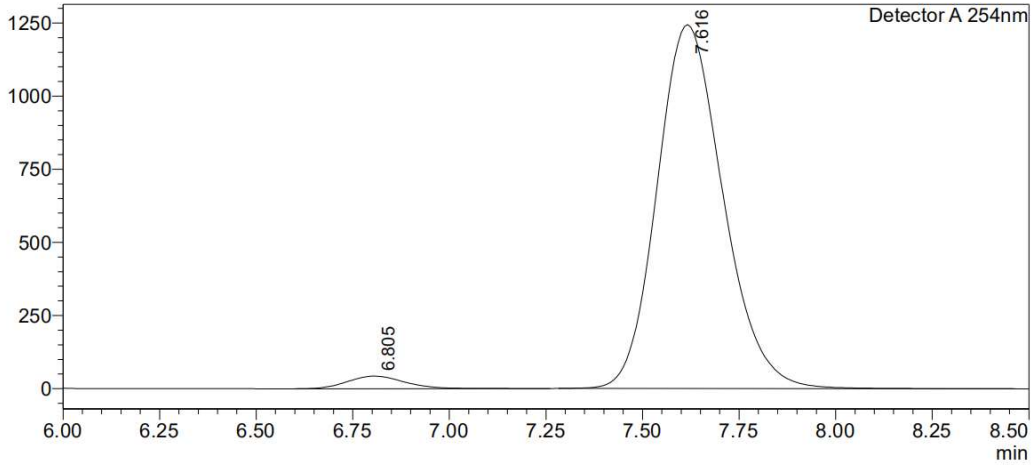

<Peak Table>

Detector A 254nm

| Peak# | Ret. Time | Area     | Height  | Conc.  | Unit | Mark | Name |
|-------|-----------|----------|---------|--------|------|------|------|
| 1     | 6.805     | 443479   | 42763   | 2.911  |      | M    |      |
| 2     | 7.616     | 14792376 | 1243875 | 97.089 |      | M    |      |
| Total |           | 15235855 | 1286638 |        |      |      |      |

3c: AS-H, Hexane/iPrOH= 70/30, rate=1.0 mL/min, 254 nm

<Chromatogram>

mV

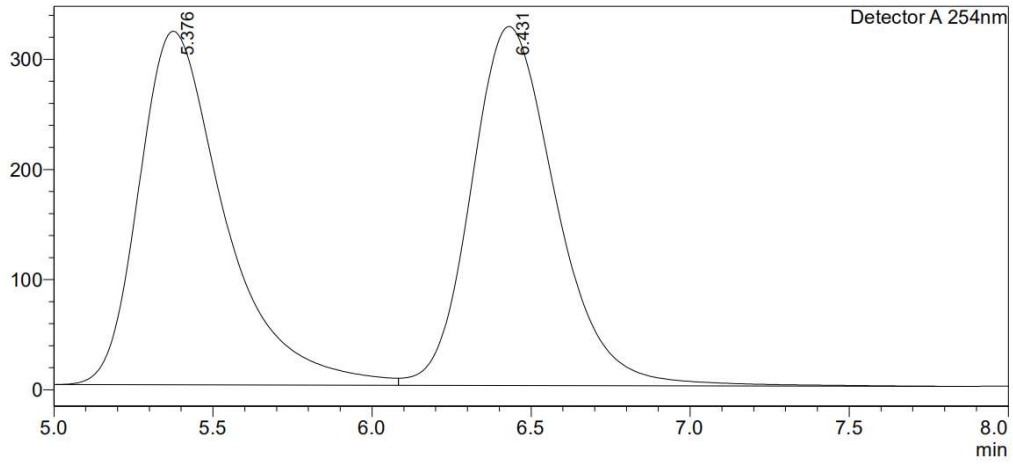

<Peak Table>

Detector A 254nm

| Peak# | Ret. Time | Area     | Height | Conc.  | Unit | Mark | Name |
|-------|-----------|----------|--------|--------|------|------|------|
| 1     | 5.376     | 6041098  | 321052 | 49.924 |      | M    |      |
| 2     | 6.431     | 6059587  | 325899 | 50.076 |      | V M  |      |
| Total |           | 12100685 | 646951 |        |      |      |      |

<Chromatogram>

mV

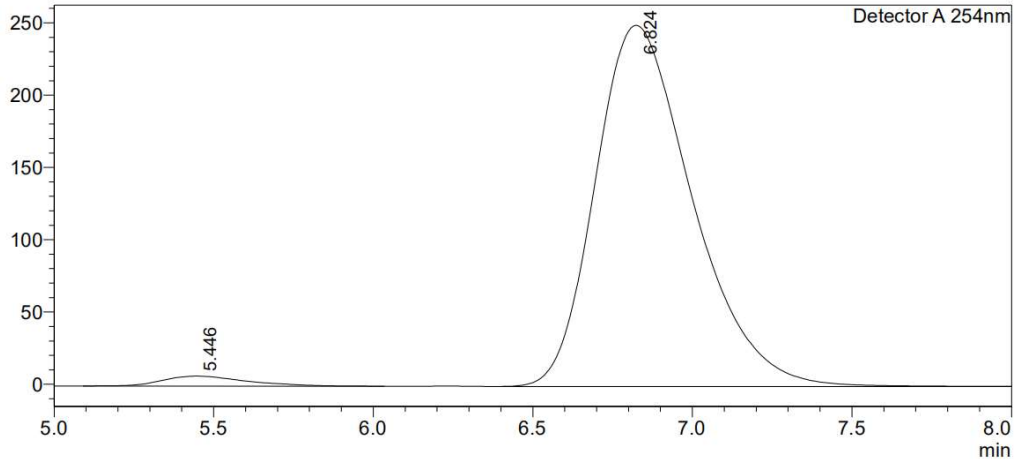

<Peak Table>

Detector A 254nm

| Peak# | Ret. Time | Area    | Height | Conc.  | Unit | Mark | Name |
|-------|-----------|---------|--------|--------|------|------|------|
| 1     | 5.446     | 126537  | 6900   | 2.337  |      | M    |      |
| 2     | 6.824     | 5287223 | 249834 | 97.663 |      | M    |      |
| Total |           | 5413760 | 256735 |        |      |      |      |
